# Supplementary material for: The Dynamics of NO3− and NH4+ Uptake in Duckweed Are Coordinated with the Expression of Major Nitrogen Assimilation Genes
Source: MDPI journal article supplement (doi:10.3390/plants11010011), 2021-12-21
Supplement: s1 [file s1]

**Table S1.** List of RT-qPCR primers used for evaluating expression of the Nitrogen assimilation genes in *S. polyrhiza* ecotype NB5548.

| Gene              | Primer name | Forward              | Primer name | Reverse                    | PCR product, length in bp |
|-------------------|-------------|----------------------|-------------|----------------------------|---------------------------|
| <i>NR</i>         | nr-f2       | CTTCTGGTCCGTCGATCTC  | nr-r3       | CCAGCAGTTGTTTCATCATTC      | 136                       |
| <i>NiR</i>        | nir-f4      | GAGGGAGGATGACGATGAAG | nir-r4      | GTGAAGCAGAAGCGACGAG        | 108                       |
| <i>GS2</i>        | GS2-f1      | CATCGCGGAGTACATTTGG  | GS2-r1      | CACCTCACTGTCTTCTCCTG       | 154                       |
| <i>GS1;1</i>      | GS1-6-5     | GAGCAAAATGGGAAAGGG   | GS1-6-4     | GCTGCTGGTGATGATATTGTG      | 134                       |
| <i>GS1;2</i>      | GS1-F5      | TTCTCGTCATGTGCGACTCC | GS1-R7      | CTCCTGCTCCAGTCCATACC       | 131                       |
| <i>GS1;3</i>      | GS1-5 qF11  | GGCGTCCTCCTGTCGTTT   | GS1-5 qR11  | CTTCTGATCTCGTCCATGC        | 119                       |
| <i>Fd-GOGAT</i>   | g8-f4       | ATACATTGCAAGACTGAGG  | g8-r5       | TGGTGAAGGTCATAGATAAGC      | 114                       |
| <i>NADH-GOGAT</i> | ng-f3       | CTTGAAGGACGATGGCAGC  | ng-r4       | TATGAGTTCTTCCACACTAGG<br>C | 131                       |
| <i>Histon3</i>    | H3dwqF1     | CGCAAGTACCAGAAGAGCAC | H3dwqR1     | CGAAGAGACCCACGAGGTAG       | 160                       |
| <i>Actin</i>      | ActindwF1   | TGTTTTCCCAAGTATCGTC  | ActinR5     | TCCCAGTTGGTGACGATT         | 153                       |

**Table S2.** Distribution of potential regulatory DNA *cis*-elements along 1kb promoter region upstream of the translation start of eight *S. polyrhiza* genes related to N assimilation. The numbers for NRE-like elements and (GA/CT)<sub>n</sub> repeats indicate their position related to the first gene ATG. Numbers for GAATC/GATTC, TATA-like and 4G elements show frequencies of those elements.

| Promoter / <i>cis</i> -element | NRE-like                                                  | GAATC/GATTC | TATA-like | (GA/CT) <sub>n</sub>         | 4G |
|--------------------------------|-----------------------------------------------------------|-------------|-----------|------------------------------|----|
| <i>NR</i>                      | -41 to -72<br>-234 to -259                                | 1           | 1         | -710 to -796                 | 5  |
| <i>NiR</i>                     | -54 to -83<br>-84 to -108<br>-184 to -209<br>-216 to -240 | ND          | 1         | -796 to -808                 | 1  |
| <i>GS1;1</i>                   | -134 to -159                                              | 4           | 2         | ND                           | 2  |
| <i>1;2</i>                     | -189 to -217<br>-477 to -503                              | 6           | 1         | -1010 to -1068               | 4  |
| <i>GS1;3</i>                   | -634 to -659                                              | ND          | 1         | -368 to -400                 | 3  |
| <i>GS2</i>                     | -89 to -117<br>-124 to -148<br>-860 to -888               | 2           | 1         | -541 to -585<br>-700 to -728 | 2  |
| <i>Fd-GOGAT</i>                | -247 to -271<br>-351 to -376                              | 1           | 3         | -329 to -351<br>-559 to -864 | 1  |
| <i>NADH-GOGAT</i>              | -86 to -109<br>-113 to -140<br>-161 to -191               | 2           | 5         | -658 to -714                 | 6  |

**Table S3.** List of primer used for cloning selected Nitrogen assimilation genes of *S.polyrhiza* ecotype NB5548.

| Gene       | Primer name     | Forward                    | Primer name     | Reverse                     | PCR product length in bp |
|------------|-----------------|----------------------------|-----------------|-----------------------------|--------------------------|
| NR         | SpNRcl F1       | TGTTTCATCCATCTGTCGGG       | NR-R3           | CCAGCAGTTGTTTCATCATTC       | 1454                     |
| NR         | NRF2            | CTTCTGGTCCGTCGATCTC        | SpNRcl R1       | AATGGAAGGGAGGGACTGG         | 1450                     |
| NIR        | SpNIRcl F1      | ATCACCCGCCGACCTCGTA        | SpNIRcl R2      | GCCACCAGCCCTCTCATCA         | 1445                     |
| NIR        | SpNIRcl F2      | GTGACGACCAGCAAGCAGA        | SpNIRcl R1      | CACCGTGAAGCAGAAGCGAC        | 1395                     |
| GS2        | GS2-7-1         | GTTGCAGAGCGGAGGAGAAGA<br>G | GS2-7-2         | ATGAAATAACAGACTGGGCGGA<br>G | 1392                     |
| GS1;1      | GS1-6-2         | CGCCGACATCAACACCTTCC       | GS1-6-3         | AGGATAAACTGGAGATGGGG        | 718                      |
| GS1;1      | GS1-6-1         | CTGAATCTTCCTTCCCCTCTC      | GS1-6-4         | GCTGCTGGTGATGATATTGTG       | 1134                     |
| GS1;2      | GS1-2-1         | CTTCTGACTTTTGGGTGCGTCC     | GS1-2-2         | GAAGGGGGGAGGACTTACTAGA<br>G | 733                      |
| GS1;2      | GS1-2-1         | CTTCTGACTTTTGGGTGCGTCC     | GS1-2-4         | GGAATGAGAAGGAACCCAGGA<br>GG | 1360                     |
| GS1;3      | GS1-5-4         | CATGGCTCTTCTCAACGAC        | GS1-5-2         | CTTCTTCTTCTCTCTCTAGGG       | 1088                     |
| Fd-GOGAT   | g8-23f          | GGCTATCTGTCAATCTAGGG       | g8-23r          | ACTCCGCTCTTAAATCCACC        | 526                      |
| Fd-GOGAT   | gogat8-f2       | TCTCCTCCTCCTCCTCTTCC       | gogat8-r1       | ACTAGATGGTGAGAAGGAGG        | 5224                     |
| NADH-GOGAT | SpNADH-GOGAT F1 | ACATACGCCTTCCAGTTT         | SpNADH-GOGAT R1 | ATGATATTAGAGCTGGTCC         | 1428                     |
| NADH-GOGAT | SpNADH-GOGAT F2 | CCTGAAAGAAAGGCTCTATAC      | SpNADH-GOGAT R2 | CCCTAGCAAGAATCTCAAAA        | 1417                     |
| NADH-GOGAT | SpNADH-GOGAT F3 | TTGGTCTTTCTTCTGAGGT        | SpNADH-GOGAT R3 | TATTGAGCTGCTTCTGGT          | 1459                     |
| NADH-GOGAT | SpNADH-GOGAT F4 | GAACAAGTAGTCAACAGCA        | SpNADH-GOGAT R4 | GGAAGTTATTCGTCTCAAG         | 1357                     |
| NADH-GOGAT | SpNADH-GOGAT F5 | CAAGATCCCAGAATTCAAC        | SpNADH-GOGAT R5 | GTCGCCATTCTCTTTATGA         | 1399                     |



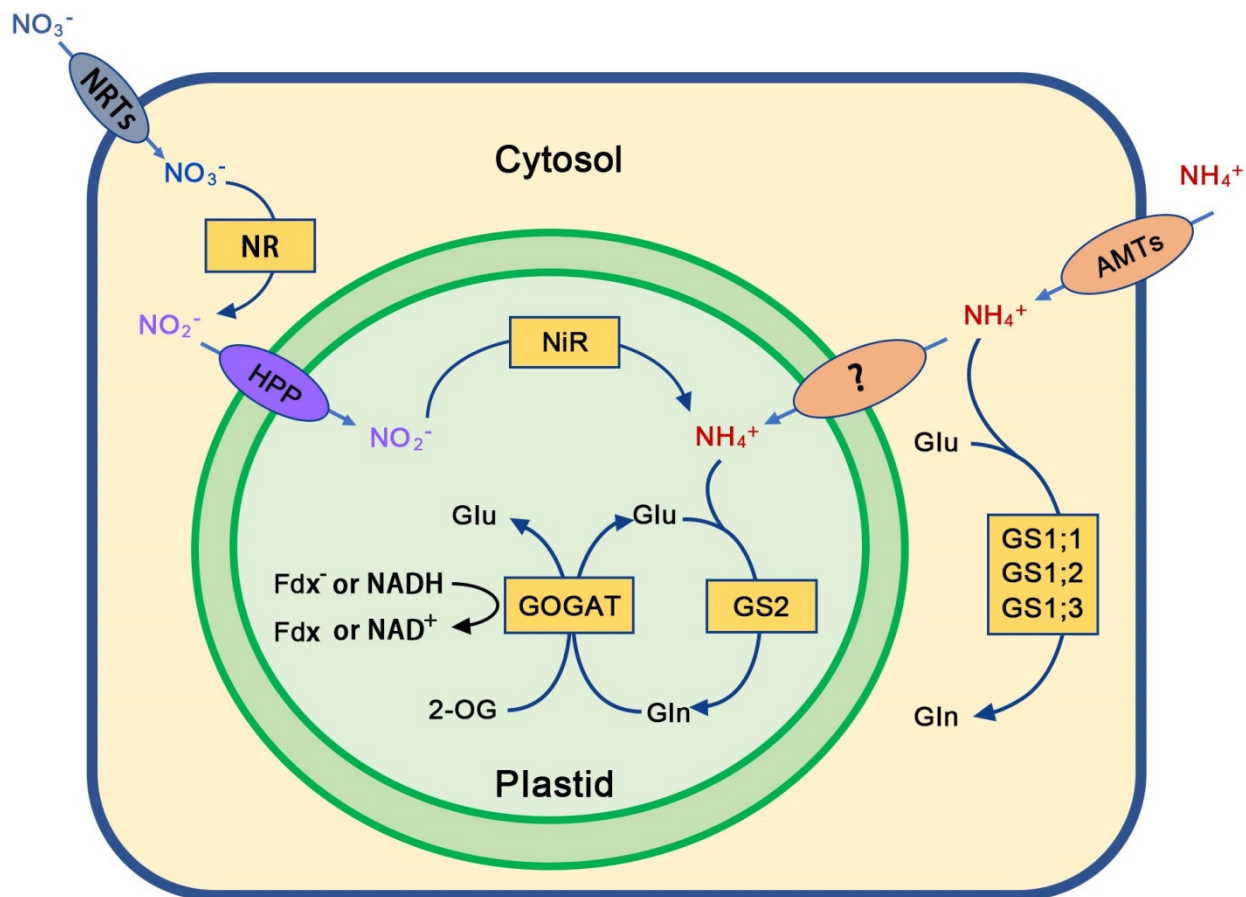

**Figure S1.** Simplified diagram of Nitrogen assimilation in plants. **NRTs**, nitrate transporters; **AMTs**, ammonium transporters; **HPP**, histidin-prolin-prolin containing protein; **NiR**, nitrite reductase; **NR**, nitrate reductase; **GS1;1**, **GS1;2**, **GS1;3**, tree isoforms of major cytosolic glutamine synthetases; **GS2**, chloroplast glutamine synthetase; **Fd-GOGAT**, ferredoxin-dependent glutamate-oxoglutarate-aminotransferase; **NADH-GOGAT**, NADH-dependent glutamate-oxoglutarate-aminotransferase; ? – unknown transporter; **2-OG**, 2-oxoglutarate; **Glu**, glutamate; **Gln**, glutamine;

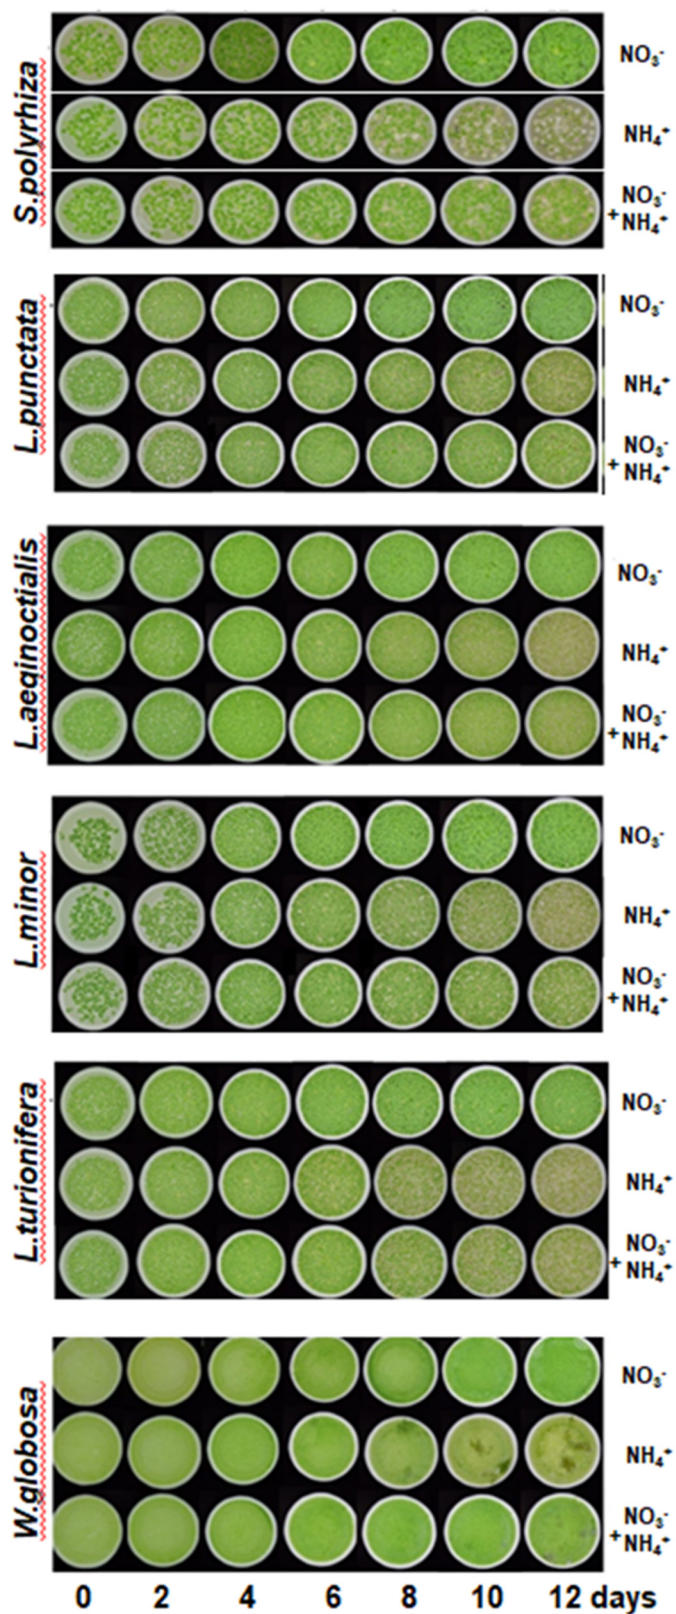

**Figure S2.** Photographic documentation of six duckweed species cultivated during 12 days on media supplied with 5 mM  $\text{NO}_3^-$ , 5 mM  $\text{NH}_4^+$  as sole N source or 2.5 mM  $\text{NO}_3^-$  and 2.5 mM  $\text{NH}_4^+$ .  
0 – start point, 2, 4, 6, 8, 10, 12 days after inoculation.

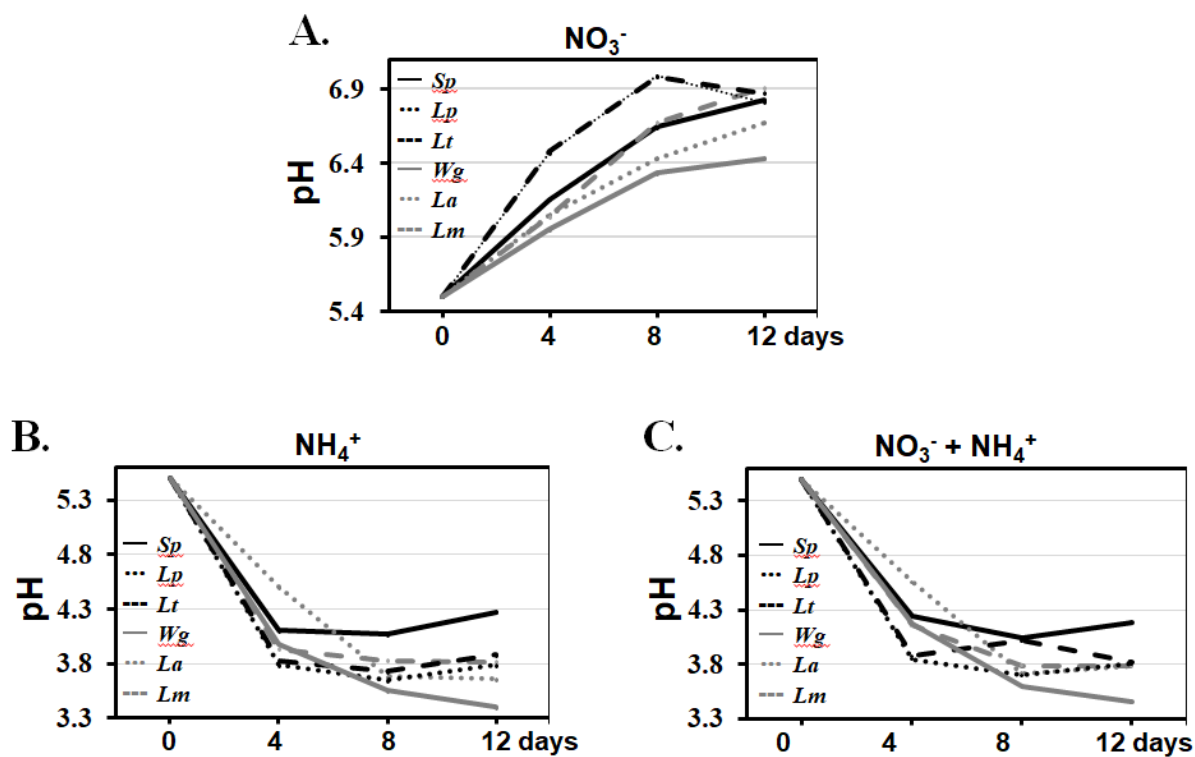

**Figure S3.** Comparative dynamics of pH changes during the course of duckweed cultivation over 12 days period in the medium supplied with different sources of Nitrogen. (A) medium supplied with 5 mM  $\text{NO}_3^-$ , (B) medium supplied with 5 mM  $\text{NH}_4^+$ ; (C) medium supplied with 2.5 mM  $\text{NO}_3^-$  and 2.5 mM  $\text{NH}_4^+$  (mix).

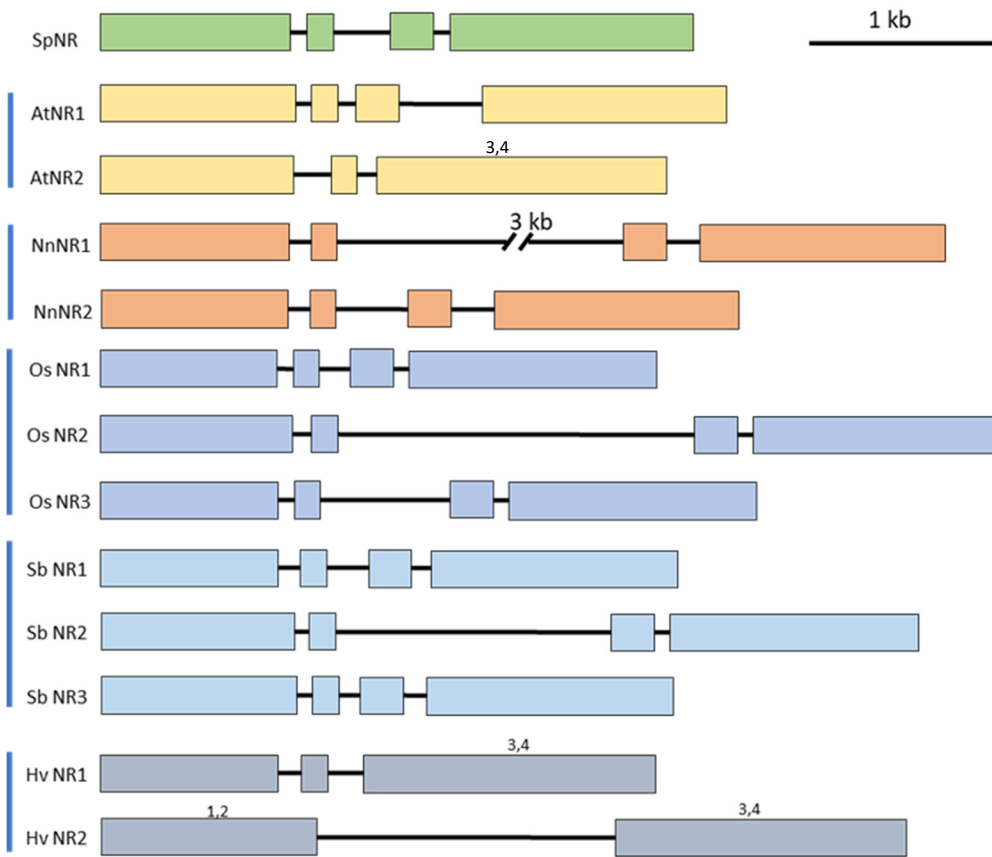

**Figure S4.** Comparison of the exon-intron structures between NR gene of *S. polyrhiza* and the homologues of some representative plant species: AtNR1 (*A. thaliana*, At1g77760); AtNR2 (*A. thaliana* At1g37130); NnNR1 (*N. nucifera*, LOC104589753); NnNR2 (*N. nucifera*, LOC104589330); OsNR1 (*O. sativa*, LOC4330867); OsNR2 (*O. sativa*, LOC4345795); OsNR3 (*O. sativa*, LOC4345798); SbNR1 (*S. bicolor*, LOC8078943); SbNR2 (*S. bicolor*, LOC8083522); SbNR3 (*S. bicolor*, LOC8055422), SpNR (*S. polyrhiza* CP019094, the 18<sup>th</sup> chromosome, position from 2346072 to 2349117). Coding sequences are colored boxes. Introns are black lines. The bar corresponds to 1kb of DNA sequence.



A

|           |             |             |             |               |            |            |            |              |
|-----------|-------------|-------------|-------------|---------------|------------|------------|------------|--------------|
| SpNR      | MVTSVDNRRF  | GHLEKGGKGV  | A-----      | -----SPFV     | SGAGDSFPNG | GAASFRRRHH | -----HHP-  | 48           |
| OsNR3     | MAASVQPRQ   | FGHLE-PGSA  | PVCGAASSNG  | AKAYPP-ANG    | IPRRADSPVR | GCGFP----- | --PLVSPPSR | --K-PPSDGS   |
| OsNR2     | MAASVQPRQ   | FGHLE-PGSA  | PVCGAASSNG  | AKAYPP-ANG    | IPRRADSPVR | GCGFP----- | --PLVSPPSR | --K-PPSDGS   |
| SbNR2     | MAA-VEPRQ   | FGRLD-PGVA  | -----TNG    | AKAYPPASH     | LPRRADSPVR | GCGFP----- | --PLVSPPSR | --SNKPPDDAS  |
| HvNR2     | MAASVEPRQ   | FGRLDAPATA  | PTARAPGSNG  | -----         | IRRRADSPVR | GCGFP----- | --SLISPP-R | --KGRVAEEE   |
| BdNR2     | MAASVEPRQ   | FGRLDAPATA  | -----GAGTNG | -----         | IRRRADSPVR | GCGFS----- | --PLISPP-R | --KSCVHEEA   |
| SbNR3     | MAASVEPRQ   | FGRLDAPATA  | -----GAGTNG | -----         | IRRRADSPVR | GCGFS----- | --PLISPP-R | --KSCVHEEA   |
| OsNR1     | MAASVEYK    | LAPHWASNA   | P-----      | -----SSN      | -----      | -----      | --DLF----  | P SGGGKRRSGS |
| SbNR1     | MAASVDRH    | LAPHWPFGNA  | P-----      | -----PKS      | -----      | -----      | --DMFRSGGP | GGGGKRRRAGS  |
| HvNR1     | MAASVEYNRQ  | VSAPHPWPTNA | Q-----      | -----         | -----      | -----      | --DLFSS--  | SGGGRRRSGA   |
| BdNR1     | MATTVDYNRQ  | ASTHPWPSNA  | Q-----      | -----         | -----      | -----      | --DLFSS--  | NSGGNHREY-   |
| AtNR2     | MAASVDNRQY  | ARLEP-----  | -----GLNG   | VVRSYKPP-V    | PG-RSDSPKA | HQNQTNN--  | -QTVFLKPAK | VH-----DDDE  |
| AtNR1     | MATSVDRNH   | -----P----- | -----TMNG   | VAHAFKPLV     | PSPRSFDHR  | HQNQTLVDIL | TETKIVKETE | VITTVDSYD    |
| NnNR1     | MEGSVENRHY  | ICREP-----  | -----CLSG   | PVHGFKTAF-    | NNLSDSPVR  | SCNFSS--   | A-PELSRPNQ | LAVM-----E   |
| NnNR2     | MAASVENRQF  | SRLEP-----  | -----GLSG   | VVHGFKAAS-    | NNRSDSPAR  | VCFNFS--   | ATPELSRPMK | PAPM-----D   |
| Consensus | MAASVEPRQ   | FGRLP-PGNA  | -----NG     | -----RR-DSPVR | GCGFP----- | --PLFSPP-R | --KG--XDG  |              |
| SpNR      | -EDSDEDEDSD | YEEYIAALKA  | SS-----GAG  | EIEPSAL-DA    | RDEATADAWV | ERNSSLIRLT | GKHPFNSEPP | LRRLMHGGFI   |
| OsNR3     | -DDEEEEEEQ- | -EDWR--ELY  | GSHL---QLE  | V-EPSV-RDA    | RDEGTADAWI | ERNPLLIRLT | GKHPFNSEPP | LRRLMHGGFI   |
| OsNR2     | -DDEEEEEEQ- | -EDWR--ELY  | GSHL---QLE  | V-EPPV-RDA    | RDEGTADAWI | ERNPLLIRLT | GKHPFNSEPP | LRRLMHGGFI   |
| SbNR2     | PSDDDDDDDD  | -EDWR--ELY  | GSHL---QLE  | V-EPAV-HDA    | RDEGTADAWI | ERNPSLVRLT | GKHPFNSEPP | LRRLMHGGFI   |
| HvNR2     | EDDDDDDEEG  | HEDW--EAY   | GSHL---QLE  | V-EPT-RDP     | RDEGTADAWI | ERNPSLVRLT | GKHPFNSEPP | LRRLMHGGFI   |
| BdNR2     | SSDEEEEEEQ- | -QDWR--ELY  | GSHL---QLE  | V-EPSV-RDP    | RDEGTADAWI | DRNPSLVRLT | GKHPFNSEPP | LRRLMHGGFI   |
| SbNR3     | SSDDDDDEHQ  | DDDDHRRHET  | GSHYLRRLG   | V-EPSVQHD     | RDEGTADAWV | ERSASLIRLT | GKHPFNSEPP | LRRLMEHGFV   |
| OsNR1     | ETSDSDEDSI  | PPDWR--SLY  | -----HPRLE  | VAEAPV-KDP    | RDEATSDAWV | RRHPALVRLT | GKHPFNSEPP | LRRLMHGGFI   |
| SbNR1     | DSDEDEDSDI  | PPDWR--SLY  | -----LPRLE  | V-EPPV-HDP    | RDEATSDAWV | RRHPALVRLT | GKHPFNSEPP | LRRLMHGGFI   |
| HvNR1     | DSDEDEDSDV  | PPDWR--SLY  | -----SPRLD  | V-EPSV-KDP    | RDEATSDAWV | RRHPALVRLT | GKHPFNSEPP | LRRLMHGGFI   |
| BdNR1     | -DSDDDEDNI  | PPDWR--SLY  | -----RPRLE  | V-DPPV-RDP    | RDEATSDAWV | RRHPALVRLT | GKHPFNSEPP | LRRLMHGGFI   |
| AtNR2     | DVSSEDEEN   | -ETHNSNAVY  | YKEMIRKSNA  | ELEPSVL-DP    | RDEYTDADI  | ERNPSMVRLT | GKHPFNSEPP | LRRLMHGGFI   |
| AtNR1     | DSSEDEDED   | -ESHNRNVPY  | YKELVKKSNS  | DLEPSIL-DP    | RDEYTDADI  | ERNPSMVRLT | GKHPFNSEPP | LRRLMHGGFI   |
| NnNR1     | ESSSEDEG--  | -DF-----D   | WKDHLQATNR  | ELEPSIL-DP    | RDEYTDADI  | ERNPSMVRLT | GKHPFNSEPP | LRRLMHGGFI   |
| NnNR2     | ESSSEDEG--  | -DS-----Y   | LKEQLQKANS  | ELEPSIL-DP    | RDEYTDADI  | ERNPSMVRLT | GKHPFNSEPP | LRRLMHGGFI   |
| Consensus | XSDSDEDED-- | -EDWR--XLY  | GSHL---XLE  | V-EPSV-RDP    | RDEGTADAWI | ERNPSLVRLT | GKHPFNSEPP | LRRLMHGGFI   |
| SpNR      | TPVPLHYVRN  | HGAVPRGKWE  | DWSVEVGLV   | RRPRLTMD      | IAGEFSAREL | PVTLACGGR  | RKEQNMVQKS | IGFNWGAAGV   |
| OsNR3     | TPAALHFVRN  | HGAVPRGDWS  | TWTVEVTGLV  | KRPMLTMD      | LVNGFPAAVE | PVTLACGGR  | RKEQNMVQQT | VGFNWGAAGV   |
| OsNR2     | TPAALHFVRN  | HGAVPRGDWS  | TWTVDVTGLV  | KRPMLTMD      | LVNGFPAAVE | PVTLACGGR  | RKEQNMVQQT | VGFNWGAAGV   |
| SbNR2     | TPAPLHYVRN  | HGAVPRGDWA  | TWAVEVTGLV  | KRPRLTMD      | LARGFAEL   | PVTLACGGR  | RKEQNMVQQT | VGFNWGAAGV   |
| HvNR2     | TPAPLHYVRN  | HGAVPRGDWA  | TWTVEVTGLV  | KRPRLTMD      | LARGFAEL   | PVTLACGGR  | RKEQNMVQQT | VGFNWGAAGV   |
| BdNR2     | TPAPLHYVRN  | HGAVPRADWA  | TWTVEVTGLV  | KRPRLTMD      | LARGFAEL   | PVTLACGGR  | RKEQNMVQQT | VGFNWGAAGV   |
| SbNR3     | TPAPLHYVRN  | HGAVPRGDWA  | AWTVEVAGLV  | KRPRLTMD      | LARGFAEL   | PVTLACGGR  | RKEQNMVQQT | VGFNWGAAGV   |
| OsNR1     | TPAPLHYVRN  | HGAVPKADWS  | TWAVEVTGLV  | KRPRLTMD      | LARGFAEL   | PVTLACGGR  | RKEQNMVQQT | VGFNWGAAGV   |
| SbNR1     | TPAPLHYVRN  | HGAVPRADWS  | TWTVEVTGLV  | KRPRLTMD      | LARGFAEL   | PVTLACGGR  | RKEQNMVQQT | VGFNWGAAGV   |
| HvNR1     | TPVPLHYVRN  | HGAVPKADWS  | TWTVEVTGLV  | KRPVKTMD      | LARGFAEL   | PVTLACGGR  | RKEQNMVQQT | VGFNWGAAGV   |
| BdNR1     | TPAPLHYVRN  | HGAVPKADWA  | TWTVEVTGLV  | KRPVKTMD      | LARGFAEL   | PVTLACGGR  | RKEQNMVQQT | VGFNWGAAGV   |
| AtNR2     | TPVPLHYVRN  | HGAVPKADWA  | TWTVEVTGLV  | KRPVKTMD      | LARGFAEL   | PVTLACGGR  | RKEQNMVQQT | VGFNWGAAGV   |
| AtNR1     | TPVPLHYVRN  | HGAVPKADWS  | TWTVEVTGLV  | KRPVKTMD      | LARGFAEL   | PVTLACGGR  | RKEQNMVQQT | VGFNWGAAGV   |
| NnNR1     | TPVPLHYVRN  | HGAVPKADWS  | TWTVEVTGLV  | KRPVKTMD      | LARGFAEL   | PVTLACGGR  | RKEQNMVQQT | VGFNWGAAGV   |
| NnNR2     | TPVPLHYVRN  | HGAVPKADWS  | TWTVEVTGLV  | KRPVKTMD      | LARGFAEL   | PVTLACGGR  | RKEQNMVQQT | VGFNWGAAGV   |
| Consensus | TPAPLHYVRN  | HGAVPRADWA  | TWTVEVTGLV  | KRPRLTMD      | LARGFAEL   | PVTLACGGR  | RKEQNMVQQT | VGFNWGAAGV   |
| SpNR      | STGVWRGRL   | CDILRRCGIM  | RRPPTGEAAG  | GGAPPKMNV     | FEGEDLPGG  | GG-----SKY | GTSITREXAM | DPSRDIILAY   |
| OsNR3     | STSVWRGRL   | RDVLRRCGIM  | PSKG--GA--  | -----LNVC     | FEGEDLPGG  | GG-----SKY | GTSITREXAM | DPSRDIILAY   |
| OsNR2     | STSVWRGRL   | RDVLRRCGIM  | PSKG--GA--  | -----LNVC     | FEGEDLPGG  | GG-----SKY | GTSITREXAM | DPSRDIILAY   |
| SbNR2     | STSVWRGRL   | RDVLRRCGIM  | PRKGGGGA--  | -----LNVC     | FEGEDLPGG  | GGGGGGSTKY | GTSITREXAM | DPSRDIILAY   |
| HvNR2     | STSVWRGRL   | RDVLRRCGIM  | -SKKGQ-A--  | -----LNVC     | FEGEDLPGG  | GG-----SKY | GTSITREXAM | DPSRDIILAY   |
| BdNR2     | STSVWRGRL   | RDVLRRCGIM  | GARQGGGA--  | -----LNVC     | FEGEDLPGG  | GG-----SKY | GTSITREXAM | DPSRDIILAY   |
| SbNR3     | STSVWRGRL   | RDVLRRCGIM  | VDDGGGGA--  | -----LNVC     | FEGEDLPGG  | GG-----SKY | GTSITREXAM | DPSRDIILAY   |
| OsNR1     | STSVWRGVRL  | RDVLRRCGIM  | GASA--GA--  | -----ANVC     | FEGEDLPGG  | GG-----SKY | GTSITREXAM | DPSRDIILAY   |
| SbNR1     | STSVWRGRL   | RDVLRRCGIM  | GAAD--GA--  | -----ANVC     | FEGEDLPGG  | GG-----SKY | GTSITREXAM | DPSRDIILAY   |
| HvNR1     | STTVWRGVRL  | RDVLRRCGIM  | GAGA--A--   | -----SNVC     | FEGEDLPGG  | GG-----SKY | GTSITREXAM | DPSRDIILAY   |
| BdNR1     | STSVWRGVRL  | RDVLRRCGIM  | GRSGDSGA--  | -----SNVC     | FEGEDLPGG  | GG-----SKY | GTSITREXAM | DPSRDIILAY   |
| AtNR2     | STSVWRGVPL  | CDVLRRCGIM  | SRKG--GA--  | -----LNVC     | FEGEDLPGG  | AGTAG--SKY | GTSITREXAM | DPSRDIILAY   |
| AtNR1     | STSLWKGIFL  | SEILRRCGIF  | SRRG--GA--  | -----LNVC     | FEGEDLPGG  | GG-----SKY | GTSITREXAM | DPSRDIILAY   |
| NnNR1     | STSVWRGVRL  | CDVLRRCGIM  | SRRK--GA--  | -----LNVC     | FEGEDLPGG  | GG-----SKY | GTSITREXAM | DPSRDIILAY   |
| NnNR2     | STSVWRGIRL  | CKVLRRCGIM  | SRRK--GA--  | -----LNVC     | FEGEDLPGG  | GG-----SKY | GTSITREXAM | DPSRDIILAY   |
| Consensus | STSVWRGRL   | RDVLRRCGIM  | GRKG--GA--  | -----LNVC     | FEGEDLPGG  | GG-----SKY | GTSITREXAM | DPSRDIILAY   |
| SpNR      | MHNGELLSPD  | HGFPVRMIP   | GYIGGRMVKV  | LKRIVTTAE     | SDNYHYKDN  | KVLPSPVDAE | LANAEAWWYK | PEYINELN     |
| OsNR3     | MQNGEPLLPD  | HGFPVRMIP   | GCTGGRMVKV  | VKRIIVTTAE    | SDNYHYKDN  | KVLPSPVDAE | LANAEAWWYK | PEYINELN     |
| OsNR2     | MQNGEPLLPD  | HGFPVRMIP   | GCTGGRMVKV  | VKRIIVTTAE    | SDNYHYKDN  | KVLPSPVDAE | LANAEAWWYK | PEYINELN     |
| SbNR2     | MQNGEPLLPD  | HGFPVRMIP   | GCTGGRMVKV  | LKRIVTTAE     | SDNYHYKDN  | KVLPSPVDAE | LANAEAWWYK | PEYINELN     |
| HvNR2     | MQNGEPLLPD  | HGFPVRMIP   | GCTGGRMVKV  | VKRIIVTTAE    | SDNYHYKDN  | KVLPSPVDAE | LANAEAWWYK | PEYINELN     |
| BdNR2     | MQNGEPLLPD  | HGFPVRMIP   | GCTGGRMVKV  | VKRIIVTTAE    | SDNYHYKDN  | KVLPSPVDAE | LANAEAWWYK | PEYINELN     |
| SbNR3     | QQNGGFLLPD  | HGFPVRMIP   | GCTAGRMVKV  | LKRIVTTAE     | SDNYHYKDN  | KVLPSPVDAE | LANAEAWWYK | PEYINELN     |
| OsNR1     | MQNGEPLLPD  | HGFPVRMIP   | GCTGGRMVKV  | LKRIVTTAE     | SDNYHYKDN  | KVLPSPVDAE | LANAEAWWYK | PEYINELN     |
| SbNR1     | MQNGEPLLPD  | HGFPVRMIP   | GCTGGRMVKV  | LKRIVTTAE     | SDNYHYKDN  | KVLPSPVDAE | LANAEAWWYK | PEYINELN     |
| HvNR1     | MQNGEPLLPD  | HGFPVRMIP   | GCTGGRMVKV  | LKRIVTTAE     | SDNYHYKDN  | KVLPSPVDAE | LANAEAWWYK | PEYINELN     |
| BdNR1     | MQNGEPLLPD  | HGFPVRMIP   | GCTGGRMVKV  | LKRIVTTAE     | SDNYHYKDN  | KVLPSPVDAE | LANAEAWWYK | PEYINELN     |
| AtNR2     | MQNGEPLLPD  | HGFPVRMIP   | GCTGGRMVKV  | LKRIVTTAE     | SDNYHYKDN  | KVLPSPVDAE | LANAEAWWYK | PEYINELN     |
| AtNR1     | MQNGEPLLPD  | HGFPVRMIP   | GCTGGRMVKV  | LKRIVTTAE     | SDNYHYKDN  | KVLPSPVDAE | LANAEAWWYK | PEYINELN     |
| NnNR1     | MQNGEPLLPD  | HGFPVRMIP   | GCTGGRMVKV  | LKRIVTTAE     | SDNYHYKDN  | KVLPSPVDAE | LANAEAWWYK | PEYINELN     |
| NnNR2     | MQNGEPLLPD  | HGFPVRMIP   | GCTGGRMVKV  | LKRIVTTAE     | SDNYHYKDN  | KVLPSPVDAE | LANAEAWWYK | PEYINELN     |
| Consensus | MQNGEPLLPD  | HGFPVRMIP   | GCTGGRMVKV  | LKRIVTTAE     | SDNYHYKDN  | KVLPSPVDAE | LANAEAWWYK | PEYINELN     |



|           |             |             |             |             |             |            |             |            |     |
|-----------|-------------|-------------|-------------|-------------|-------------|------------|-------------|------------|-----|
| SpNR      | NSVITTPAHD  | EILPINSVTS  | QRFYTMKGYA  | YAGGGKKVTR  | VEVTLDDGET  | WLQCELDLPE | RPNKYGYKWC  | WCFWSVDLEV | 436 |
| OsNR3     | NSVITAPGHD  | EILPINGITT  | QRGYTMKGYA  | YSGGGKRI TR | VEVTLDDGET  | WLCVLDLPE  | KPTKYGKHWC  | WCFWSVEVEV | 441 |
| OsNR2     | NSVITTPGHD  | EILPINGITT  | QRGYTMKGYA  | YSGGGKRI TR | VEVTLDDGET  | WLCVLDLPE  | KPTKYGKHWC  | WCFWSVEVEV | 441 |
| SbNR2     | NSVITTPGHD  | EILPINAITT  | QRGYTMKGYA  | YSGGGKKVTR  | VEVTLDDGET  | WLVCVLDHPE | KPNKYGYKWC  | WCFWSVEVEV | 444 |
| HwNR2     | NSVITTPGHD  | EILPINAFTT  | QRAYTIKGYA  | YSGGGKRI TR | VEVTLDDGES  | WMLCTLDIPE | KPNKYGRYWC  | WCFWSVEIEV | 438 |
| BdNR2     | NSVITTPGHD  | EILPINAFTT  | QRAYTMKGYA  | YSGGGKKI TR | VEVTLDDGET  | WQVCTLDIPE | KPNKYGRYWC  | WCFWSVEVEV | 433 |
| SbNR1     | NSVITTPGHN  | DFLPINAITT  | QRTYTMKGFA  | YSGGGKKVTR  | VEVTLDDGGT  | WLVCVLDHPE | KPTKYGRWC   | WCFWSIDVEL | 449 |
| OsNR1     | NSVITTPGHD  | EVLPIALITT  | QRPYTMKGYA  | YSGGGKRVTR  | VEVTLDDGET  | WQVCNLDHPE | RPTKYGYKWC  | WCFWSVDVEV | 414 |
| SbNR1     | NSVITTPGHD  | EVLPIALITT  | QRPYTIKGYA  | YSGGGKRVTR  | VEVTLDDGET  | WQVCNLDHPE | RPTKYGYKWC  | WCFWSVDVEV | 417 |
| HwNR1     | NSVITTPGHD  | EVLPIALITT  | QKPYTMKGYA  | YSGGGKRVTR  | VEVTLDDGET  | WQVCLEHPE  | RPTKYGYKWC  | WCFWSVEVEV | 416 |
| BdNR1     | NSVIATPGHD  | EVLPIALITT  | QKPYTMKGYA  | YSGGGKRVTR  | VEVTLDDGET  | WQVCLEHPE  | RPTKYGYKWC  | WCFWSVEVEV | 419 |
| AtNR2     | NSVITTPCHE  | EILPINAFTT  | QRPYTLKGYA  | YSGGGKKVTR  | VEVTLDDGET  | WVNCALDHQE | KPNKYGKFWC  | WCFWSLEVEV | 443 |
| AtNR1     | NSVITTPGHA  | EILPINAFTT  | QKPYTLKGYA  | YSGGGKKVTR  | VEVTLDDGDT  | WSVCELDHQE | KPNKYGKFWC  | WCFWSLDVEV | 446 |
| NnNR1     | NSVITTPCHE  | EFLPINSTAN  | QRPYTLRGYA  | YSGGGKKVTR  | VEVTLDDGES  | WLVCALDHPE | KPNKYGYKWC  | WCFWSLDVEM | 432 |
| NnNR2     | NSVITTPCHQ  | EILPINSTTT  | QRSYTLRGYA  | YSGGGKKVTR  | VEVTLDDGDS  | WLVCALDHPE | KPNRYGYKWC  | WCFWSVEVEV | 433 |
| Consensus | NSVITTPGHD  | EILPINAXTT  | QRPYTMKGYA  | YSGGGKKVTR  | VEVTLDDGET  | WLVCALDHPE | KPNKYGYKWC  | WCFWSVEVEV |     |
| SpNR      | LDLLGAKEIA  | VRAWDQALNT  | QPEKL IWNVL | GMMNNCWFRV  | KVNVCPRPHG  | EIGLVFEHPT | KPGNQTGGWM  | AREKHLEITE | 516 |
| OsNR3     | LDLLGAKEIA  | VRAWDQSHNT  | QPEKL IWNLM | GMMNNCWFKV  | KVNVCPRPHG  | EIGLVFEHPT | QPGNQTGGWM  | ARQKHLETA  | 521 |
| OsNR2     | LDLLGAKEIA  | VRAWDQSHNT  | QPEKL IWNLM | GMMNNCWFKV  | KVNVCPRPHG  | EIGLVFEHPT | QPGNQTGGWM  | ARQKHLETA  | 521 |
| SbNR2     | LDLLGAKEIA  | VRAWDQSLNT  | QPEKL IWNLM | GMMNNCWFKV  | KVNVCPRPHG  | EIGLVFEHPT | QPGNQSGGWM  | ARQKHLETA  | 524 |
| HwNR2     | LDLLGAKEVA  | VRAWDQTHNT  | QPEKL IWNLM | GMMNNCWFKI  | KVNVCPRPHG  | EIGLVFEHPT | QPGNQTGGWM  | ARQKHLETA  | 518 |
| BdNR2     | LDLLGAKEVA  | VRAWDQTHNT  | QPEKL IWNLM | GMMNNCWFKV  | KVNVCPRPHG  | EIGLVFEHPT | QPGNQTGGWM  | ARQKHLETA  | 513 |
| SbNR3     | ADLLACKEIA  | VRAWDQSLNT  | QPEFLTWLNL  | GMMTNCWFRV  | KVNVCPRPSNG | EIGLAFEHPV | QPGNQPGGWM  | AQKKHIESAE | 529 |
| OsNR1     | LELLAAKEIA  | VRAWDESLNT  | QPEKL IWNLM | GMMNNCWFRV  | KTKTCRPHKG  | EIGLVFEHPT | QPGNQAGGWM  | ARQKHLETS  | 493 |
| SbNR1     | LDVLGAKEIA  | VRAWDEAMNT  | QPEKL IWNLM | GMMNNCWFRV  | KINACRPHKG  | EIGMVFEHPA | QPGNQPGGWM  | ARQKHLETS  | 496 |
| HwNR1     | LELLGAKEMA  | VRAWDEALNT  | QPEKL IWNLM | GMMNNCWFRV  | KINVCPRPHG  | EIGLVFDHPT | QPGNQSGGWM  | ARQKHLETS  | 495 |
| BdNR1     | LELLGAKEMA  | VRAWDEAMNT  | QPEKL IWNLM | GMMNNCWFRV  | KINVCPRPHG  | EIGLVFEHPT | QPGNQPGGWM  | ARQKHMDTST | 499 |
| AtNR2     | LDLLSAKEIA  | VRAWDETLNT  | QPEKMIWNLM  | GMMNNCWFRV  | KTNVCKPHKG  | EIGLVFEHPT | LPGNESGGWM  | AKERHLEKSA | 523 |
| AtNR1     | LDLLSAKDVIA | VRAWDESFNT  | QPDKL IWNLM | GMMNNCWFRV  | RTNVCKPHKG  | EIGLVFEHPT | RPGNQSGGWM  | AKERQLEISS | 526 |
| NnNR1     | LDLLGANEIA  | VRAWDESLNT  | QPEEL IWNLM | GMMNNCWFRV  | KMNVCPRHKG  | EIGLVFEHPT | QPGNQPGGWM  | DRQKHLDS   | 511 |
| NnNR2     | MYLLGAKEIA  | VRAWDETLNT  | QPEKL IWNLM | GMMNNCWFRV  | KMNVCPRHKG  | EIGLVFEHPT | QPGNQPGGWM  | ARQKHLETS  | 512 |
| Consensus | LDLLGAKEIA  | VRAWDESLNT  | QPEKL IWNLM | GMMNNCWFRV  | KVNVCPRPHG  | EIGLVFEHPT | QPGNQXGGWM  | ARQKHLETS  |     |
| SpNR      | GQ-----S-   | LKKSISPPFM  | NTAA---KHY  | SMSEVRRHST  | RDSAWIVVHG  | HVYDCTSLFK | DHPGGADSL   | INAGTDCTED | 586 |
| OsNR3     | AAA-----PGL | K-RSTSTPFM  | NT-T-DGKQF  | TMSEVRKHSS  | QDSAWIVVHG  | HVYDCTAFLK | DHPGGADSL   | INAGTDCTEE | 594 |
| OsNR2     | AAA-----PGL | K-RSTSTPFM  | NT-T-DGKQF  | TMSEVRKHSS  | QDSAWIVVHG  | HVYDCTAFLK | DHPGGADSL   | INAGTDCTEE | 594 |
| SbNR2     | AAA-----PGL | K-RSTSTPFM  | STIS-DGKQF  | TMSEVRRHAS  | QESAWIVVHG  | HVYDCTKFLK | DHPGGADSL   | INAGTDCTEE | 598 |
| HwNR2     | AAA-----PGL | K-RSTSTPFM  | NTAG-D-KQF  | TMSEVRKHGS  | KESAWIVVHG  | HVYDCTAFLK | DHPGGADSL   | INAGSDCTEE | 591 |
| BdNR2     | AAA-----PGL | K-RSTSTPFM  | NTTG-D-KQF  | TMSEVRKHGS  | QESAWIVVHG  | HVYDCTAFLK | DHPGGADSL   | INAGTDCTEE | 586 |
| SbNR3     | AAGAASPPAL  | PPRSTSAATS  | TTNT-ASNQF  | TMSEVRRHAS  | KDSAWIVVHG  | HVYDCTEYK  | DHPGGADSL   | INAGTDCTEE | 608 |
| OsNR1     | -ESAV---ST  | LKRSTSTPFL  | NTATTQ---Y  | TMSEVRRHTT  | PESAWIVVHG  | HVYDCTGFLK | DHPGGADSIM  | INAGTDCTEE | 566 |
| SbNR1     | -ESAQ---GT  | LKKSTSTPFL  | NTATTQ---Y  | TMSEVRRHTS  | PDSAWIVVHG  | HIYDCTGFLK | DHPGGADSL   | INAGTDCTEE | 569 |
| HwNR1     | -ETQO---GT  | LKRSTSTPFL  | STASAQ---F  | TMSEVRRHAS  | KDSAWIVVHG  | HVYDCTAFLK | DHPGGADSL   | INAGSDCTEE | 568 |
| BdNR1     | SETSQ---GT  | LKRSTSTPFL  | AVAAANSRY   | AMSEVRRHAS  | RESAWIVVHG  | HVYDCTGFLK | DHPGGADSL   | INAGTDCTEE | 576 |
| AtNR2     | DA-----PPS  | LKKSSTSTPFL | NTTA---KMY  | SMSEVKKHNS  | ADSCWIVVHG  | HIYDCTRFLM | DHPGGSDSL   | INAGTDCTEE | 595 |
| AtNR1     | ES-----NNT  | LKKSSTSTPFL | NTAS---KMY  | SISEVRKHNT  | ADSCWIVVHG  | HIYDCTRFLK | DHPGGSDSL   | INAGTDCTEE | 598 |
| NnNR1     | ES-----NPI  | MKKSSTSTPFL | NISS---KTF  | SMSEVKKHNS  | AESAWIVVHG  | KVYDCTPFLK | DHPGGADSL   | INAGSDCTEE | 583 |
| NnNR2     | ES-----NQT  | MKKSSTSTPFL | NTSS---KTF  | SMPEVKNHNS  | AESAWIVVHG  | HVYDCTGFLK | DHPGGVDSL   | INAGSDCTEE | 584 |
| Consensus | AAA-----PGX | LKRSTSTPFL  | NTAX-D-KQF  | TMSEVRKHXS  | XDSAWIVVHG  | HVYDCTAFLK | DHPGGADSL   | INAGTDCTEE |     |
| SpNR      | FDAlHSEKAK  | SMLETYRVGE  | LITTTG--YLS | DA-----S    | NHGANNLAL-  | --LSSIAEA- | ---APSPRR   | VALVPRE-KI | 649 |
| OsNR3     | FDAlHSDKAK  | ALLDTRYIGE  | LITTTGAGYSS | D-----NS    | VHGASN-LSQ  | --LAPIREAI | K-APAP---V  | ALSSPRD-KV | 659 |
| OsNR2     | FDAlHSDKAK  | ALLDTRYIGE  | LITTTGAGYSS | D-----NS    | VHGASN-LSQ  | --LAPIREAI | K-APAP---V  | ALSSPRD-KV | 659 |
| SbNR2     | FDAlHSDKAK  | ALLDTRYIGE  | LITTTGTGYSS | D-----NS    | VHGSSAVLSN  | --LAPIREAV | R-APAP---V  | ALSNPRE-KI | 664 |
| HwNR2     | FDAlHSDKAK  | ALLDTRYIGE  | LITTTGTGYNS | D-----NS    | VHGSS-LSH   | --LAPIREAT | KVAGAP---I  | ALSSPRE-KV | 657 |
| BdNR2     | FDAlHSDKAK  | ALLDTRYIGE  | LITTTGTGYNS | D-----NS    | VHGSSN-LSH  | --LAPIREAT | K-ALAP---I  | ALSSPRE-KV | 651 |
| SbNR3     | FDAlHSDKAK  | DLGAYRIGD   | LLVTAAGTEQ  | A-----SH    | SH-----LEH  | ---API---- | -GGPAPPVVV  | ALSNPREKKV | 668 |
| OsNR1     | FDAlHSDKAR  | GLLEMYRIGE  | LIVTGSDYS-  | P-----QS    | SSADLTISVE  | SPTAAAPAV  | -----PVSTV  | ALSNPRE-KV | 632 |
| SbNR1     | FDAlHSDKAR  | GLLDLYRVGE  | LIVTGSDYS-  | P-----QN    | SHADLRAIDE  | APAAAAPAAQ | -----SVSTV  | ALSNPRE-KV | 635 |
| HwNR1     | FDAlHSAKAR  | GLLEMYRVGE  | LIVTGNDYS-  | P-----QS    | SHADLAAIVE  | APAVVVPRL- | -----PASAV  | ALANPRE-KV | 633 |
| BdNR1     | FDAlHSAKAR  | GLLEMYRVGE  | LIVTGADYS-  | P-----QS    | SHADLNAIAE  | PPPTVVPPQV | ISSSSSSAV   | ALANPRE-KV | 648 |
| AtNR2     | FEAlHSDKAK  | KMLLEDYRIGE | LITTTG--YSS | DSSS--PNNS  | VHGSSAVFSL  | --LAPIGEA- | ---TPVRNL   | ALVNPRE-KV | 663 |
| AtNR1     | FEAlHSDKAK  | KMLLEDYRIGE | LITTTG--YDS | ---S--PNVS  | VHGASNFGSL  | --LAPIKEL- | ---TPQRNI   | ALVNPRE-KI | 663 |
| NnNR1     | FDAlHSDKAR  | KMLLEDYRIGE | LITTTG--YTS | DSSSS--PNNS | VHGASN-LSQ  | --LAPIKEV- | ---STVTINV  | ALI-PRE-KI | 651 |
| NnNR2     | FDAlHSDKAK  | KMLLEDYRLGQ | LIVTAAGTEQ  | DSSSS--PNNS | VHGASDL-TH  | --LDPIKEV- | ---TVTRNV   | ALI-PRE-KI | 652 |
| Consensus | FDAlHSDKAK  | ALLETRYIGE  | LITTTG-GYSS | D-----NS    | VHGASN-LSX  | --LAPIREA- | ---AP---V   | ALSNPRE-KV |     |
| SpNR      | QCRLVSKTSL  | SHDVRFRFA   | LPAADQVLGL  | PVGKHI FLCA | LVDGKPCMR   | YTPSTDEEI  | GHFELLVKVY  | FKDVHPKFP  | 729 |
| OsNR3     | PCQLVDKKEL  | SRDVRFRFA   | LPSSDQVLGL  | PVGKHI FLCA | SIEGKLCMR   | YTPSTMVDEV | GHFDLLIKVY  | FKNEHPKFP  | 739 |
| OsNR2     | PCQLVDKKEL  | SRDVRFRFA   | LPSSDQVLGL  | PVGKHI FLCA | SIEGKLCMR   | YTPSTMVDEV | GHFDLLIKVY  | FKNEHPKFP  | 739 |
| SbNR2     | HCRLVGKKEL  | SRDVRFRFA   | LPSSDQVLGL  | PVGKHI FLCA | TIDGKLCMR   | YTPSTMVDEI | GHFDLLIKVY  | FKNEHPKFP  | 744 |
| HwNR2     | PCRLVDKKEL  | SHDVRFRFA   | LPSSDQVLGL  | PVGKHI FLCA | TIDGKLCMR   | YTPSTMVDEI | GHFDLLIKVY  | FKNEHPKFP  | 737 |
| BdNR2     | PCRLVDKKEL  | SHDVRFRFA   | LPSSDQVLGL  | PVGKHI FLCA | NIEGKLCMR   | YTPSTMVDEI | GHFDLLIKVY  | FKDEHPKFP  | 731 |
| SbNR3     | PCRLVAKTVL  | SRDVRFRFA   | LPSSGQVLGL  | PVGKHI FLCA | SIDGKLCMR   | YTPTSSVDEV | GHFDLLIKVY  | FKNEHPKFP  | 748 |
| OsNR1     | KCRLMDKKSL  | SYNVRFRFA   | LPSPDQKLGL  | PVGKHI FLCA | SIDGKLCMR   | YTPTSSVDEV | GYIELLIKVI  | FKGEDPKFP  | 712 |
| SbNR1     | RCRLVDKKSL  | SYNVRFRFA   | LPSPDQKLGL  | PVGKHI FLCA | SIDGKLCMR   | YTPTSPVDEV | GHIELLIKVI  | FKDEDPKYPN | 715 |
| HwNR1     | RCRLVDKKSL  | SHNVRFRFA   | LPSPHQKLGL  | PVGKHI FLCA | STGGKLCMR   | YTPTSSVEEV | GHVELLIKVI  | FKDEDPKFP  | 713 |
| BdNR1     | RCRLVGKKSV  | SRNVRFRFA   | LPSPDQKLGL  | PVGKHI FLCA | TTGGKLCMR   | YTPTSSPEES | GHVELLIKVI  | FKGEDPKFP  | 728 |
| AtNR2     | PVQLVEKTSI  | SHDVRFRFA   | LPVEDMVGL   | PVGKHI FLCA | TIDNKLCLRA  | YTPSTVDVV  | GHFELLVKVI  | FGGVHPRFPN | 743 |
| AtNR1     | PVRLIEKTSI  | SHDVRFRFA   | LPSEDQKLGL  | PVGKHI FLCA | NINDKLCLRA  | YTPSTAIDAV | GHIDLVLKVI  | FKDVHPRFPN | 743 |
| NnNR1     | PCKLICKTSI  | SHDVRFRFA   | LPSPDQVLGL  | PVGKHI FLCA | TIDNKLCLRA  | YTPTSSVDDV | GYFDLVKVIY  | FKGMNPKFPN | 731 |
| NnNR2     | ACKLVSKTSI  | SHDVRFRFA   | LPSPDQVLGL  | PVGKHI FLCA | TIDGKLCMR   | YTPTSSVDEV | GYFDLVKVIY  | FKGMNPKFPN | 732 |
| Consensus | PCRLVDKKSL  | SHDVRFRFA   | LPSSDQVLGL  | PVGKHI FLCA | XIDGKLCMR   | YTPTSSVDEV | GHFELLVKVIY | FKDEHPKFPN |     |



|           |             |             |             |            |            |            |            |             |     |
|-----------|-------------|-------------|-------------|------------|------------|------------|------------|-------------|-----|
|           |             | 820         |             | 840        |            | 860        |            | 880         |     |
| SpNR      | GGLMSQHLD   | SLPLGAA-VDV | KGPLGHI EYT | GGGNFSVNGE | RKRATKLAMI | AGGTGITPIY | QVMQAVLRD- | PEDDTEIHLV  | 807 |
| OsNR3     | GGLMTQYLD   | LPVGA-YIDV  | KGPLGHI EYT | GRGEFVINGK | PRNARRLAMI | AGGSGITPMY | QVIQSVLRDQ | PEDTTEMHLV  | 818 |
| OsNR2     | GGLMTQYLD   | LPVGA-YIDV  | KGPLGHI EYT | GRGEFVINGK | PRNARRLAMI | AGGSGITPMY | QVIQSVLRDQ | PEDTTEMHLV  | 818 |
| SbNR2     | GGLMTQYLD   | LPVGS-YIDV  | KGPLGHI EYT | GRGSFVINGK | QRHASRLAMI | CGGSGITPMY | QVIQAVLRDQ | PEDDTEMHV   | 823 |
| HvNR2     | GGLMTQYLD   | LQVGSYIDV   | KGPLGHI EYT | GRGNFVINGK | QRRARRLAMI | CGGSGITPMY | QVIQAVLRDQ | PEDETEMHV   | 817 |
| BdNR2     | GGLMTQHLE   | LQIGAS-IDV  | KGPLGHI EYT | GRGNFTINGK | ARHARRLAMI | CGGSGITPMY | QVIQAVLRDQ | PEDETEMHV   | 810 |
| SbNR3     | GGRMTQYLD   | LPIGAR-VDV  | KGPVGHIEY   | GRGGLVIDGE | PRRAGRLVMV | AGGSGITPIY | QVIQAVLRDQ | PEDDTEMHV   | 827 |
| OsNR1     | GGLMSQYLDY  | LPLGAT-IDI  | KGPIGHIEYA  | GRGAFTVNGE | RRFARRLAMI | AGGTGITPVY | QVIQAVLRDQ | PDDGTEMHV   | 791 |
| SbNR1     | GGLMSQYLD   | LPLGAT-IDI  | KGPIGHIEYA  | GRGGFVNGE  | RRFARRLAMI | AGGTGITPVY | QVIQAVLRDQ | PDDTEMHV    | 794 |
| HvNR1     | GGLMSQYLD   | LPLGAP-VDI  | KGPVGHIEYA  | GRGAFTVNGE | RRFARRLAMI | AGGTGITPVY | QVIQAVLRDQ | PDDTTEMHLV  | 792 |
| BdNR1     | GGLMSQYLD   | LPLGAC-VDI  | KGPVGHIEY   | GRGEFVNGE  | RRVARRLAMI | AGGTGITPVY | QVIQAVLRDQ | -EDGTEMHV   | 806 |
| ANR2      | GGLMSQYLD   | LPIGST-LEI  | KGPLGHI EYT | GKGSFTVHGK | PKFADKLAML | AGGTGITPVY | QIIQAILKD- | PEDETEMYVI  | 821 |
| ANR1      | GGLMSQHLD   | LPIGSM-IDI  | KGPLGHI EYT | GKGNFLVSGK | PKFAKKLAML | AGGTGITPIY | QIIQSILSD- | PEDETEMYVV  | 821 |
| NnNR1     | GGLMSQYLD   | LSLGST-VNV  | KGPLGHI EYT | GKGSFTVHGK | PKFAKKLAML | AGGTGITPIY | QVIQAILRD- | PEDDTEMYVV  | 809 |
| NnNR2     | GGLMSQYLD   | LPLEST-LDV  | KGPLGYIEY   | GRGNFTVHGK | AKFAKKLAMI | AGGTGITPIY | QVIQAILKD- | PEDDTEMYVV  | 810 |
| Consensus | GGLMSQYLD   | LPLGAT-IDV  | KGPLGHI EYT | GRGNFVNGK  | PRFARRLAMI | AGGTGITPXV | QVIQAVLRDQ | PEDETEMHV   |     |
|           |             | 900         |             | 920        |            | 940        |            | 960         |     |
| SpNR      | YANRTEDDIL  | LREELDGWAK  | ERSEQVQVWY  | VVGETK--DP | GWSYSGVFVT | EEILRQRVPA | AAA-DVLALA | CGPPPMQLQFA | 884 |
| OsNR3     | YANRTEDDIL  | LRDELDRWAA  | EYDRLKQWY   | VIDQVKRPEE | GWKYSGVFVT | EEVLRHVPE  | GGD-DTLALA | CGPPPMIKFA  | 897 |
| OsNR2     | YANRTEDDIL  | LRDELDRWAA  | EYDRLKQWY   | VIDQVKRPEE | GWKYSGVFVT | EEVLRHVPE  | GGD-DTLALA | CGPPPMIKFA  | 897 |
| SbNR2     | YANRTEDDIL  | LRDELDRWAA  | EYDRLKQWY   | VIDQVKRPEE | GWKYSGVFVT | EAVLRHVPE  | GGD-DTLALA | CGPPPMIQFA  | 902 |
| HvNR2     | YANRSEDDIL  | LRDELDRWAA  | EYDRLKQWY   | VIDQVKRPEE | GWKFSVGFVT | EDILRAHVPE | GGD-DTLALA | CGPPPMIKFA  | 896 |
| BdNR2     | YANRTEDDIL  | LRDELDRWAA  | EYDRLKQWY   | VIDQVKRPEE | GWKFSVGFVT | EAILREHVPE | GGD-DTLALA | CGPPPMIKFA  | 889 |
| SbNR3     | YANRTEDDIL  | LRGELDRWAA  | EYDRLKQWY   | VISQVKRPEE | -WKYSVGVVT | EAILREHVPE | GGD-GTLALV | CGPPMLIQFA  | 905 |
| OsNR1     | YANRTEDDML  | LREEIDRWAA  | AHPARLKQWY  | VVSKVARPED | GWEYGVGRVD | ERTLREHLP  | G-DGETLALV | CGPPAMVECT  | 870 |
| SbNR1     | YANRTEDDML  | LREEIDRWAA  | AHPARLKQWY  | VVSKVARPED | GWAYGVGRVD | EQVLRHLP   | G-DSETLALV | CGPPAMIECT  | 873 |
| HvNR1     | YANRTEDDML  | LREEIDRWAA  | ANPARLKQWY  | VVSKVGRPED | AWEYGVGRVD | EQVLRHLP   | GGDGETLALV | CGPPAMLECT  | 872 |
| BdNR1     | YANRTEDDML  | LREEIDRWAA  | EHPGRLKQWY  | VVSNVARPED | SWEYGVGRVD | ERVLRHLP   | GGDGETLALV | CGPPAMIECT  | 886 |
| ANR2      | YANRTEEDIL  | LREELDGWAE  | QYPDRLKQWY  | VV-ESAK--E | GWAYSTGFIS | EAIMREHLP  | GLDGSALAMA | CGPPPMIQFA  | 898 |
| ANR1      | YANRTEDDIL  | LREELDGWAE  | KHKERLKIWY  | VV-EIAK--E | GWSYSTGFIT | EAVLRHLP   | GLEGSALAMA | CGPPPMIQFA  | 898 |
| NnNR1     | YANRTEDDIL  | LREELDGWAE  | KH-ERLKQWY  | VVGKALR--E | GWKYSEGLIT | ESVLRHLP   | G-SSDTLALA | CGPPPMIQFA  | 885 |
| NnNR2     | YANRTEDDIL  | LREELDGWAE  | KN-ERLKQWY  | VVGESLR--E | GWKYSGVFIT | ENILREHLP  | G-SSDTLALA | CGPPPMIQFA  | 886 |
| Consensus | YANRTEDDIL  | LREELDRWAA  | EYDRLKQWY   | VVXQVKRPEE | GWKYSGVFVT | EAVLRHVPE  | GGD-DTLALA | CGPPPMIQFA  |     |
|           |             |             |             |            |            |            |            |             |     |
| SpNR      | VVPNLEKMGY  | DVKNALQF    | 903         |            |            |            |            |             |     |
| OsNR3     | VSPNLEKMKY  | DMANSFIVF   | 916         |            |            |            |            |             |     |
| OsNR2     | VSPNLEKMKY  | DMANSFIVF   | 916         |            |            |            |            |             |     |
| SbNR2     | VSPNLEKMNY  | DMANSFVVF   | 921         |            |            |            |            |             |     |
| HvNR2     | ISP NLEKMKY | DMANSFISF   | 915         |            |            |            |            |             |     |
| BdNR2     | ISP NLEKMKY | DMANSFISF   | 908         |            |            |            |            |             |     |
| SbNR3     | VSPNLEKMKH  | HVD-SVIVF   | 923         |            |            |            |            |             |     |
| OsNR1     | VRPGLEKMGY  | DLDKSCLVF   | 889         |            |            |            |            |             |     |
| SbNR1     | VRPGLEKMGY  | DLDKACLVF   | 892         |            |            |            |            |             |     |
| HvNR1     | VRPGLEKMGY  | DLDKDCLVF   | 891         |            |            |            |            |             |     |
| BdNR1     | VRPALEKMGY  | DLDKSCLVF   | 905         |            |            |            |            |             |     |
| ANR2      | VQPNLEKMQY  | NIKEDFLIF   | 917         |            |            |            |            |             |     |
| ANR1      | LQPNLEKMGY  | NVKEDLLIF   | 917         |            |            |            |            |             |     |
| NnNR1     | VVPNLEKMKY  | DVKESLLVF   | 904         |            |            |            |            |             |     |
| NnNR2     | VVPNLEKMNY  | DVKESLLVF   | 905         |            |            |            |            |             |     |
| Consensus | VSPNLEKMXV  | DXXNSFLVF   |             |            |            |            |            |             |     |

**B**

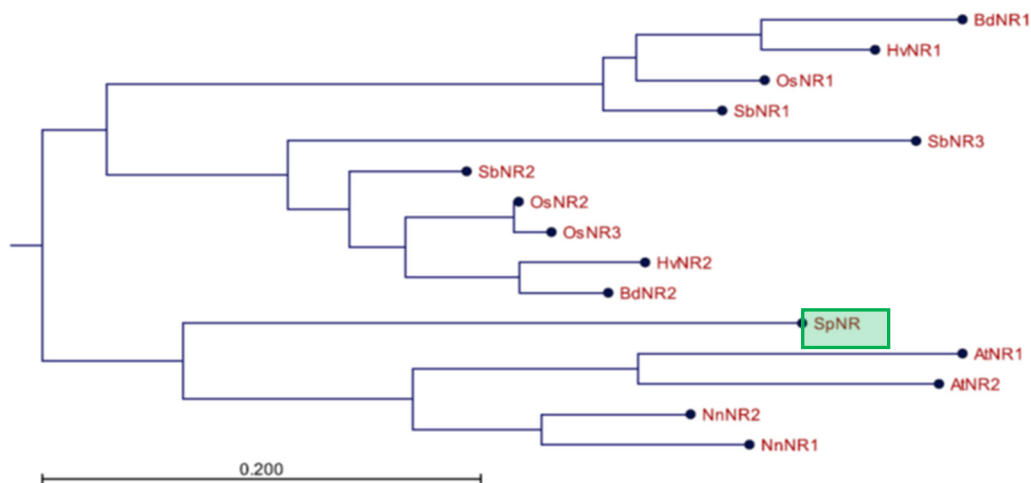

**Figure S5.** Sequence alignment of NR protein from *S. polyrhiza* with other representative species (A) and the resulting proteins phylogenetic tree (B). AtNR1 – *A. thaliana*, NP\_177899.1; AtNR2 – *A. thaliana*, NP\_174901.1; BdNR1 – *B. distachyon*, XP\_003570548.1; BdNR2 – *B. distachyon*, XP\_003574607.1; HvNR1 – *H. vulgare*, KAE8814139; HvNR2 – *H. vulgare*, KAE8794287; NnNR1 – *N. nucifera*, XP\_010246478; NnNR2 – *N. nucifera*, XP\_010245911; OsNR1 – *O. sativa*, XP\_015622710.1; OsNR2 – *O. sativa*, XP\_015650300.1; OsNR3 – *O. sativa*, XP\_015650643.1; SbNR1 – *S. bicolor*, XP\_002454625.1; SbNR2 – *S. bicolor*, XP\_002444490.1; SbNR3 – *S. bicolor*, XP\_002454083.1; SpNR – *S. polyrhiza* (sequence translated from Acc. OL421561)

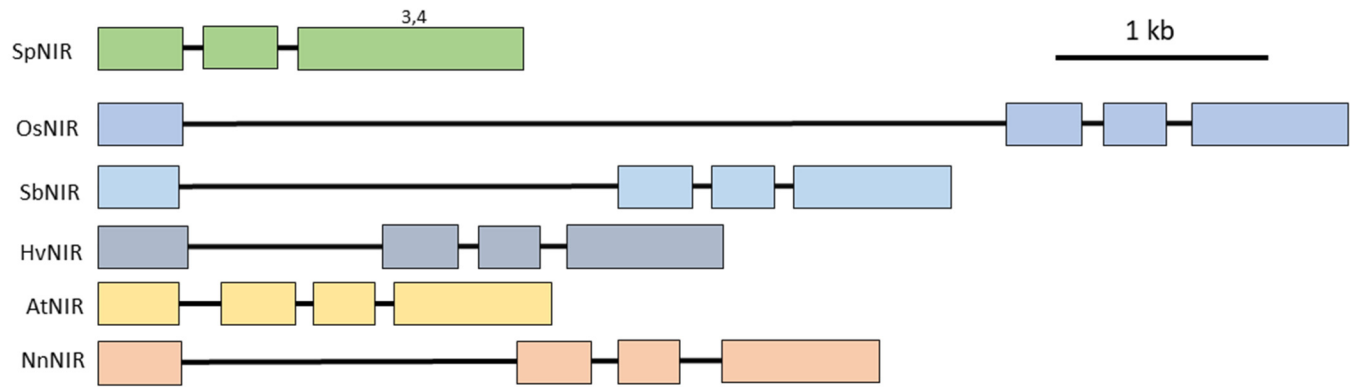

**Figure S6.** Comparison of the exon-intron structures between *NIR* genes of *S. polyrhiza* and other representative plant species. *AtNIR* – *A. thaliana*, At2g15620; *NnNIR* – *N. nucifera*, LOC104601782; *OsNIR* – *O. sativa*, LOC4326014; *SbNIR* – *S. bicolor*, LOC8075200, *SpNIR* – *S. polyrhiza* CP019094, the 18<sup>th</sup> chromosome, position from 2760613 to 2758617. Coding sequences are colored boxes. Introns are black lines. The bar corresponds to 1kb of DNA sequence.



A

|           |            |             |            |             |             |             |             |             |     |
|-----------|------------|-------------|------------|-------------|-------------|-------------|-------------|-------------|-----|
|           |            | 20          |            | 40          |             | 60          |             | 80          |     |
| SpNIR     | -MSSSAVH-- | LSMPSWQAVR  | RQRR----RG | PAVLATATPT  | AAPAAPQPPA  | PPEDGA-EVS  | RLEPRVEQRE  | GGYWVLKEKF  | 72  |
| OsNIR     | MASSASLQRF | L--PPYPHAA  | ASRC----RP | PGVRARPVQS  | STVSAPSSST  | PAADEAVSAE  | RLEPRVEQRE  | GRYWVLKEKY  | 74  |
| SbNIR     | MASSASLQRF | LPSSSHAATA  | SSSR----RR | TG-RARAAYS  | MPPSSP----  | -PATGEVPAE  | RLEPRVEERE  | GGYWVLKEKY  | 70  |
| HvNIR     | MASSASLQSF | LP-PSAHAAT  | SSSRLRPSRA | RPVQCAAV--  | SAPSSSSSSA  | SPSASAVPSE  | RLEPRVEQRE  | GGYWVLKEKY  | 77  |
| BdNIR     | MASSASLQRF | LPSSAHSTPS  | SSQRGRRARR | PVLQCSAVSA  | PSSSSPAPAA  | ---GAVAAE   | RLEPRVEQRE  | GGYWVLKEKY  | 76  |
| AtNIR     | -MTSFSLTF- | -TSPLLPSSS  | TKPK----R- | -SVLVAQAQT  | TAPAE-----  | -STASVDAD   | RLEPRVELKD  | G-FFILKEKF  | 63  |
| NnNIR     | -MSSSFRFL  | APSVPSSSSM  | RRTR----RG | ARAPAAATPS  | QAEA-----   | PSVAKEVDGS  | RLEPRVEERE  | G-YWVLKEKF  | 68  |
| Consensus | MASSASLQRF | LPXPSHXAXX  | SSXR----RX | PGVXAAAVXS  | SAPSSP----A | PPXXGAVXAE  | RLEPRVEQRE  | GGYWVLKEKY  |     |
|           |            | 100         |            | 120         |             | 140         |             | 160         |     |
| SpNIR     | RPGINPQEKV | KLEKEPMALF  | MEGGIRDLAA | TPLEDIEASK  | LSKDDIDVRL  | KWLGLFHRRK  | HQYGRFMMRL  | KLPNGVTTSE  | 152 |
| OsNIR     | RTGLNPQEKV | KLGEKPMSLF  | MEGGIKELAK | MPMEEIEADK  | LSKEDIDVRL  | KWLGLFHRRK  | HQYGRFMMRL  | KLPNGVTTSE  | 154 |
| SbNIR     | RTGLNPQEKV | KLEKEPMGLF  | MEDGIKDLAK | IPMEEIDAK   | LTKDDVDVRL  | KWLGLFHRRK  | HQYGRFMMRL  | KLPNGVTTSE  | 150 |
| HvNIR     | RTSLNPQEKV | KLGEKPMALF  | TEGGINDLAK | LPMEQIDADK  | LTKEVDVRL   | KWLGLFHRRK  | QQYGRFMMRL  | KLPNGVTTSE  | 157 |
| BdNIR     | RTGLNPQEKV | KLGEKPMALF  | TESGIRDLAK | IPMAEIDADK  | LAKEDVDVRL  | KWLGLFHRRK  | QQYGRFMMRL  | KLPNGVTTSE  | 156 |
| AtNIR     | RKGINPQEKV | KIEREPMKLF  | MENGEELAK  | KSMEEIDSEK  | SSKDDIDVRL  | KWLGLFHRRK  | HQYGRFMMRL  | KLPNGVTTSE  | 143 |
| NnNIR     | RQGINPQEKV | KLEREPMKLF  | MEGGINELAK | TPLQEI EKSK | LTKDDIDVRL  | KWLGLFHRRK  | HQYGRFMMRL  | KLPNGVTTSE  | 148 |
| Consensus | RTGLNPQEKV | KLEKEPMALF  | MEGGIXDLAK | XPMEEIDADK  | LXKDDIDVRL  | KWLGLFHRRK  | HQYGRFMMRL  | KLPNGVTTSE  |     |
|           |            | 180         |            | 200         |             | 220         |             | 240         |     |
| SpNIR     | QIRYLAGVIE | AYGEDGCADV  | TTRQNWQIRG | VRLPDVPAIL  | DGLAGVGLSS  | LQSGMDNVNR  | PVGNPFLAGD  | PHEIVDTRPY  | 232 |
| OsNIR     | QTRYLASVIE | AYGKEGCADV  | TTRQNWQIRG | VTLPDVPAIL  | DGLNAVGLTS  | LQSGMDNVNR  | PVGNPFLAGD  | PDEIVDTRSY  | 234 |
| SbNIR     | QTRYLASVIE | AYGADGCADV  | TTRQNWQIRG | VTLPDVPAIL  | DGLRAVGLTS  | LQSGMDNVNR  | PVGNPFLAGD  | PHEIVDTRPY  | 230 |
| HvNIR     | QTRYLASVID | KYGEEGCADV  | TTRQNWQIRG | VTLPDVPEIL  | DGLRSVGLTS  | LQSGMDNVNR  | PVGSPFLAGD  | PDEIVDTRPY  | 237 |
| BdNIR     | QTRYLASVID | KYGEEGCADV  | TTRQNWQIRG | VTLPDVPEIL  | DGLHSVGLTS  | LQSGMDNVNR  | PVGNPFLAGD  | PDEIVDTRPY  | 236 |
| AtNIR     | QTRYLASVIR | KYGEDGCADV  | TTRQNWQIRG | VTLPDVPEIL  | KGLASVGLTS  | LQSGMDNVNR  | PVGNPFLAGD  | PHEIVDTRPY  | 223 |
| NnNIR     | QTRCLASVIR | KYGEKGCADV  | TTRQNWQIRG | VELPDVPEIM  | EDLVRVGLTS  | LQSGMDNVNR  | PVGNPFLAGD  | PHEIVDTRPY  | 228 |
| Consensus | QTRYLASVIE | KYGEEGCADV  | TTRQNWQIRG | VTLPDVPXIL  | DGLXSVGLTS  | LQSGMDNVNR  | PVGNPFLAGD  | PHEIVDTRPY  |     |
|           |            | 260         |            | 280         |             | 300         |             | 320         |     |
| SpNIR     | ANLLSQFITG | NDRGNPAVTN  | LPRKWNACVV | GSHDLYEHPH  | INDLAYMPAT  | KEGRFGFNLL  | VGGFISPKRW  | AEAVPLDAWV  | 312 |
| OsNIR     | TNLLSSYITS | NFGQNTITN   | LPRKWNVCVI | GSHDLYEHPH  | INDLAYMPAV  | KGKFGFNLL   | VGGFISPKRW  | EEALPLDAWV  | 314 |
| SbNIR     | TNLLSSYITN | NSQGNNTITN  | LPRKWNVCVI | GSHDLYEHPH  | INDLAYMPAV  | KDGKFGFNLL  | VGGFISPKRW  | AEALPLDAWV  | 310 |
| HvNIR     | TNLLSSYITN | NSEGNLAITN  | LPRKWNVCVI | GTHDLYEHPH  | INDLAYMPAE  | KDGKFGFNLL  | VGGFISPKRW  | GEALPLDAWV  | 317 |
| BdNIR     | TNLLSSYITN | NSQGNLAVTN  | LPRKWNVCVI | GSHDLYEHPH  | INDLAYMPAE  | KDGKFGFNLL  | VGGFISPKRW  | GEALPLDAWV  | 316 |
| AtNIR     | TNLLSQFITA | NSQGNPDFTN  | LPRKWNVCVV | GTHDLYEHPH  | INDLAYMPAN  | KDGRFGFNLL  | VGGFFSPKRC  | EEAIPLDWV   | 303 |
| NnNIR     | TNLLSHFITG | NSGGNPAVTN  | LPRKWNVCVV | GSHDLFEHPP  | INDLAYMPAT  | KDGRFGFNLL  | VGGFFSPKRC  | AEAVPLDAWV  | 308 |
| Consensus | TNLLSSYITN | NSQGNPAXTN  | LPRKWNVCVI | GSHDLYEHPH  | INDLAYMPAX  | KDGKFGFNLL  | VGGFISPKRW  | AEALPLDAWV  |     |
|           |            | 340         |            | 360         |             | 380         |             | 400         |     |
| SpNIR     | PGEDVVPVCR | AVLEAYRDLG  | TRGNRQKTRM | MWLIDELGIE  | AFRAEVERRM  | PQGVLPRGAS  | PAEELVKKDW  | LRRDYLGVHP  | 392 |
| OsNIR     | PGDDIIPVCK | AVLEAYRDLG  | TRGNRQKTRM | MWLIDELGME  | AFRSEVEKRM  | PNGVLERAAP  | --EDLIDKKW  | QRRDYLGVHP  | 392 |
| SbNIR     | AGDDVVPVCR | AILEAYRDLG  | FRGNRQKTRM | MWLIDELGME  | VFRSEVEKRM  | PNGVLERAAP  | --AEDLVDKTW | ERRDYLGVHP  | 388 |
| HvNIR     | PGDDIIPVCK | AVLEAYRDLG  | TRGNRQKTRM | MWLIDELGME  | AFRSEIEKRM  | PNGVLERAAP  | --EDLIDKKW  | ERRDYLGVHP  | 395 |
| BdNIR     | PGDDIIPVCK | AILEAYRDLG  | TRGNRQKTRM | MWLIDELGME  | VFRSEIEKRM  | PQGVLERAA-  | --AEDMIDKAW | ERRDYLGVHP  | 394 |
| AtNIR     | PADDVLPCK  | AVLEAYRDLG  | TRGNRQKTRM | MWLIDELGVE  | GFRTEVEKRM  | PNGKLERGS-  | --SEDLVNKKW | ERRDYFGVHP  | 381 |
| NnNIR     | PADDVVPVCK | AVLEAYRDLG  | TRGNRQKTRM | MWLIDELGVE  | GFRAEVVKRM  | PQGLERSS-   | --EEDLVQKQW | ERRDYLGVHP  | 386 |
| Consensus | PGDDVXPVCK | AVLEAYRDLG  | TRGNRQKTRM | MWLIDELGME  | AFRSEVEKRM  | PNGVLERAAP  | --AEDLVDKXW | ERRDYLGVHP  |     |
|           |            | 420         |            | 440         |             | 460         |             | 480         |     |
| SpNIR     | QKQQLCFVVG | LHVPVGRVQA  | SDMFELARLA | DEYGTGELRL  | TVEQNVVIPN  | VPEGRVAALL  | EEPLLQERFL  | PEPSALMRGL  | 472 |
| OsNIR     | QKQEGMSYVG | LHVPVGRVQA  | ADMFELARLA | DEYSGELRL   | TVEQNIIVIPN | VKNEKVEALL  | SEPLLQ-KFS  | PQPSLLMKGL  | 471 |
| SbNIR     | QKQEGLSYVG | LHVPVGRVQA  | ADMFELARLA | DEYGTGELRL  | TVEQNIIVLPN | VSNERVEDALL | AEPLLQRQFS  | PEPSLLMKGL  | 468 |
| HvNIR     | QKQEGLSFVG | LHVPVGRVQA  | ADMFELARLA | DEYSGELRL   | TVEQNIIVLPN | VKNEKVDALL  | AEPLLQ-KHFS | AHPSLLMKGL  | 474 |
| BdNIR     | QKQQLSFGV  | LHVPVGRVQA  | ADMYSLARLA | DEYSGELRL   | TVEQNIIVLPN | VPNDKIPSL   | AEPLLQ-KFS  | AQPSLLMKGL  | 473 |
| AtNIR     | QKQEGLSFVG | LHVPVGRVQA  | DDMDLARLA  | DTYSGELRL   | TVEQNIIVIPN | VETSKTEALL  | QEPFLKNRFS  | PEPSILMKGL  | 461 |
| NnNIR     | QKQEGFSFVG | LHVPVGRVQA  | EEMDELARLA | DEYSGELRL   | TVEQNVVIPN  | VENSKLEALL  | KEPLLNRNFS  | PEPSLLMKGL  | 466 |
| Consensus | QKQEGLSFVG | LHVPVGRVQA  | ADMFELARLA | DEYSGELRL   | TVEQNIIVIPN | VXNEKVEALL  | AEPLLQNRFS  | PEPSLLMKGL  |     |
|           |            | 500         |            | 520         |             | 540         |             | 560         |     |
| SpNIR     | VACTGNQFCG | QAI IETKARA | VRVAEETERR | VALPAGKSVR  | MHWTGCPNSC  | AQVQVADIGF  | MGCMDARDAAG | KVCEAVDIYLV | 552 |
| OsNIR     | VACTGNQFCG | QAI IETKQRA | LLVTSQVEKL | VSVP--RAVR  | MHWTGCPNSC  | GQVQVADIGF  | MGCLTKDSAG  | KIVEAADIFV  | 549 |
| SbNIR     | VACTGNQFCG | QAI IETKARA | LQVTRVEKR  | VSVP--RPVR  | MHWTGCPNSC  | GQVQVADIGF  | MGCLTKDSDG  | KIVEAADIFV  | 546 |
| HvNIR     | VACTGNQFCG | QAI IETKARA | LQVTRDVEAR | VSVP--KAVR  | MHWTGCPNSC  | AQVQVADIGF  | MGCLTKNSSG  | KIVEAADIFV  | 552 |
| BdNIR     | VACTGNQFCG | QAI IETKARA | LRVTRDVERR | VSVP--RAVR  | MHWTGCPNSC  | AQVQVADIGF  | MGCLTKNGSG  | KIVEAADIFV  | 551 |
| AtNIR     | VACTGSQFCG | QAI IETKLRA | LKVTEEVERL | VSVP--RPVR  | MHWTGCPNTC  | GQVQVADIGF  | MGCLTRGEEG  | KPVEGADVYV  | 539 |
| NnNIR     | VACTGNQFCG | QAI IETKARA | LKVTEEVERR | VAVT--RPVR  | MHWTGCPNSC  | GQVQVADIGF  | MGCMTRDENG  | KACEGVDVFL  | 544 |
| Consensus | VACTGNQFCG | QAI IETKARA | LXVTXEVERR | VSVP--RXVR  | MHWTGCPNSC  | GQVQVADIGF  | MGCLTKDSXG  | KIVEAADIFV  |     |
|           |            | 580         |            | 600         |             |             |             |             |     |
| SpNIR     | GGRVGSDSHL | GSVYKKGVPC  | KDLVPVLVDI | LVERFGAVPR  | QREDDDEEEE  | ER          |             |             | 604 |
| OsNIR     | GGRVGSDSHL | AGAYKKSVPC  | DELAPIVADI | LVERFGAVRR  | EREDEEE---  | --          |             |             | 596 |
| SbNIR     | GGRVGSDSHL | ADVYKKSVPC  | KDLVPIVADL | LVERFGAVPR  | EREDEEE---  | --          |             |             | 593 |
| HvNIR     | GGRIGSDSHL | TGVYKKAVPC  | EDLVPIVADL | LVERFGAVPR  | EREDEEE---  | --          |             |             | 599 |
| BdNIR     | GGRVGSDSHL | TGVWKKAVPC  | EDLVPIVADL | LVERFGAVPR  | EREDEEE---  | --          |             |             | 598 |
| AtNIR     | GGRIGSDSHI | GEIYKKGVRV  | TELVPVVAEI | LIFKFGAVPR  | EREENED---  | --          |             |             | 586 |
| NnNIR     | GGRIGSDSHL | GDVYKKSVPC  | KDLVPLVVDI | LINHFGAVPR  | DREEEGED--- | --          |             |             | 592 |
| Consensus | GGRVGSDSHL | GGVYKKSVPC  | KDLVPIVADI | LVERFGAVPR  | EREDEEE---  | --          |             |             |     |

B

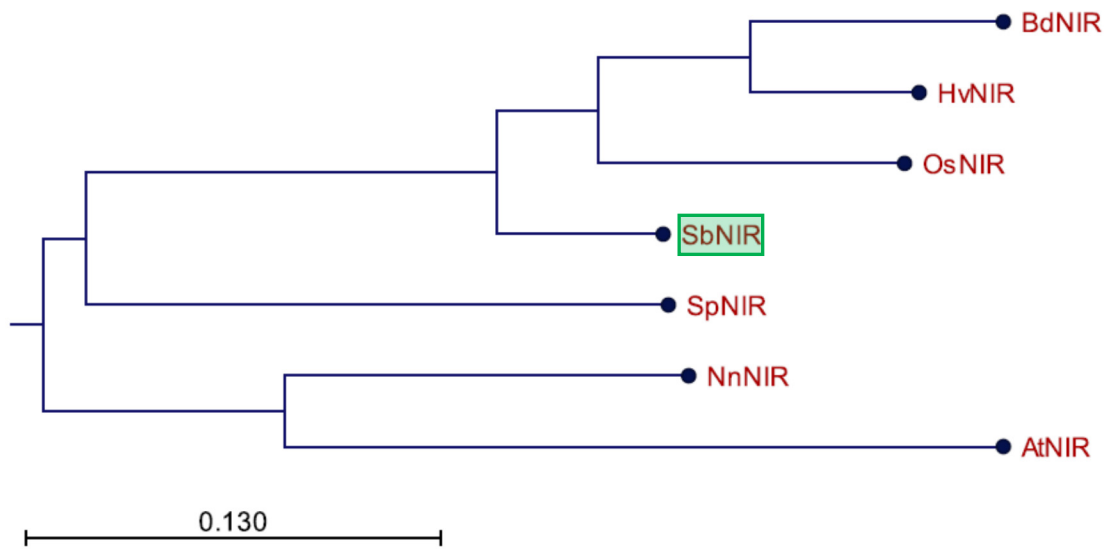

**Figure S7.** Sequence alignment of NIR protein from *S. polyrhiza* with other representative species (A) and the resulted phylogenetic tree (B).; AtNIR – *A. thaliana*, NP\_179164; BdNIR - *B. distachyon*, XP\_003570568; HvNIR - *H. vulgare*, BAW00383; NnNIR - *N. nucifera*, XP\_010263547; OsNIR - *O. sativa*, XP\_015641702.1; Sb NIR - *S. bicolor*, XP\_002454602; SpNIR - *S. polyrhiza* (sequence translated from Acc. OL421562)

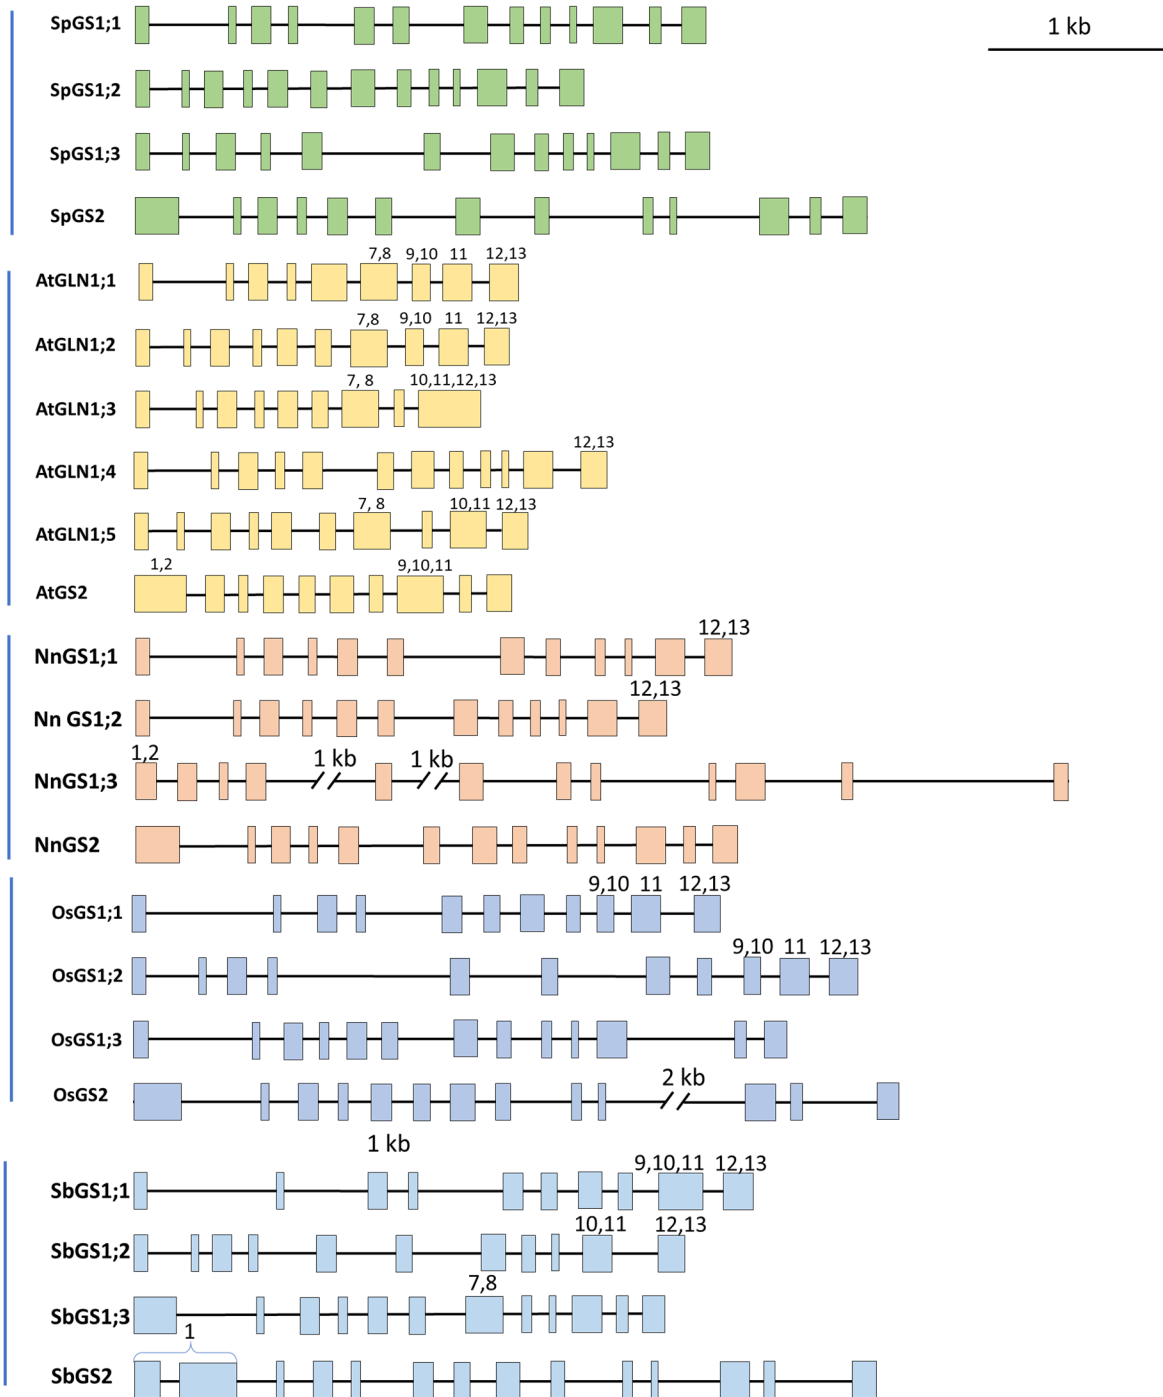

**Figure S8.** Comparison of the exon-intron structures between GS genes of *S. polyrhiza* and other representative plant species. *AtGln1;1* – *A. thaliana*, At5g37600); *AtGln1;2* – *A. thaliana*, At1G66200; *AtGln1;3* – *A. thaliana*, At3g17820; *AtGln1;4* – *A. thaliana*, At5g16570; *AtGln1;5* – *A. thaliana*, At1g48470; *AtGS2* – *A. thaliana*, At5g35630; *NnGS1;1* – *N. nucifera*, LOC104607411; *NnGS1;2* – *N. nucifera*, LOC104607404; *NnGS1;3* – *N. nucifera*, LOC104592454; *NnGS2* – *N. nucifera*, LOC104596403, *OsGS1;1* – *O. sativa*, LOC4330649, *OsGS1;2* – *O. sativa*, LOC4332108, *OsGS1;3* – *O. sativa*, LOC4333896, *OsGS2* – *O. sativa*, LOC4337272, *SbGS1;1* – *S. bicolor*, LOC110434374, *SbGS1;2* – *S. bicolor*, LOC8056868, *SbGS1;3* – *S. bicolor*, LOC110431761, *SbGS2* – *S. bicolor*, LOC110436381, *SpGS1;1* – *S. polyrhiza* CP019094, the 7<sup>th</sup> chromosome, position from 6306673 to 6309664, *SpGS1;2* – *S. polyrhiza* CP019094, the 18<sup>th</sup> chromosome, position from 1351512 to 1353850, *SpGS1;3* – *S. polyrhiza* CP019094, the 14<sup>th</sup> chromosome, position from 1601445 to 1604468, *SpGS2* – *S. polyrhiza* CP019094, the 1<sup>st</sup> chromosome, position from 4942769 to 4946754. Coding sequences are represented by colored boxes, introns are black lines. The bar corresponds to 1kb of DNA sequence.



A

|  |  |  |  |    |  |  |  |  |  |    |  |  |  |  |  |  |  |  |  |  |  |  |  |  |  |  |  |  |  |  |  |  |  |  |  |  |  |  |  |  |  |  |  |  |  |  |  |  |  |  |  |  |  |  |  |  |  |  |  |  |  |  |  |  |  |  |  |  |  |  |  |  |  |  |  |  |  |  |  |  |  |  |  |  |  |  |  |  |  |  |  |  |  |  |  |  |  |  |  |  |  |  |  |  |  |  |  |  |  |  |  |  |  |  |  |  |  |  |  |  |  |  |  |  |  |  |  |  |  |  |  |  |  |  |  |  |  |  |  |  |  |  |  |  |  |  |  |  |  |  |  |  |  |  |  |  |  |  |  |  |  |  |  |  |  |  |  |  |  |  |  |  |  |  |  |  |  |  |  |  |  |  |  |  |  |  |  |  |  |  |  |  |  |  |  |  |  |  |  |  |  |  |  |  |  |  |  |  |  |  |  |  |  |  |  |  |  |  |  |  |  |  |  |  |  |  |  |  |  |  |  |  |  |  |  |  |  |  |  |  |  |  |  |  |  |  |  |  |  |  |  |  |  |  |  |  |  |  |  |  |  |  |  |  |  |  |  |  |  |  |  |  |  |  |  |  |  |  |  |  |  |  |  |  |  |  |  |  |  |  |  |  |  |  |  |  |  |  |  |  |  |  |  |  |  |  |  |  |  |  |  |  |  |  |  |  |  |  |  |  |  |  |  |  |  |  |  |  |  |  |  |  |  |  |  |  |  |  |  |  |  |  |  |  |  |  |  |  |  |  |  |  |  |  |  |  |  |  |  |  |  |  |  |  |  |  |  |  |  |  |  |  |  |  |  |  |  |  |  |  |  |  |  |  |  |  |  |  |  |  |  |  |  |  |  |  |  |  |  |  |  |  |  |  |  |  |  |  |  |  |  |  |  |  |  |  |  |  |  |  |  |  |  |  |  |  |  |  |  |  |  |  |  |  |  |  |  |  |  |  |  |  |  |  |  |  |  |  |  |  |  |  |  |  |  |  |  |  |  |  |  |  |  |  |  |  |  |  |  |  |  |  |  |  |  |  |  |  |  |  |  |  |  |  |  |  |  |  |  |  |  |  |  |  |  |  |  |  |  |  |  |  |  |  |  |  |  |  |  |  |  |  |  |  |  |  |  |  |  |  |  |  |  |  |  |  |  |  |  |  |  |  |  |  |  |  |  |  |  |  |  |  |  |  |  |  |  |  |  |  |  |  |  |  |  |  |  |  |  |  |  |  |  |  |  |  |  |  |  |  |  |  |  |  |  |  |  |  |  |  |  |  |  |  |  |  |  |  |  |  |  |  |  |  |  |  |  |  |  |  |  |  |  |  |  |  |  |  |  |  |  |  |  |  |  |  |  |  |  |  |  |  |  |  |  |  |  |  |  |  |  |  |  |  |  |  |  |  |  |  |  |  |  |  |  |  |  |  |  |  |  |  |  |  |  |  |  |  |  |  |  |  |  |  |  |  |  |  |  |  |  |  |  |  |  |  |  |  |  |  |  |  |  |  |  |  |  |  |  |  |  |  |  |  |  |  |  |  |  |  |  |  |  |  |  |  |  |  |  |  |  |  |  |  |  |  |  |  |  |  |  |  |  |  |  |  |  |  |  |  |  |  |  |  |  |  |  |  |  |  |  |  |  |  |  |  |  |  |  |  |  |  |  |  |  |  |  |  |  |  |  |  |  |  |  |  |  |  |  |  |  |  |  |  |  |  |  |  |  |  |  |  |  |  |  |  |  |  |  |  |  |  |  |  |  |  |  |  |  |  |  |  |  |  |  |  |  |  |  |  |  |  |  |  |  |  |  |  |  |  |  |  |  |  |  |  |  |  |  |  |  |  |  |  |  |  |  |  |  |  |  |  |  |  |  |  |  |  |  |  |  |  |  |  |  |  |  |  |  |  |  |  |  |  |  |  |  |  |  |  |  |  |  |  |  |  |  |  |  |  |  |  |  |  |  |  |  |  |  |  |  |  |  |  |  |  |  |  |  |  |  |  |  |  |  |  |  |  |  |  |  |  |  |  |  |  |  |  |  |  |  |  |  |  |  |  |  |  |  |  |  |  |  |  |  |  |  |  |  |  |  |  |  |  |  |  |  |  |  |  |  |  |  |  |  |  |  |  |  |  |  |  |  |  |  |  |  |  |  |  |  |  |  |  |  |  |  |  |  |  |  |  |  |  |  |  |  |  |  |  |  |  |  |  |  |  |  |  |  |  |  |  |  |  |  |  |  |  |  |  |  |  |  |  |  |  |  |  |  |  |  |  |  |  |  |  |  |  |  |  |  |  |  |  |  |  |  |  |  |  |  |  |  |  |  |  |  |  |  |  |  |  |  |  |  |  |  |  |  |  |  |  |  |  |  |  |  |  |  |  |  |  |  |  |  |  |  |  |  |  |  |  |  |  |  |  |  |  |  |  |  |  |  |  |  |  |  |  |  |  |  |  |  |  |  |  |  |  |  |  |  |  |  |  |  |  |  |  |  |  |  |  |  |  |  |  |  |  |  |  |  |  |  |  |  |  |  |  |  |  |  |  |  |  |  |  |  |  |  |  |  |  |  |  |  |  |  |  |  |  |  |  |  |  |  |  |  |  |  |  |  |  |  |  |  |  |  |  |  |  |  |  |  |  |  |  |  |  |  |  |  |  |  |  |  |  |  |  |  |  |  |  |  |  |  |  |  |  |  |  |  |  |  |  |  |  |  |  |  |  |  |  |  |  |  |  |  |  |  |  |  |  |  |  |  |  |  |  |  |  |  |  |  |  |  |  |  |  |  |  |  |  |  |  |  |  |  |  |  |  |  |  |  |  |  |  |  |  |  |  |  |  |  |  |  |  |  |  |  |  |  |  |  |  |  |  |  |  |  |  |  |  |  |  |  |  |  |  |  |  |  |  |  |  |  |  |  |  |  |  |  |  |  |  |  |  |  |  |  |  |  |  |  |  |  |  |  |  |  |  |  |  |  |  |  |  |  |  |  |  |  |  |  |  |  |  |  |  |  |  |  |  |  |  |  |  |  |  |  |  |  |  |  |  |  |  |  |  |  |  |  |  |  |  |  |  |  |  |  |  |  |  |  |  |  |  |  |  |  |  |  |  |  |  |  |  |  |  |  |  |  |  |  |  |  |  |  |  |  |  |  |  |  |  |  |  |  |  |  |  |  |  |  |  |  |  |  |  |  |  |  |  |  |  |  |  |  |  |  |  |  |  |  |  |  |  |  |  |  |  |  |  |  |  |  |  |  |  |  |  |  |  |  |  |  |  |  |  |  |  |  |  |  |  |  |  |  |  |  |  |  |  |  |  |  |  |  |  |  |  |  |  |  |  |  |  |  |  |  |  |  |  |  |  |  |  |  |  |  |  |  |  |  |  |  |  |  |  |  |  |  |  |  |  |  |  |  |  |  |  |  |  |  |  |  |  |  |  |  |  |  |  |  |  |  |  |  |  |  |  |  |  |  |  |  |  |  |  |  |  |  |  |  |  |  |  |  |  |  |  |  |  |  |  |  |  |  |  |  |  |  |  |  |  |  |  |  |  |  |  |  |  |  |  |  |  |  |  |  |  |  |  |  |  |  |  |  |  |  |  |  |  |  |  |  |  |  |  |  |  |  |  |  |  |  |  |  |  |  |  |  |  |  |  |  |  |  |  |  |  |  |  |
|--|--|--|--|----|--|--|--|--|--|----|--|--|--|--|--|--|--|--|--|--|--|--|--|--|--|--|--|--|--|--|--|--|--|--|--|--|--|--|--|--|--|--|--|--|--|--|--|--|--|--|--|--|--|--|--|--|--|--|--|--|--|--|--|--|--|--|--|--|--|--|--|--|--|--|--|--|--|--|--|--|--|--|--|--|--|--|--|--|--|--|--|--|--|--|--|--|--|--|--|--|--|--|--|--|--|--|--|--|--|--|--|--|--|--|--|--|--|--|--|--|--|--|--|--|--|--|--|--|--|--|--|--|--|--|--|--|--|--|--|--|--|--|--|--|--|--|--|--|--|--|--|--|--|--|--|--|--|--|--|--|--|--|--|--|--|--|--|--|--|--|--|--|--|--|--|--|--|--|--|--|--|--|--|--|--|--|--|--|--|--|--|--|--|--|--|--|--|--|--|--|--|--|--|--|--|--|--|--|--|--|--|--|--|--|--|--|--|--|--|--|--|--|--|--|--|--|--|--|--|--|--|--|--|--|--|--|--|--|--|--|--|--|--|--|--|--|--|--|--|--|--|--|--|--|--|--|--|--|--|--|--|--|--|--|--|--|--|--|--|--|--|--|--|--|--|--|--|--|--|--|--|--|--|--|--|--|--|--|--|--|--|--|--|--|--|--|--|--|--|--|--|--|--|--|--|--|--|--|--|--|--|--|--|--|--|--|--|--|--|--|--|--|--|--|--|--|--|--|--|--|--|--|--|--|--|--|--|--|--|--|--|--|--|--|--|--|--|--|--|--|--|--|--|--|--|--|--|--|--|--|--|--|--|--|--|--|--|--|--|--|--|--|--|--|--|--|--|--|--|--|--|--|--|--|--|--|--|--|--|--|--|--|--|--|--|--|--|--|--|--|--|--|--|--|--|--|--|--|--|--|--|--|--|--|--|--|--|--|--|--|--|--|--|--|--|--|--|--|--|--|--|--|--|--|--|--|--|--|--|--|--|--|--|--|--|--|--|--|--|--|--|--|--|--|--|--|--|--|--|--|--|--|--|--|--|--|--|--|--|--|--|--|--|--|--|--|--|--|--|--|--|--|--|--|--|--|--|--|--|--|--|--|--|--|--|--|--|--|--|--|--|--|--|--|--|--|--|--|--|--|--|--|--|--|--|--|--|--|--|--|--|--|--|--|--|--|--|--|--|--|--|--|--|--|--|--|--|--|--|--|--|--|--|--|--|--|--|--|--|--|--|--|--|--|--|--|--|--|--|--|--|--|--|--|--|--|--|--|--|--|--|--|--|--|--|--|--|--|--|--|--|--|--|--|--|--|--|--|--|--|--|--|--|--|--|--|--|--|--|--|--|--|--|--|--|--|--|--|--|--|--|--|--|--|--|--|--|--|--|--|--|--|--|--|--|--|--|--|--|--|--|--|--|--|--|--|--|--|--|--|--|--|--|--|--|--|--|--|--|--|--|--|--|--|--|--|--|--|--|--|--|--|--|--|--|--|--|--|--|--|--|--|--|--|--|--|--|--|--|--|--|--|--|--|--|--|--|--|--|--|--|--|--|--|--|--|--|--|--|--|--|--|--|--|--|--|--|--|--|--|--|--|--|--|--|--|--|--|--|--|--|--|--|--|--|--|--|--|--|--|--|--|--|--|--|--|--|--|--|--|--|--|--|--|--|--|--|--|--|--|--|--|--|--|--|--|--|--|--|--|--|--|--|--|--|--|--|--|--|--|--|--|--|--|--|--|--|--|--|--|--|--|--|--|--|--|--|--|--|--|--|--|--|--|--|--|--|--|--|--|--|--|--|--|--|--|--|--|--|--|--|--|--|--|--|--|--|--|--|--|--|--|--|--|--|--|--|--|--|--|--|--|--|--|--|--|--|--|--|--|--|--|--|--|--|--|--|--|--|--|--|--|--|--|--|--|--|--|--|--|--|--|--|--|--|--|--|--|--|--|--|--|--|--|--|--|--|--|--|--|--|--|--|--|--|--|--|--|--|--|--|--|--|--|--|--|--|--|--|--|--|--|--|--|--|--|--|--|--|--|--|--|--|--|--|--|--|--|--|--|--|--|--|--|--|--|--|--|--|--|--|--|--|--|--|--|--|--|--|--|--|--|--|--|--|--|--|--|--|--|--|--|--|--|--|--|--|--|--|--|--|--|--|--|--|--|--|--|--|--|--|--|--|--|--|--|--|--|--|--|--|--|--|--|--|--|--|--|--|--|--|--|--|--|--|--|--|--|--|--|--|--|--|--|--|--|--|--|--|--|--|--|--|--|--|--|--|--|--|--|--|--|--|--|--|--|--|--|--|--|--|--|--|--|--|--|--|--|--|--|--|--|--|--|--|--|--|--|--|--|--|--|--|--|--|--|--|--|--|--|--|--|--|--|--|--|--|--|--|--|--|--|--|--|--|--|--|--|--|--|--|--|--|--|--|--|--|--|--|--|--|--|--|--|--|--|--|--|--|--|--|--|--|--|--|--|--|--|--|--|--|--|--|--|--|--|--|--|--|--|--|--|--|--|--|--|--|--|--|--|--|--|--|--|--|--|--|--|--|--|--|--|--|--|--|--|--|--|--|--|--|--|--|--|--|--|--|--|--|--|--|--|--|--|--|--|--|--|--|--|--|--|--|--|--|--|--|--|--|--|--|--|--|--|--|--|--|--|--|--|--|--|--|--|--|--|--|--|--|--|--|--|--|--|--|--|--|--|--|--|--|--|--|--|--|--|--|--|--|--|--|--|--|--|--|--|--|--|--|--|--|--|--|--|--|--|--|--|--|--|--|--|--|--|--|--|--|--|--|--|--|--|--|--|--|--|--|--|--|--|--|--|--|--|--|--|--|--|--|--|--|--|--|--|--|--|--|--|--|--|--|--|--|--|--|--|--|--|--|--|--|--|--|--|--|--|--|--|--|--|--|--|--|--|--|--|--|--|--|--|--|--|--|--|--|--|--|--|--|--|--|--|--|--|--|--|--|--|--|--|--|--|--|--|--|--|--|--|--|--|--|--|--|--|--|--|--|--|--|--|--|--|--|--|--|--|--|--|--|--|--|--|--|--|--|--|--|--|--|--|--|--|--|--|--|--|--|--|--|--|--|--|--|--|--|--|--|--|--|--|--|--|--|--|--|--|--|--|--|--|--|--|--|--|--|--|--|--|--|--|--|--|--|--|--|--|--|--|--|--|--|--|--|--|--|--|--|--|--|--|--|--|--|--|--|--|--|--|--|--|--|--|--|--|--|--|--|--|--|--|--|--|--|--|--|--|--|--|--|--|--|--|--|--|--|--|--|--|--|--|--|--|--|--|--|--|--|--|--|--|--|--|--|--|--|--|--|--|--|--|--|--|--|--|--|--|--|--|--|--|--|--|--|--|--|--|--|--|--|--|--|--|--|--|--|--|--|--|--|--|--|--|--|--|--|--|--|--|--|--|--|--|--|--|--|--|--|--|--|--|--|--|--|--|--|--|--|--|--|--|--|--|--|--|--|--|--|--|--|--|--|--|--|--|--|--|--|--|--|--|--|--|--|--|--|--|--|--|--|--|--|--|--|--|--|--|--|--|--|--|--|--|--|--|--|--|--|--|--|--|--|--|--|--|--|--|--|--|--|--|--|--|--|--|--|--|--|--|--|--|--|--|--|--|--|--|--|--|--|--|--|--|--|--|--|--|--|--|--|--|--|--|
|  |  |  |  | 20 |  |  |  |  |  | 40 |  |  |  |  |  |  |  |  |  |  |  |  |  |  |  |  |  |  |  |  |  |  |  |  |  |  |  |  |  |  |  |  |  |  |  |  |  |  |  |  |  |  |  |  |  |  |  |  |  |  |  |  |  |  |  |  |  |  |  |  |  |  |  |  |  |  |  |  |  |  |  |  |  |  |  |  |  |  |  |  |  |  |  |  |  |  |  |  |  |  |  |  |  |  |  |  |  |  |  |  |  |  |  |  |  |  |  |  |  |  |  |  |  |  |  |  |  |  |  |  |  |  |  |  |  |  |  |  |  |  |  |  |  |  |  |  |  |  |  |  |  |  |  |  |  |  |  |  |  |  |  |  |  |  |  |  |  |  |  |  |  |  |  |  |  |  |  |  |  |  |  |  |  |  |  |  |  |  |  |  |  |  |  |  |  |  |  |  |  |  |  |  |  |  |  |  |  |  |  |  |  |  |  |  |  |  |  |  |  |  |  |  |  |  |  |  |  |  |  |  |  |  |  |  |  |  |  |  |  |  |  |  |  |  |  |  |  |  |  |  |  |  |  |  |  |  |  |  |  |  |  |  |  |  |  |  |  |  |  |  |  |  |  |  |  |  |  |  |  |  |  |  |  |  |  |  |  |  |  |  |  |  |  |  |  |  |  |  |  |  |  |  |  |  |  |  |  |  |  |  |  |  |  |  |  |  |  |  |  |  |  |  |  |  |  |  |  |  |  |  |  |  |  |  |  |  |  |  |  |  |  |  |  |  |  |  |  |  |  |  |  |  |  |  |  |  |  |  |  |  |  |  |  |  |  |  |  |  |  |  |  |  |  |  |  |  |  |  |  |  |  |  |  |  |  |  |  |  |  |  |  |  |  |  |  |  |  |  |  |  |  |  |  |  |  |  |  |  |  |  |  |  |  |  |  |  |  |  |  |  |  |  |  |  |  |  |  |  |  |  |  |  |  |  |  |  |  |  |  |  |  |  |  |  |  |  |  |  |  |  |  |  |  |  |  |  |  |  |  |  |  |  |  |  |  |  |  |  |  |  |  |  |  |  |  |  |  |  |  |  |  |  |  |  |  |  |  |  |  |  |  |  |  |  |  |  |  |  |  |  |  |  |  |  |  |  |  |  |  |  |  |  |  |  |  |  |  |  |  |  |  |  |  |  |  |  |  |  |  |  |  |  |  |  |  |  |  |  |  |  |  |  |  |  |  |  |  |  |  |  |  |  |  |  |  |  |  |  |  |  |  |  |  |  |  |  |  |  |  |  |  |  |  |  |  |  |  |  |  |  |  |  |  |  |  |  |  |  |  |  |  |  |  |  |  |  |  |  |  |  |  |  |  |  |  |  |  |  |  |  |  |  |  |  |  |  |  |  |  |  |  |  |  |  |  |  |  |  |  |  |  |  |  |  |  |  |  |  |  |  |  |  |  |  |  |  |  |  |  |  |  |  |  |  |  |  |  |  |  |  |  |  |  |  |  |  |  |  |  |  |  |  |  |  |  |  |  |  |  |  |  |  |  |  |  |  |  |  |  |  |  |  |  |  |  |  |  |  |  |  |  |  |  |  |  |  |  |  |  |  |  |  |  |  |  |  |  |  |  |  |  |  |  |  |  |  |  |  |  |  |  |  |  |  |  |  |  |  |  |  |  |  |  |  |  |  |  |  |  |  |  |  |  |  |  |  |  |  |  |  |  |  |  |  |  |  |  |  |  |  |  |  |  |  |  |  |  |  |  |  |  |  |  |  |  |  |  |  |  |  |  |  |  |  |  |  |  |  |  |  |  |  |  |  |  |  |  |  |  |  |  |  |  |  |  |  |  |  |  |  |  |  |  |  |  |  |  |  |  |  |  |  |  |  |  |  |  |  |  |  |  |  |  |  |  |  |  |  |  |  |  |  |  |  |  |  |  |  |  |  |  |  |  |  |  |  |  |  |  |  |  |  |  |  |  |  |  |  |  |  |  |  |  |  |  |  |  |  |  |  |  |  |  |  |  |  |  |  |  |  |  |  |  |  |  |  |  |  |  |  |  |  |  |  |  |  |  |  |  |  |  |  |  |  |  |  |  |  |  |  |  |  |  |  |  |  |  |  |  |  |  |  |  |  |  |  |  |  |  |  |  |  |  |  |  |  |  |  |  |  |  |  |  |  |  |  |  |  |  |  |  |  |  |  |  |  |  |  |  |  |  |  |  |  |  |  |  |  |  |  |  |  |  |  |  |  |  |  |  |  |  |  |  |  |  |  |  |  |  |  |  |  |  |  |  |  |  |  |  |  |  |  |  |  |  |  |  |  |  |  |  |  |  |  |  |  |  |  |  |  |  |  |  |  |  |  |  |  |  |  |  |  |  |  |  |  |  |  |  |  |  |  |  |  |  |  |  |  |  |  |  |  |  |  |  |  |  |  |  |  |  |  |  |  |  |  |  |  |  |  |  |  |  |  |  |  |  |  |  |  |  |  |  |  |  |  |  |  |  |  |  |  |  |  |  |  |  |  |  |  |  |  |  |  |  |  |  |  |  |  |  |  |  |  |  |  |  |  |  |  |  |  |  |  |  |  |  |  |  |  |  |  |  |  |  |  |  |  |  |  |  |  |  |  |  |  |  |  |  |  |  |  |  |  |  |  |  |  |  |  |  |  |  |  |  |  |  |  |  |  |  |  |  |  |  |  |  |  |  |  |  |  |  |  |  |  |  |  |  |  |  |  |  |  |  |  |  |  |  |  |  |  |  |  |  |  |  |  |  |  |  |  |  |  |  |  |  |  |  |  |  |  |  |  |  |  |  |  |  |  |  |  |  |  |  |  |  |  |  |  |  |  |  |  |  |  |  |  |  |  |  |  |  |  |  |  |  |  |  |  |  |  |  |  |  |  |  |  |  |  |  |  |  |  |  |  |  |  |  |  |  |  |  |  |  |  |  |  |  |  |  |  |  |  |  |  |  |  |  |  |  |  |  |  |  |  |  |  |  |  |  |  |  |  |  |  |  |  |  |  |  |  |  |  |  |  |  |  |  |  |  |  |  |  |  |  |  |  |  |  |  |  |  |  |  |  |  |  |  |  |  |  |  |  |  |  |  |  |  |  |  |  |  |  |  |  |  |  |  |  |  |  |  |  |  |  |  |  |  |  |  |  |  |  |  |  |  |  |  |  |  |  |  |  |  |  |  |  |  |  |  |  |  |  |  |  |  |  |  |  |  |  |  |  |  |  |  |  |  |  |  |  |  |  |  |  |  |  |  |  |  |  |  |  |  |  |  |  |  |  |  |  |  |  |  |  |  |  |  |  |  |  |  |  |  |  |  |  |  |  |  |  |  |  |  |  |  |  |  |  |  |  |  |  |  |  |  |  |  |  |  |  |  |  |  |  |  |  |  |  |  |  |  |  |  |  |  |  |  |  |  |  |  |  |  |  |  |  |  |  |  |  |  |  |  |  |  |  |  |  |  |  |  |  |  |  |  |  |  |  |  |  |  |  |  |  |  |  |  |  |  |  |  |  |  |  |  |  |  |  |  |  |  |  |  |  |  |  |  |  |  |  |  |  |  |  |  |  |  |  |  |  |  |  |  |  |  |  |  |  |  |  |  |  |  |  |  |  |  |  |  |  |  |  |  |  |  |  |  |  |  |  |  |  |  |  |  |  |  |  |  |  |  |  |  |  |  |  |  |  |  |  |
|--|--|--|--|----|--|--|--|--|--|----|--|--|--|--|--|--|--|--|--|--|--|--|--|--|--|--|--|--|--|--|--|--|--|--|--|--|--|--|--|--|--|--|--|--|--|--|--|--|--|--|--|--|--|--|--|--|--|--|--|--|--|--|--|--|--|--|--|--|--|--|--|--|--|--|--|--|--|--|--|--|--|--|--|--|--|--|--|--|--|--|--|--|--|--|--|--|--|--|--|--|--|--|--|--|--|--|--|--|--|--|--|--|--|--|--|--|--|--|--|--|--|--|--|--|--|--|--|--|--|--|--|--|--|--|--|--|--|--|--|--|--|--|--|--|--|--|--|--|--|--|--|--|--|--|--|--|--|--|--|--|--|--|--|--|--|--|--|--|--|--|--|--|--|--|--|--|--|--|--|--|--|--|--|--|--|--|--|--|--|--|--|--|--|--|--|--|--|--|--|--|--|--|--|--|--|--|--|--|--|--|--|--|--|--|--|--|--|--|--|--|--|--|--|--|--|--|--|--|--|--|--|--|--|--|--|--|--|--|--|--|--|--|--|--|--|--|--|--|--|--|--|--|--|--|--|--|--|--|--|--|--|--|--|--|--|--|--|--|--|--|--|--|--|--|--|--|--|--|--|--|--|--|--|--|--|--|--|--|--|--|--|--|--|--|--|--|--|--|--|--|--|--|--|--|--|--|--|--|--|--|--|--|--|--|--|--|--|--|--|--|--|--|--|--|--|--|--|--|--|--|--|--|--|--|--|--|--|--|--|--|--|--|--|--|--|--|--|--|--|--|--|--|--|--|--|--|--|--|--|--|--|--|--|--|--|--|--|--|--|--|--|--|--|--|--|--|--|--|--|--|--|--|--|--|--|--|--|--|--|--|--|--|--|--|--|--|--|--|--|--|--|--|--|--|--|--|--|--|--|--|--|--|--|--|--|--|--|--|--|--|--|--|--|--|--|--|--|--|--|--|--|--|--|--|--|--|--|--|--|--|--|--|--|--|--|--|--|--|--|--|--|--|--|--|--|--|--|--|--|--|--|--|--|--|--|--|--|--|--|--|--|--|--|--|--|--|--|--|--|--|--|--|--|--|--|--|--|--|--|--|--|--|--|--|--|--|--|--|--|--|--|--|--|--|--|--|--|--|--|--|--|--|--|--|--|--|--|--|--|--|--|--|--|--|--|--|--|--|--|--|--|--|--|--|--|--|--|--|--|--|--|--|--|--|--|--|--|--|--|--|--|--|--|--|--|--|--|--|--|--|--|--|--|--|--|--|--|--|--|--|--|--|--|--|--|--|--|--|--|--|--|--|--|--|--|--|--|--|--|--|--|--|--|--|--|--|--|--|--|--|--|--|--|--|--|--|--|--|--|--|--|--|--|--|--|--|--|--|--|--|--|--|--|--|--|--|--|--|--|--|--|--|--|--|--|--|--|--|--|--|--|--|--|--|--|--|--|--|--|--|--|--|--|--|--|--|--|--|--|--|--|--|--|--|--|--|--|--|--|--|--|--|--|--|--|--|--|--|--|--|--|--|--|--|--|--|--|--|--|--|--|--|--|--|--|--|--|--|--|--|--|--|--|--|--|--|--|--|--|--|--|--|--|--|--|--|--|--|--|--|--|--|--|--|--|--|--|--|--|--|--|--|--|--|--|--|--|--|--|--|--|--|--|--|--|--|--|--|--|--|--|--|--|--|--|--|--|--|--|--|--|--|--|--|--|--|--|--|--|--|--|--|--|--|--|--|--|--|--|--|--|--|--|--|--|--|--|--|--|--|--|--|--|--|--|--|--|--|--|--|--|--|--|--|--|--|--|--|--|--|--|--|--|--|--|--|--|--|--|--|--|--|--|--|--|--|--|--|--|--|--|--|--|--|--|--|--|--|--|--|--|--|--|--|--|--|--|--|--|--|--|--|--|--|--|--|--|--|--|--|--|--|--|--|--|--|--|--|--|--|--|--|--|--|--|--|--|--|--|--|--|--|--|--|--|--|--|--|--|--|--|--|--|--|--|--|--|--|--|--|--|--|--|--|--|--|--|--|--|--|--|--|--|--|--|--|--|--|--|--|--|--|--|--|--|--|--|--|--|--|--|--|--|--|--|--|--|--|--|--|--|--|--|--|--|--|--|--|--|--|--|--|--|--|--|--|--|--|--|--|--|--|--|--|--|--|--|--|--|--|--|--|--|--|--|--|--|--|--|--|--|--|--|--|--|--|--|--|--|--|--|--|--|--|--|--|--|--|--|--|--|--|--|--|--|--|--|--|--|--|--|--|--|--|--|--|--|--|--|--|--|--|--|--|--|--|--|--|--|--|--|--|--|--|--|--|--|--|--|--|--|--|--|--|--|--|--|--|--|--|--|--|--|--|--|--|--|--|--|--|--|--|--|--|--|--|--|--|--|--|--|--|--|--|--|--|--|--|--|--|--|--|--|--|--|--|--|--|--|--|--|--|--|--|--|--|--|--|--|--|--|--|--|--|--|--|--|--|--|--|--|--|--|--|--|--|--|--|--|--|--|--|--|--|--|--|--|--|--|--|--|--|--|--|--|--|--|--|--|--|--|--|--|--|--|--|--|--|--|--|--|--|--|--|--|--|--|--|--|--|--|--|--|--|--|--|--|--|--|--|--|--|--|--|--|--|--|--|--|--|--|--|--|--|--|--|--|--|--|--|--|--|--|--|--|--|--|--|--|--|--|--|--|--|--|--|--|--|--|--|--|--|--|--|--|--|--|--|--|--|--|--|--|--|--|--|--|--|--|--|--|--|--|--|--|--|--|--|--|--|--|--|--|--|--|--|--|--|--|--|--|--|--|--|--|--|--|--|--|--|--|--|--|--|--|--|--|--|--|--|--|--|--|--|--|--|--|--|--|--|--|--|--|--|--|--|--|--|--|--|--|--|--|--|--|--|--|--|--|--|--|--|--|--|--|--|--|--|--|--|--|--|--|--|--|--|--|--|--|--|--|--|--|--|--|--|--|--|--|--|--|--|--|--|--|--|--|--|--|--|--|--|--|--|--|--|--|--|--|--|--|--|--|--|--|--|--|--|--|--|--|--|--|--|--|--|--|--|--|--|--|--|--|--|--|--|--|--|--|--|--|--|--|--|--|--|--|--|--|--|--|--|--|--|--|--|--|--|--|--|--|--|--|--|--|--|--|--|--|--|--|--|--|--|--|--|--|--|--|--|--|--|--|--|--|--|--|--|--|--|--|--|--|--|--|--|--|--|--|--|--|--|--|--|--|--|--|--|--|--|--|--|--|--|--|--|--|--|--|--|--|--|--|--|--|--|--|--|--|--|--|--|--|--|--|--|--|--|--|--|--|--|--|--|--|--|--|--|--|--|--|--|--|--|--|--|--|--|--|--|--|--|--|--|--|--|--|--|--|--|--|--|--|--|--|--|--|--|--|--|--|--|--|--|--|--|--|--|--|--|--|--|--|--|--|--|--|--|--|--|--|--|--|--|--|--|--|--|--|--|--|--|--|--|--|--|--|--|--|--|--|--|--|--|--|--|--|--|--|--|--|--|--|--|--|--|--|--|--|--|--|--|--|--|--|--|--|--|--|--|--|--|--|--|--|--|--|--|--|--|--|--|--|--|--|--|--|--|--|--|--|--|--|--|--|--|--|--|--|--|--|--|--|--|--|--|--|--|--|--|--|--|--|--|--|--|--|--|--|--|--|--|



|           |            | 180         |            | 200        |             | 220        |            | 240        |     |
|-----------|------------|-------------|------------|------------|-------------|------------|------------|------------|-----|
| SpGS1;1   | GGSGLDMRSK | ARTIAGPVDD  | PSKLPKWNVD | GSSTGQAPGE | DSEVILYPQA  | IFKDPFRFGN | NILVMDCYT  | PAGEPIPTNK | 106 |
| OsGS1;1   | GGSGMDLRSK | ARTLSGPVTD  | PSKLPKWNVD | GSSTGQAPGE | DSEVILYPQA  | IFKDPFRKGN | NILVMDCYT  | PAGEPIPTNK | 106 |
| SbGS1;1   | GGSGMDLRSK | ARTLSGPVTD  | PSKLPKWNVD | GSSTGQAPGE | DSEVILYPQA  | IFKDPFRFGN | NILVMDCYT  | PAGEPIPTNK | 106 |
| HvGS1;1   | GGSGMDLRSK | ARTLSGPVTD  | PSKLPKWNVD | GSSTGQAPGE | DSEVILYPQA  | IFKDPFRFGN | NILVMDCYT  | PAGEPIPTNK | 106 |
| BdGS1;1   | GGSGMDLRSK | ARTLSGPVTD  | PSKLPKWNVD | GSSTGQAPGE | DSEVILYPQA  | IFKDPFRFGN | NILVMDCYT  | PAGEPIPTNK | 106 |
| NnGLN1;1  | GGSGLDMRSK | ARTLSGPVSD  | PSKLPKWNVD | GSSTGQAPGE | DSEVILYPQA  | IFRDPFRFGN | NILVMCDTYT | PSGEPIPTNK | 106 |
| NnGLN1;2  | GGSGMDMRSK | AKTLSGPVSD  | PSKLPKWNVD | GSSTGQAPGE | DSEVILYPQA  | IFRDPFRFGN | NILVMCDTYT | PAGEPIPTNK | 106 |
| NnGLN1;3  | GGSGMDLRSK | ARTLSGPVTD  | PQKLPKWNVD | GSSTGQAPGE | DSEVILYPQA  | IFRDPFRFGN | NILVMCDYT  | PAGEPIPTNK | 106 |
| OsGS1;2   | GGSGIDLRSK | ARTVKGPITD  | VSQLPKWNVD | GSSTGQAPGE | DSEVILYPQA  | IFKDPFRFGD | NILVMDCYT  | PQGEPIPTNK | 106 |
| SbGS1;2   | GGSGIDLRSK | ARTVKGPITD  | PSQLPKWNVD | GSSTGQAPGE | DSEVILYPQA  | IFKDPFRFGD | NILVMDCYT  | PQGEPIPTNK | 106 |
| BdGS1;2   | GGSGIDLRSK | ARTVNGPITD  | ASQLPKWNVD | GSSTGQAPGE | DSEVILYPQA  | IFKDPFRFGD | NILVMDCYT  | PQGVPIPTNK | 106 |
| HvGS1;2   | GGSGIDIRSK | ARTVNGPITD  | ASQLPKWNVD | GSSTGQAPGE | DSEVILYPQA  | IFKDPFRFGD | NILVMDCYT  | PQGVPIPTNK | 106 |
| AtGLN1;1  | GGSGMDMRSK | ARTLPGPVTD  | PSQLPKWNVD | GSSTGQAPGE | DSEVILYPQA  | IFKDPFRFGN | NILVMCDAYT | PAGEPIPTNK | 106 |
| AtGLN1;2  | GGSGMDMRSK | ARTLPGPVTD  | PSKLPKWNVD | GSSTGQAPGQ | DSEVILYPQA  | IFKDPFRFGN | NILVMCDAYT | PAGEPIPTNK | 106 |
| AtGLN1;4  | GGSGLDMRSK | ARTLPGPVTD  | PSQLPKWNVD | GSSTGQAPGD | DSEVILYPQA  | IFKDPFRFGN | NILVMCDAYT | PAGEPIPTNK | 106 |
| AtGLN1;3  | GGSGMDIRSK | ARTLPGPVTD  | PSKLPKWNVD | GSSTGQAAGE | DSEVILYPQA  | IFKDPFRFGN | NILVMCDAYT | PAGDPIPTNK | 106 |
| SpGS1;2   | GGSGLDMRSK | ARTLSGPVDD  | PSKLPKWNVD | GSSTGQAPGE | DSEVILYPQA  | IFKDPFRFGN | NILVMCDAYT | PAGEPIPTNK | 106 |
| OsGS1;3   | GGTGMDVRSK | ARTLSGPVDD  | PSKLPKWNFD | GSSTGQATGD | DSEVILHPQA  | IFRDPFRKGN | NILVMCDYA  | PNGEPIPTNN | 108 |
| SbGS1;3   | GGSGMDVRSK | ARTLSGPVDD  | PSKLPKWNFD | GSSTGQAPGD | DSEVILCPRA  | IFRDPFRKGN | NILVMCDYE  | PNGKPIPSNK | 106 |
| HvGS1;3   | GGTGMDVRSK | ARTLPGPVDD  | PSKLPKWNFD | GSSTGQATGD | DSEVILHPQA  | IFRDPFRKGN | NILVMCDYA  | PTGEPIPSNK | 106 |
| BdGS1;3   | GGTGMDMRSK | ARTLPGPVDD  | PSKLPKWNFD | GSSTGQATGD | DSEVILCPQA  | IFRDPFRKGN | NILVMCDYA  | PTGEPIPSNK | 106 |
| SpGS1;3   | GGSGMDMRSK | ARTLPGSVSD  | PKELPKWNVD | GSSTGQAPGE | NSEVILHPQA  | IFKDPFRFGN | NILVMCDAYT | PAGEPIPTNK | 106 |
| AtGS1;5   | GGSGMDIRSK | ARTLPGPVSN  | PTKLPKWNVD | GSSTGQAPGE | DSEVILYPQA  | IFKDPFRFGN | NILVMCDAYR | PAGDPIPTNN | 106 |
| SpGS2     | GGSGIDVRSK | SRTISKAVEH  | PSLEPKWNVD | GSSTGQAPGE | DSEVILYPQA  | IFKDPFRFGN | NILVMCDYT  | PNGEPIPTNK | 160 |
| NnGS2     | GGSGIDLRSK | SRTISKPVED  | PSLEPKWNVD | GSSTGQAPGE | DSEVILYPQA  | IFKDPFRFGN | NILVICDSYT | PAGEPIPTNK | 166 |
| AtGS2     | GGSGIDLRSK | SRTIEKPVED  | PSLEPKWNVD | GSSTGQAPGE | DSEVILYPQA  | IFRDPFRFGN | NILVICDTWT | PAGEPIPTNK | 164 |
| OsGS2     | GGTGIDLRSK | SRTISKPVED  | PSLEPKWNVD | GSSTGQAPGE | DSEVILYPQA  | IFKDPFRFGN | NILVMCDTYT | PAGEPIPTNK | 162 |
| SbGS2     | GGSGIDIRSK | SRTISKPVED  | PSLEPKWNVD | GSSTGQAPGE | DSEVILYPQA  | IFKDPFRFGN | NILVICDTYT | PQGEPLPTNK | 231 |
| HvGS2     | GGSGIDLRSK | SRTISKPVED  | PSLEPKWNVD | GSSTGQAPGE | DSEVILYPQA  | IFKDPFRFGN | NILVICDTYT | PQGEPIPTNK | 168 |
| BdGS2     | GGSGIDIRSK | SRTISKPVAD  | PSLEPKWNVD | GSSTGQAPGE | DSEVILYPQA  | IFKDPFRFGN | NILLVCDTYT | PAGEPIPTNK | 164 |
| Consensus | GGSGMDLRSK | ARTLSGPVTD  | PSKLPKWNVD | GSSTGQAPGE | DSEVILYPQA  | IFKDPFRFGN | NILVMDCYT  | PAGEPIPTNK |     |
|           |            | 260         |            | 280        |             | 300        |            | 320        |     |
| SpGS1;1   | RFNAAKFVSN | PDVIAEVPWY  | GIEQEYTLQ  | KDINWPLGWP | VGGFPGPQGP  | YYCGTGADKA | FGRDIVDAH  | KACLYAGINI | 186 |
| OsGS1;1   | RHNAAKIFSS | PEVASEEPWY  | GIEQEYTLQ  | KDINWPLGWP | VGGFPGPQGP  | YYCGIGADKS | FGRDIVDSHY | KACLYAGINI | 186 |
| SbGS1;1   | RHNAAKIFSN | PEVAAEPPWY  | GIEQEYTLQ  | KDINWPLGWP | LGGFPGPQGP  | YYCGIGADKS | FGRDIVDAH  | KACLYAGINI | 186 |
| HvGS1;1   | RYNAAKIFSN | PDVAAEPPWY  | GIEQEYTLQ  | KDINWPLGWP | VGGFPGPQGP  | YYCGIGADKS | FGRDIVDSHY | KACLYAGINI | 186 |
| BdGS1;1   | RHNAAKIFSN | PAVAAEPPWY  | GIEQEYTLQ  | KDINWPLGWP | VGGFPGPQGP  | YYCSIGADKS | FGRDIVDSHY | KACLYAGINI | 186 |
| NnGLN1;1  | RCNAAKIFNH | PDVLAEEWLF  | GIEQEYTLQ  | KDVKWPVGWP | VGGFPGPQGP  | YYCGVGADKA | WGRDIVDSHY | KACLYAGINI | 186 |
| NnGLN1;2  | RCNAAKIFSH | PDVLAEEWLF  | GIEQEYTLQ  | KDVKWPVGWP | VGGFPGPQGP  | YYCGVGADKA | WGRDIVDSHY | KACLYAGINI | 186 |
| NnGLN1;3  | RYNAAKIFSH | PDVLAEEWLF  | GIEQEYTLQ  | KDVWPLGWP  | VGGFPGPQGP  | YYCGAGADKA | FGRDIVDSHY | KACLYAGINI | 186 |
| OsGS1;2   | RHSAAKIFSH | PDVVAEVPWY  | GIEQEYTLQ  | KDVNWPVGWP | VGGFPGPQGP  | YYCAAGAEKA | FGRDIVDAH  | KACLYAGINI | 186 |
| SbGS1;2   | RYNAAKFVSH | PDVAAEVPWY  | GIEQEYTLQ  | KDVNWPVGWP | VGGYPPGPQGP | YYCAAGADKA | FGRDIVDAH  | KACLYAGINI | 186 |
| BdGS1;2   | RHNAAKIFNN | PKVAAEVTWY  | GIEQEYTLQ  | KDVNWPVGWP | VGGYPPGPQGP | YYCAAGADKA | FGRDIVDAH  | KACLYAGINI | 186 |
| HvGS1;2   | RHNAAKIFNS | AKVAAEETWY  | GIEQEYTLQ  | KDVNWPVGWP | IGGYPPGPQGP | YYCAAGADKA | FGRDIVDAH  | KACLYAGINI | 186 |
| AtGLN1;1  | RHAAAKVFSS | PDVAAEVPWY  | GIEQEYTLQ  | KDVKWPVGWP | IGGYPPGPQGP | YYCGIGADKS | FGRDIVDSHY | KACLYAGINI | 186 |
| AtGLN1;2  | RHAAAKIFAN | PDVIAEVPWY  | GIEQEYTLQ  | KDVNWPVGWP | IGGYPPGPQGP | YYCSIGADKS | FGRDIVDAH  | KACLYAGINI | 186 |
| AtGLN1;4  | RHAAAKIFED | PSVVAEETWY  | GIEQEYTLQ  | KDINWPLGWP | VGGFPGPQGP  | YYCGVGADKA | FGRDIVDSHY | KACLYAGINV | 186 |
| AtGLN1;3  | RHNAAKIFSH | PDVAAEPPWY  | GIEQEYTLQ  | KDVNWPVGWP | VGGYPPGPQGP | YYCGVGADKA | IGRDIVDAH  | KACLYAGIGI | 186 |
| SpGS1;2   | RYKAAQIFSD | PAVVAEVPWY  | GLEQEYTLQ  | KDVKWPVGWP | LGGFPAPQGP  | YYCGTGVDKA | FGRDIVDAH  | KACLYAGINI | 186 |
| OsGS1;3   | RYNAAKIFSH | PDVKAEEPPWY | GIEQEYTLQ  | KHINWPLGWP | LGGYPPGPQGP | YYCAAGADKS | YGRDIVDAH  | KACLYAGINI | 188 |
| SbGS1;3   | RHGAATIFSH | PDVKAEEPPWY | GIEQEYTLQ  | KDINWPLGWP | LGGYPPGPQGP | YYCAAGADKS | YGREIVDAH  | KACLYAGIDI | 186 |
| HvGS1;3   | RYNAAKIFGH | PDVKEEPPWY  | GIEQEYTLQ  | KDINWPLGWP | LGGYPPGPQGP | YYCAAGAEKS | YGRDIVDAH  | KACLYAGINI | 186 |
| BdGS1;3   | RSSAANIFSH | PDVKAEEPPWY | GIEQEYTLQ  | KDINWPLGWP | LGGYPPGAQGP | YYCATGAES  | YGRDIVDAH  | KACLYAGVNI | 186 |
| SpGS1;3   | RFLAEKIFSH | PDVIAEPPWY  | GIEQEYTLQ  | RDVHWPVGWP | VGGFPRPQGP  | YYCGVGADKA | FGRDIVDSHY | KACLYAGINV | 186 |
| AtGS1;5   | RHKAVKIFDH | PNVKAEEPPWY | GIEQEYTLQ  | KDVKWPVGWP | LGGFPGPQGP  | YYCAVGADKA | FGRDIVDAH  | KACLYAGSLI | 186 |
| SpGS2     | RYRAAQIFSD | PKVVAEVPWF  | GIEQEYTLQ  | SNVWPLGWP  | IGGYPPGPQGP | YYCSAGADKS | FGRDIVDAH  | KACLYAGINI | 240 |
| NnGS2     | RYRAAQIFSD | PKVVQEVWY   | GIEQEYTLQ  | TNVKWPVGWP | IGAYPPGPQGP | YYCGVGADKS | FGRDIVDAH  | KACLYAGINI | 246 |
| AtGS2     | RAKAAEIFSN | KKVSGEVPWF  | GIEQEYTLQ  | QNVKWPVGWP | VGAFFPGPQGP | YYCGVGADKI | WGRDIVDAH  | KACLYAGINI | 244 |
| OsGS2     | RNRAAQVFS  | PKVVSQVPWF  | GIEQEYTLQ  | RDVWPLGWP  | VGGYPPGPQGP | YYCAVGSCKS | FGRDIVDAH  | KACLYAGINI | 242 |
| SbGS2     | RHRAAQIFSD | PKVVEQVPWF  | GIEQEYTLQ  | KDVNWPVGWP | VGGYPPGPQGP | YYCAVGADKS | FGRDIVDAH  | KACLYAGINI | 311 |
| HvGS2     | RHMAAQIFSD | PKVTSQVPWF  | GIEQEYTLQ  | RDVWPLGWP  | VGGYPPGPQGP | YYCAVGSCKS | FGRDIVDAH  | KACLYAGIEI | 248 |
| BdGS2     | RHRAAQIFSD | PKVASQVPWF  | GIEQEYTLQ  | RDVWPLGWP  | VGGYPPGPQGP | YYCAVGSCKS | FGRDIVDAH  | KACLYAGIEI | 244 |
| Consensus | RHNAAKIFSH | PDVAAEPPWY  | GIEQEYTLQ  | KDVNWPVGWP | VGGXPPGPQGP | YYCGVGADKS | FGRDIVDAH  | KACLYAGINI |     |



|           |             |            |               |             |             |             |            |             |     |
|-----------|-------------|------------|---------------|-------------|-------------|-------------|------------|-------------|-----|
|           |             |            | 340           |             | 360         |             | 380        |             | 400 |
| SpGS1;1   | SGINGEVMPG  | QWEFQVGPVV | GISAGDQVWV    | ARYILERITE  | IAGVVVSFDP  | KPIKGDWNGA  | GAHTNYSTQS | MRNDGGYEV   | 266 |
| OsGS1;1   | SGINGEVMPG  | QWEFQVGPVS | GISAGDQVWV    | ARYILERITE  | IAGVVVSFDP  | KPIPGDWNGA  | GAHTNYSTKS | MRNDGGYEV   | 266 |
| SbGS1;1   | SGINGEVMPG  | QWEFQVGPVS | GISAGDQVWV    | ARYILERITE  | IAGVVLTFDP  | KPIPGDWNGA  | GAHTNYSTKS | MRNEGGYEV   | 266 |
| HvGS1;1   | SGINGEVMPG  | QWEFQVGPTV | GISAGDQVWV    | ARYILERITE  | IAGVVVTFDP  | KPIPGDWNGA  | GAHTNYSTES | MRNDGGFKV   | 266 |
| BdGS1;1   | SGINGEVMPG  | QWEFQVGPVS | GISAGDQVWV    | ARYLLERITE  | IAGVVVSFDP  | KPIPGDWNGA  | GAHTNYSTES | MRNDGGFQV   | 266 |
| NnGLN1;1  | SGINGEVMPG  | QWEFQVGPVS | GISAGDELWI    | ARYILERITE  | IAGVVLTFDP  | KPIQGDWNGA  | GAHTNYSTKS | MRSEGGYEV   | 266 |
| NnGLN1;2  | SGINGEVMPG  | QWEFQVGPVS | GISAGDELWI    | ARYILERITE  | IAGVVLTFDP  | KPIQGDWNGA  | GAHTNFSTKS | TRNEGGYEV   | 266 |
| NnGLN1;3  | SGINGEVMPG  | QWEFQVGPVS | GISAGDELWI    | ARYILERITE  | IAGVVLTFDP  | KPIKGDWNGA  | GAHTNYSTKS | MRNDGGIDV   | 266 |
| OsGS1;2   | SGINGEVMPG  | QWEFQVGPVS | GI AADQVWV    | ARYILERVTE  | VAGVVLSDP   | KPIPGDWNGA  | GAHTNFSTKS | MREPGGYEV   | 266 |
| SbGS1;2   | SGINGEVMPG  | QWEFQVGPVS | GISAGDEI WV   | ARYILERITE  | IAGI VLSLDP | KPIQGDWNGA  | GAHTNYSTKS | MREAGGYEV   | 266 |
| BdGS1;2   | SGINGEVMPG  | QWEFQVGPVS | GI AASDQLWV   | ARYILERITE  | VAGVVLSDP   | KPIPGDWNGA  | GAHTNYSTKS | MREAGGFV    | 266 |
| HvGS1;2   | SGINGEVMPG  | QWEFQVGPVS | GI AASDQLWV   | ARYILERITE  | VAGVVLSDP   | KPIPGDWNGA  | GAHTNYSTKS | MRQAGGYEV   | 266 |
| AtGLN1;1  | SGINGEVMPG  | QWEFQVGPVS | GI SAAD EIWV  | ARYILERITE  | IAGVVVSFDP  | KPIPGDWNGA  | GAHCNYSTKS | MREEGGYE    | 266 |
| AtGLN1;2  | SGINGEVMPG  | QWEFQVGPVS | GI SAAD EIW   | ARYILERITE  | IAGVVVSFDP  | KPIPGDWNGA  | GAHTNYSTKS | MREEGGYE    | 266 |
| AtGLN1;4  | SGTNGEVMPG  | QWEFQVGPTV | GI AADQVWV    | ARYILERITE  | LAGVVLSDP   | KPIPGDWNGA  | GAHTNYSTKS | MREDGGYEV   | 266 |
| AtGLN1;3  | SGINGEVMPG  | QWEFQVGPVE | GISAGDQVWV    | ARYLLERITE  | ISGV IVSFDP | KPVPGDWNGA  | GAHCNYSTKT | MRNDGGLEV   | 266 |
| SpGS1;2   | SGINGEVMPG  | QWEFQVGPVS | GI AADDELWV   | ARYILERITE  | VAGVVLSDP   | KPIKGDWNGA  | GCHTNYSTKT | MREEGGFV    | 266 |
| OsGS1;3   | SGINAEVMPG  | QWEFQIGPVV | GV SAGDHVWV   | ARYILERITE  | IAGVVVSFDP  | KPIPGDWNGA  | GAHTNYSTKS | MRSDGGYEV   | 268 |
| SbGS1;3   | SGINAEVMPG  | QWEFQVGPVS | GV SAGDQLWV   | ARYILERITE  | IAGVVVSFDP  | KPIPGDWNGA  | GAHTNYSTKS | MRSDGGYEV   | 266 |
| HvGS1;3   | GGINAEVMPG  | QWEFQVGPVS | GISAGDELWA    | ARYILERITE  | IAGVVVSFDP  | KPIPGEWNGA  | GAHTNYSTKS | MRSEGGYEV   | 266 |
| BdGS1;3   | GGINAEVMPG  | QWEFQVGPVS | GISAGDELWV    | ARYILERITE  | IAGVVVSFDP  | KPVPGEWNGA  | GAHTNYSTKS | MRSEGGYEV   | 266 |
| SpGS1;3   | SGVNGEVMPG  | QWEFQVGPVS | GISAGDQIWA    | ARYILERITE  | IAGVLLSFDP  | KPIKGDWNGA  | GAHTNYSTNS | MRNNGGMD    | 266 |
| AtGS1;5   | GGANGEVMPG  | QWEFQISPTV | GI GAGDQLWV   | ARYILERITE  | ICGV IVSFDP | KPIQGDWNGA  | AAHTNFSTKS | MRKDGGDL    | 266 |
| SpGS2     | SGTNGEVMPG  | QWEYQVGPVS | GI DAGDH I WV | SRYILERITE  | QAGVVLSDP   | KPIEGDWNGA  | GCHTNYSTKT | MREDGGFE    | 320 |
| NnGS2     | SGTNGEVMPG  | QWEYQVGPVS | GI EAGDH IWC  | SRYILERITE  | QAGVVLTLDP  | KPIEGDWNGA  | GCHTNYSTKS | MREEGGFV    | 326 |
| AtGS2     | SGTNGEVMPG  | QWEFQVGPVS | GI DAGDHVWC   | ARYLLERITE  | QAGVVLTLDP  | KPIEGDWNGA  | GCHTNYSTKS | MREEGGFV    | 324 |
| OsGS2     | SGTNGEVMPG  | QWEYQVGPVS | GI EAGDH IWI  | SRYILERITE  | QAGVVLTLDP  | KPIQGDWNGA  | GCHTNYSTKS | MREDGGFE    | 322 |
| SbGS2     | SGTNGEVMPG  | QWEYQVGPVS | GI EAGDH IWI  | SRYILERITE  | QAGVVLTLDP  | KPIQGDWNGA  | GCHTNYSTKT | MREDGGFD    | 391 |
| HvGS2     | SGTNGEVMPG  | QWEYQVGPVS | GI DAGDH IWA  | SRYILERITE  | QAGVVLTLDP  | KPIQGDWNGA  | GCHTNYSTLS | MREDGGFDV   | 328 |
| BdGS2     | SGTNGEVMPG  | QWEYQVGPVS | GI DAGDH IWA  | SRYILERITE  | QAGVVLTLDP  | KPIQGDWNGA  | GCHTNYSTKA | MREDGGFEV   | 324 |
| Consensus | SGINGEVMPG  | QWEFQVGPVS | GISAGDQXWV    | ARYILERITE  | IAGVVLSDP   | KPIPGDWNGA  | GAHTNYSTKS | MREDGGYEV   |     |
|           |             | 420        |               | 440         |             | 460         |            | 480         |     |
| SpGS1;1   | KKAI EKLGLR | HKEHIAAYGE | GNERRLTGRH    | ETADINTFLW  | GVANRGASIR  | VGRETEQNGK  | GYFEDRRPAS | NMDPYVVTAM  | 346 |
| OsGS1;1   | KSAI EKLKLR | HKEHISAYGE | GNERRLTGRH    | ETADINTFSW  | GVANRGASVR  | VGRETEQNGK  | GYFEDRRPAS | NMDPYIVTSM  | 346 |
| SbGS1;1   | KAAI EKLKLR | HKEHIAAYGE | GNERRLTGRH    | ETADINTFSW  | GVANRGASVR  | VGRETEQNGK  | GYFEDRRPAS | NMDPYVVTSM  | 346 |
| HvGS1;1   | VDAVEKLKLR  | HKEHIAAYGE | GNERRLTGKH    | ETADINTFSW  | GVANRGASVR  | VGRETEQNGK  | GYFEDRRPAS | NMDPYVVTSM  | 346 |
| BdGS1;1   | VAAVEKLKLR  | HKEHIAAYGE | GNERRLTGKH    | ETADINTFSW  | GVANRGASVR  | VGRETEQNGK  | GYFEDRRPAS | NMDPYVVTAM  | 346 |
| NnGLN1;1  | KKAI EKLGLR | HKEHISAYGE | GNERRLTGRH    | ETADINTFVW  | GVANRGASIR  | VGRDTERAGK  | GYFEDRRPAS | NMDPYVVTSM  | 346 |
| NnGLN1;2  | KKAI EKLGLR | HKEHIAAYGE | GNERRLTGRH    | ETADINTFAW  | GVANRGASIR  | VGRDTERAGK  | GYFEDRRPAS | NMDPYVVTSM  | 346 |
| NnGLN1;3  | KKAI EKLGLR | HKEHISAYGE | GNERRLTGRH    | ETADINTFSW  | GVANRGASIR  | VGRDTEKAGK  | GYFEDRRPAS | NMDPYVVTSM  | 346 |
| OsGS1;2   | KKAI EKLGLR | HKEHIAAYGE | GNERRLTGRH    | ETADINTFKW  | GVANRGASIR  | VGRDTEKAGK  | GYFEDRRPAS | NMDPYVVTGM  | 346 |
| SbGS1;2   | KKAI EKLGLR | HTEHIAAYGE | GNERRLTGRH    | ETADINTFKW  | GVANRGASIR  | VGRDTEREGK  | GYFEDRRPAS | NMDPYVVTGM  | 346 |
| BdGS1;2   | KKAI EKLGLR | HTEHIAAYGE | GNERRLTGHH    | ETADINTFKW  | GVANRGASIR  | VGRDTEKD GK | GYFEDRRPAS | NMDPYVVTSM  | 346 |
| HvGS1;2   | KKAI EKLGLR | HMQHIAAYGE | GNERRLTGHH    | ETADINTFKW  | GVADRGASIR  | VGRDTEKD GK | GYFEDRRPAS | NMDPYVVTSM  | 346 |
| AtGLN1;1  | KKAI EKLGLR | HKEHIAAYGE | GNERRLTGHH    | ETADINTFLW  | GVANRGASIR  | VGRDTEKEGK  | GYFEDRRPAS | NMDPYIVTSM  | 346 |
| AtGLN1;2  | KKAI EKLGLR | HKEHISAYGE | GNERRLTGHH    | ETADINTFLW  | GVANRGASIR  | VGRDTEKEGK  | GYFEDRRPAS | NMDPYVVTSM  | 346 |
| AtGLN1;4  | KKAI EKLGLR | HKEHIAAYGE | GNERRLTGKH    | ETADINTFLW  | GVANRGASIR  | VGRDTEQAGK  | GYFEDRRPAS | NMDPYVTSM   | 346 |
| AtGLN1;3  | KKAI EKLGLR | HKEHIAAYGE | GNERRLTGKH    | ETADINTFSW  | GVANRGASVR  | VGRDTEKEGK  | GYFEDRRPAS | NMDPYVVTSM  | 346 |
| SpGS1;2   | KKAI EKLGLR | HKEHISAYGE | GNERRLTGHH    | ETADINTFKW  | GVANRGASIR  | VGRDTEKEGK  | GYFEDRRPAS | NMDPYVVTSM  | 346 |
| OsGS1;3   | KKAI EKLGLR | HREHIAAYGD | GNERRLTGRH    | ETADINNFVW  | GVANRGASVR  | VGRDTEKD GK | GYFEDRRPAS | NMDPYLV TAM | 348 |
| SbGS1;3   | KKAI EKLGLR | HREHIAAYGD | GNERRLTGRH    | ETADINTFIW  | GVANRGASVR  | VGRDTEKEGK  | GYFEDRRPAS | NMDPYVVTSL  | 346 |
| HvGS1;3   | KRAI EKLGLR | HTEHIAAYGE | GNERRLTGRH    | ETADINTFVW  | GVANRGASVR  | VGRDTEKEGR  | GYFEDRRPAS | NMDPYVVTSM  | 346 |
| BdGS1;3   | KKAI EKLGLR | HGEHIAAYGE | GNERRLTGRH    | ETADINTFVW  | GVANRGASVR  | VGRDTEKEGK  | GYFEDRRPGS | NMDPYVVTSK  | 346 |
| SpGS1;3   | RRAI EKLGLR | HMEHIAAYGD | GNERRLTGRH    | ETADINTFSW  | GIADRGASVR  | VGRETEMAGN  | GYFEDRRPAS | NMDPYVVTSM  | 346 |
| AtGS1;5   | KEAI EKLGLR | HKEHIAAYGE | GNERRLTGKH    | ETADINTFSW  | GVADRGASVR  | VGRDTEKEGK  | GYFEDRRPSS | NMDPYLV TAM | 346 |
| SpGS2     | KKAVGNLALR  | HKEHISAYGE | GNERRLTGKH    | ETADINTFSW  | GVANRGCSVR  | VGRETERQ GK | GYLEDRRPAS | NMDPYVVTSL  | 400 |
| NnGS2     | KKAI EKLGLR | HKEHISAYGE | GNERRLTGKH    | ETADINTFSW  | GVANRGCSIR  | VGRDTEKQ GK | GYLEDRRPAS | NMDPYVVTSL  | 406 |
| AtGS2     | KKAI EKLGLR | HKEHISAYGE | GNERRLTGKH    | ETASIDQFSW  | GVANRGCSIR  | VGRDTEAK GK | GYLEDRRPAS | NMDPYIVTSL  | 404 |
| OsGS2     | KKAI EKLGLR | HDLHISAYGE | GNERRLTGLH    | ETASIDNF SW | GVANRGCSIR  | VGRDTEAK GK | GYLEDRRPAS | NMDPYVVTAL  | 402 |
| SbGS2     | KRAI EKLGLR | HDLHISAYGE | GNERRLTGKH    | ETASIDTFSW  | GVANRGCSVR  | VGRDTEAK GK | GYLEDRRPAS | NMDPYIVTGL  | 471 |
| HvGS2     | KKAI EKLGLR | HDLHIAAYGE | GNERRLTGLH    | ETASIDFSW   | GVANRGCSIR  | VGRDTEAK GK | GYLEDRRPAS | NMDPYVTAL   | 408 |
| BdGS2     | KKAI EKLGLR | HDLHISAYGE | GNERRLTGLH    | ETASIDFSW   | GVANRGCSIR  | VGRDTEANGK  | GYLEDRRPAS | NMDPYVTAL   | 404 |
| Consensus | KKAI EKLGLR | HKEHIAAYGE | GNERRLTGRH    | ETADINTFSW  | GVANRGASIR  | VGRDTEKEGK  | GYFEDRRPAS | NMDPYVVTSM  |     |

|           |                     |                     |             |     |
|-----------|---------------------|---------------------|-------------|-----|
| 500       |                     |                     |             |     |
| SpGS1;1   | I A E T T I L W K P | -----               | -----       | 356 |
| OsGS1;1   | I A E T T I I W K P | -----               | -----       | 356 |
| SbGS1;1   | I A D T T I L W K P | -----               | -----       | 356 |
| HvGS1;1   | I A E T T I L W K P | -----               | -----       | 356 |
| BdGS1;1   | I A D T T I L W K P | -----               | -----       | 356 |
| NnGLN1;1  | I A E T T I L W K P | -----               | -----       | 356 |
| NnGLN1;2  | I A E T T I L W K P | -----               | -----       | 356 |
| NnGLN1;3  | I A E T T I L W N P | -----               | -----       | 356 |
| OsGS1;2   | I A E T T L L W K Q | N-----              | -----       | 357 |
| SbGS1;2   | I A E T T I L W N G | N-----              | -----       | 357 |
| BdGS1;2   | I A E T T L L L - - | -----               | -----       | 354 |
| HvGS1;2   | I A E T T L L L - - | -----               | -----       | 354 |
| AtGLN1;1  | I A E T T I L W N P | -----               | -----       | 356 |
| AtGLN1;2  | I A E T T L L W N P | -----               | -----       | 356 |
| AtGLN1;4  | I A E S T I L W K P | -----               | -----       | 356 |
| AtGLN1;3  | I A E T T I L G - - | -----               | -----       | 354 |
| SpGS1;2   | I A E T T I L W K P | T-----              | -----       | 357 |
| OsGS1;3   | I A E T T I L W E P | S H G H G H G Q S N | G K-----    | 370 |
| SbGS1;3   | I A E T T I L W E P | S H S N G K G A A A | P-----      | 367 |
| HvGS1;3   | I A E T T I L W K A | G L S N G K - - - - | -----       | 362 |
| BdGS1;3   | I A E T T I L W E P | N L S N G E - - - - | -----       | 362 |
| SpGS1;3   | I A E T T I L W K P | -----               | -----       | 356 |
| AtGS1;5   | I A E T T I L - - - | -----               | -----       | 353 |
| SpGS2     | L A E T T I L W E P | T V E S - - A A A Q | K V Q L E V | 424 |
| NnGS2     | L A E T T I L W E P | T L E A E A L A A Q | K L S L K V | 432 |
| AtGS2     | L A E T T L L W E P | T L E A E A L A A Q | K L S L N V | 430 |
| OsGS2     | L A E T T I L W E P | T L E A E V L A A K | K L A L K V | 428 |
| SbGS2     | L A E T T I L W Q P | T L E A E V L A A K | K L A L K V | 497 |
| HvGS2     | L A E T T I L W E P | T L E A E A L A A K | K L A L K V | 434 |
| BdGS2     | L A E T T L L W E P | T L E A E V L A A K | K L A L K V | 430 |
| Consensus | I A E T T I L W K P | -----               | -----       |     |

**B**

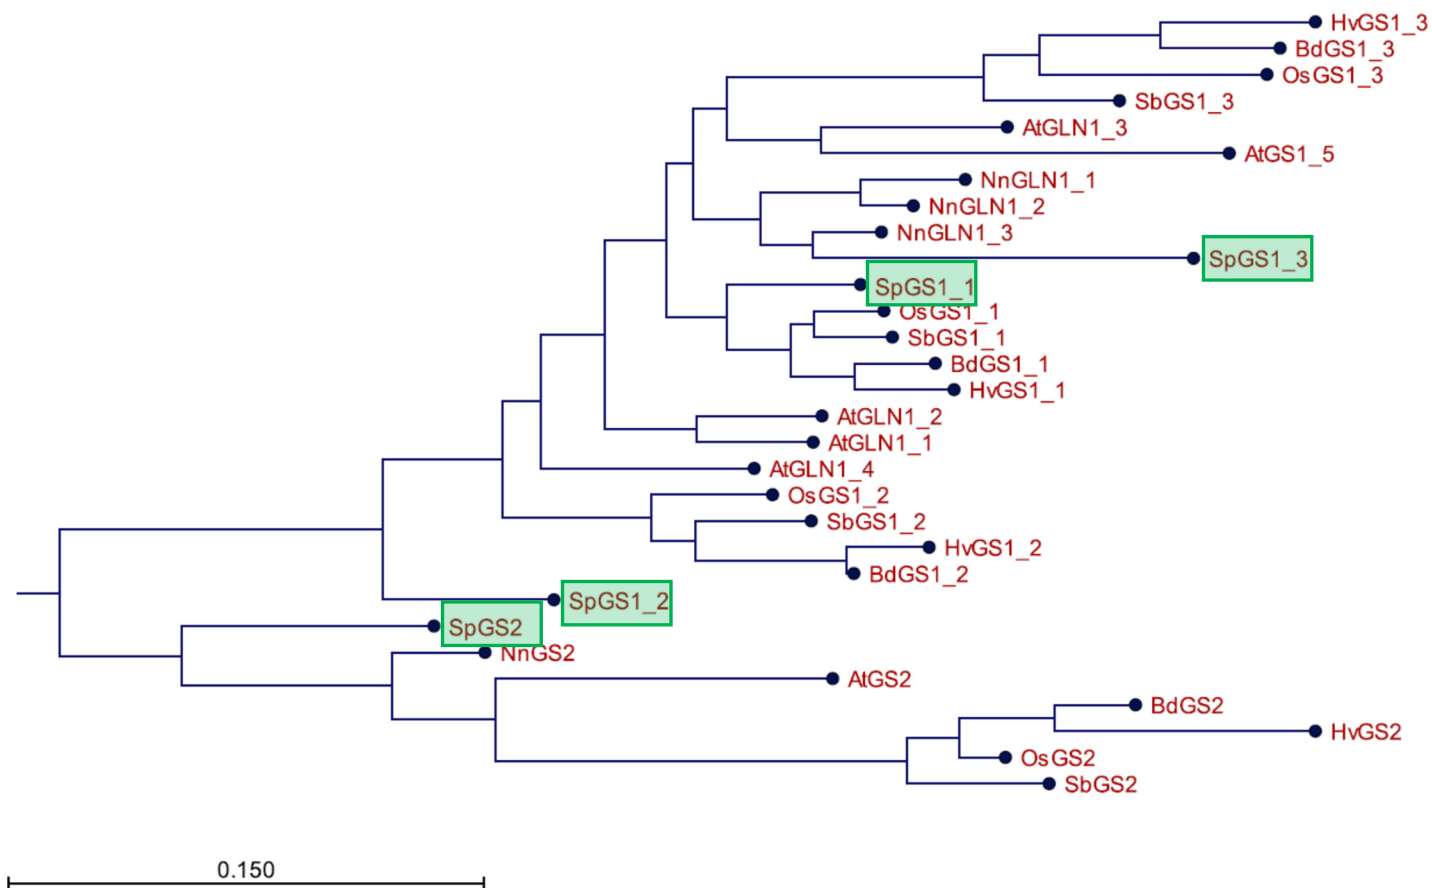

**Figure S9.** Sequence alignment of GS proteins from *S. polyrhiza* with other representative species (A) and the resulted phylogenetic tree (B). AtGln1;1 – *A. thaliana*, NP\_198576.1, AtGln1;2 – *A. thaliana*, NP\_176794.1, AtGln1;3 – *A. thaliana*, NP\_188409.1; AtGln1;4 – *A. thaliana*, NP\_001331815.1; AtGln1;5 – *A. thaliana*, NP\_175280.1; AtGS2 – *A. thaliana*, NP\_001031969.1; BdGS1;1 – *B. distachyon*, XP\_010236151.1, BdGS1;2 – *B. distachyon*, XP\_003558466.1, BdGS1;3 – *B. distachyon*, XP\_003560727.2, BdGS2 – *B. distachyon*, XP\_003580719.1, HvGS1;1 – *H. vulgare*, AFX60875.1; HvGS1;2 – *H. vulgare*, AFX60876.1, HvGS1;3 – *H. vulgare*, AFX60877.1, HvGS2 – *H. vulgare*, P13564.2, NnGS1;1 – *N. nucifera*, XP\_010271383.1, NnGS1;2 – *N. nucifera*, XP\_010271347.1; NnGS1;3 – *N. nucifera*, XP\_010250142.1, NnGS2 – *N. nucifera*, XP\_010255852.1, OsGS1;1 – *O. sativa*, XP\_015626102.1, OsGS1;2 – *O. sativa*, XP\_015631679.1, OsGS1;3 – *O. sativa*, XP\_015628694.1, OsGS2 – *O. sativa*, XP\_015635322.1, SbGS1;1 – *S. bicolor*, XP\_021313946.1, SbGS1;2 – *S. bicolor*, XP\_002465624.1, SbGS1;3 – *S. bicolor*, XP\_021306978.1,

SbGS2 - *S. bicolor*, XP\_021319069.1, SpGS1;1 - *S. polyrhiza* (sequence translated from Acc. ID MZ605906) , SpGS1;2 - *S. polyrhiza* (sequence translated from Acc. ID MZ605907); SpGS1;3 - *S. polyrhiza* (sequence translated from Acc. ID MZ605908), SpGS2 - *S. polyrhiza* (sequence translated from Acc. MZ605909)

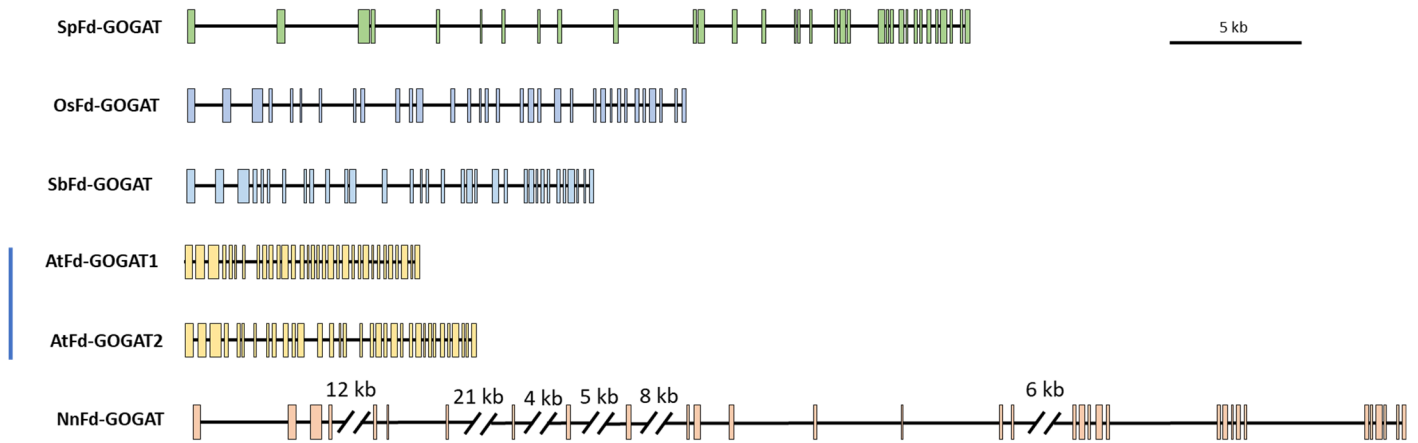

**Figure S10.** Diagrammatic representation of the structure of *Fd-GOGAT* genes.

*At Fd-GOGAT1* - *A. thaliana*, At5g04140, *AtFd-GOGAT2* - *A. thaliana*, At2g41220, *NnFd-GOGAT* - *N. nucifera*, LOC104611350, *OsFd-GOGAT* - *O. sativa*, LOC4344164, *SbFd-GOGAT* - *S. bicolor*, LOC8073135, *SpFd-GOGAT* - *S. polyrhiza* CP019094, the 1<sup>st</sup> chromosome, position from 4454784 to 4484474. Coding sequences are colored boxes. Introns are black lines. The bar is 5 kb.



A

|             |             |            |             |            |             |             |             |             |     |
|-------------|-------------|------------|-------------|------------|-------------|-------------|-------------|-------------|-----|
| SpFd-GOGAT  | MAQSAAA--A  | AAVSAAPRAL | LPSPTANSDS  | -----A     | FFSRNRSLLL  | RQ-----RS   | IVVHRRLL-CG | A---GRG-SR  | 58  |
| OsFd-GOGAT  | MATLPRAAAA  | AAPSPA--AL | LPLPRAAP--  | LLAGR--AA  | ARSAARRLRA  | R---GTRAPP  | LAAARRGW--  | -----GGV-S- | 63  |
| BdFd-GOGAT  | -----MAAT   | LPRVAPPSL  | LPLPRAAP--  | -----LLLA  | GRAAARRLRA  | R---GARAPA  | LAAARRSWAV  | -----S-     | 54  |
| SbFd-GOGAT  | MATLPRAAP-  | --PTPAA--L | LPLPRAAPPL  | LLAGR--AA  | AARRSR-LRA  | R---G---P   | SAAARRSWVV  | ASSSSSS-S-  | 62  |
| AtFd-GOGAT1 | -----MAM    | QSLSPVPKLL | STTPSS--    | -----      | VLSSDKNFFF  | VDFVGLYCKS  | KRTRRRLRGD  | SSSSSR-S-   | 58  |
| AtFd-GOGAT2 | -----MA     | LQSPGATGAS | SSVSRLLSA   | -----      | KLSSSTKTIFS | VDFVRSYCIS  | KGTKR--N    | ELSGFRGYSP  | 59  |
| NnFdGOGAT   | -----MAL    | QSVPMPLQL  | YSNGFSSTTS  | LSATK--SS  | IFDANRGLLF  | ADFI GLCCKS | KRTRQRIGIG  | AVRRGRG-S-  | 68  |
| Consensus   | -----AAAA   | XXPSPAP-XL | LPLPRAAP-S  | L-A-R--XA  | AXSAXRRLRA  | RD--GLXCXS  | KAXARRXW-X  | A-S-GRG-S-  |     |
| SpFd-GOGAT  | LLPSMPRSVR  | VGAHQREGTC | SVGNSKQTVS  | S-----     | -----RARRS  | K-----      | -VADLNDILS  | ERGACGVGF I | 114 |
| OsFd-GOGAT  | -----PRAVL  | DLPRRREAA- | --EKPAQKA-  | -----      | -----       | -----       | --ADLNEILS  | ERGACGVGF V | 102 |
| BdFd-GOGAT  | -----TRAVL  | DVPRHRAPP  | A-QKPQVEA-  | -----      | -----       | -----       | --ADLNDILA  | ERGACGVGF V | 95  |
| SbFd-GOGAT  | -----SRAVL  | GGVARREAPP | APQKPTQQA-  | -----      | -----       | -----       | --ADLNHILS  | ERGACGVGF V | 104 |
| AtFd-GOGAT1 | SLSRLS-SVR  | AVIDLERVHG | VSEKDLSSPS  | ALRPQVRFFT | DINFTNTQRA  | KFHPWLWGSFK | QVANLEDI LS | ERGACGVGF I | 137 |
| AtFd-GOGAT2 | LLKSSLRSPF  | SVKAILNSDR | AAGDASSSPS  | DLKP--     | -----       | -----       | QVAYLEDI LS | ERGACGVGF I | 113 |
| NnFdGOGAT   | -LGRSWSSVK  | AVLDVNRVDF | A-----SKES  | D-----     | -----TVRRA  | E-----N     | EVANLNDI LS | ERGACGVGF I | 120 |
| Consensus   | -L--XRSVL   | XVPXRREXP  | A-XKPQXAS   | -----      | -----       | -----       | -VADLNDILS  | ERGACGVGF I |     |
| SpFd-GOGAT  | ANLKNEASHK  | IVEDALVALG | CMEHRGGCGA  | DNDSDGAGL  | MTSPVWDLYN  | NWADKQGLPF  | LDTRYKTGVM  | VFLPQSDAM   | 194 |
| OsFd-GOGAT  | ANLKNEPSFN  | IVRDALVALG | CMEHRGGCGA  | DNDSDGSGSL | MSGIPWDLFN  | DWANKQGLAP  | LDRTNTGVM   | VFLPQDENSM  | 182 |
| BdFd-GOGAT  | ANLKNEPSFN  | IVRDALTALG | CMEHRGGCGA  | DNDSDGAGL  | MSGIPWDLFN  | DWASKQGLPP  | FERTNTGVM   | VFLPQNEESM  | 175 |
| SbFd-GOGAT  | ANLKNVPSFN  | IVRDALMALG | CMEHRGGCGA  | DNDSDGAGL  | MSAIPWDLFD  | DWANKQGLAP  | FDRRTNTGVM  | VFLPQDEKSM  | 184 |
| AtFd-GOGAT1 | ANLDNIPSHG  | VVKDALIALG | CMEHRGGCGA  | DNDSDGSGSL | MSSIPWDFFN  | VWAKEQSLAP  | FDKLHTGVM   | IFLPQDDTFM  | 217 |
| AtFd-GOGAT2 | ANLENKATHK  | IVNDALIALG | CMEHRGGCGS  | DNTSDGSGSL | MTSIPWDLFN  | EWAEKQGIAS  | FDRTHTGVM   | LFLPRDDNIR  | 193 |
| NnFdGOGAT   | ANLENNASHE  | IKDALTALG  | CMEHRGGCGA  | DNDSDGSGSL | MTSIPWDLFN  | NWANKQGIAS  | LDKLHTGVM   | VFLPKDDDSM  | 200 |
| Consensus   | ANLKNEPSHN  | IVRDALXALG | CMEHRGGCGA  | DNDSDGSGSL | MSSIPWDLFN  | DWANKQGLAP  | FDRTXTGVM   | VFLPQDDXSM  |     |
| SpFd-GOGAT  | EEAKKIVINT  | CLKEGLEIVG | WRPVPVNESV  | VGYAKETLP  | NIQQLFVKVY  | KEDNVDDLER  | ELYICRKLIE  | RAVQSEKWSN  | 274 |
| OsFd-GOGAT  | EEAKAVYAKV  | FTDEGLEVLG | WRTPVPNVSF  | VGRYAKETMP | NIQQIFVKVA  | KEDNADDIER  | ELYICRKLIE  | RATKSASWAD  | 262 |
| BdFd-GOGAT  | EEAKAAVAKV  | FTDEGLEVLG | WRPVPFNLSV  | VGRFAKETMP | NIQQIFVKVA  | KEDDADDIER  | ELYICRKLIE  | RAAKSASWAD  | 255 |
| SbFd-GOGAT  | EEAKAATEKV  | FTDEGLEVLG | WRPVPFNVSF  | VGRNAKETMP | NIQQIFVKVA  | KEDNADDIER  | ELYISRKLIE  | RATKSFSWAD  | 264 |
| AtFd-GOGAT1 | QEAKQVNIENI | FEKEGLQVLG | WRPVPVNPVI  | VGKNARETMP | NIQQVFVKIA  | KEDSTDDIER  | ELYICRKLIE  | RAVATESWGT  | 297 |
| AtFd-GOGAT2 | KEAKKVITSI  | FEKEGLEVLG | WRDVPVEASI  | VGHNAKQTMP | NTEQVFVRIV  | KDDKVDDVER  | ELYICRKLIE  | RAVASESWAS  | 273 |
| NnFdGOGAT   | KEAKSVIENT  | FKQEGLDVLG | WRPVPINVAV  | VGYAKETMP  | NIQQVFVKIS  | NEENIDDIER  | ELYICRKLIE  | RVSKLEKWGD  | 280 |
| Consensus   | EEAKAVIEXV  | FXXEGLEVLG | WRPVPXNVSV  | VGRXAKETMP | NIQQXFVKVA  | KEDNADDIER  | ELYICRKLIE  | RAVKSESAD   |     |
| SpFd-GOGAT  | DLYFCSFSNQ  | TVVYKGMRLS | EVLGQFYLDL  | QSDLYKSPFA | IYHRRYSTNT  | SPRWPLAQPM  | RLLGHNGEIN  | TIQGNLNMWQ  | 354 |
| OsFd-GOGAT  | ELYFCSLSSR  | TIVYKGMRLS | EILGQFYLDL  | QNELYKSPFA | IYHRRYSTNT  | SPRWPLAQPM  | RLLGHNGEIN  | TIQGNLNMWR  | 342 |
| BdFd-GOGAT  | ELYFCSLSSR  | TIIYKGMRLS | EVLGQFYLDL  | QNELYKSPFA | IYHRRYSTNT  | SPRWPLAQPM  | RLLGHNGEIN  | TIQGNLNMWR  | 335 |
| SbFd-GOGAT  | ELYFCSLSNR  | TIVYKGMRLS | EVLGQFYLDL  | QNELYKSPFA | IYHRRYSTNT  | SPRWPLAQPM  | RLLGHNGEIN  | TIQGNLNMWR  | 344 |
| AtFd-GOGAT1 | ELYFCSLSNQ  | TIVYKGMRLS | EALGLFYLDL  | QNELYKSPFA | IYHRRYSTNT  | SPRWPLAQPM  | RFLGHNGEIN  | TIQGNLNMWQ  | 377 |
| AtFd-GOGAT2 | ELYFSSLSNQ  | TIVYKGMRLS | EVLGLFYDPDL | QNELYKSPFA | IYHRRYSTNT  | SPRWHLAQPM  | RFLGHNGEIN  | TIQGNLNMWT  | 353 |
| NnFdGOGAT   | ELYFCSLSNQ  | TIVYKGMRLS | EVLGQFYSDL  | QSDLYKSPFA | IYHRRYSTNT  | SPRWPLAQPM  | RLLGHNGEIN  | TIQGNLNMWQ  | 360 |
| Consensus   | ELYFCSLSNQ  | TIVYKGMRLS | EVLGQFYLDL  | QNELYKSPFA | IYHRRYSTNT  | SPRWPLAQPM  | RLLGHNGEIN  | TIQGNLNMWQ  |     |
| SpFd-GOGAT  | SRETTIKSPV  | WRGRENEIRP | YGNPKGSDSA  | NLDSAAELL  | RSGRSPAEL   | MILVPEAYKK  | HPTLSIKYPE  | VIDFYDYKYG  | 434 |
| OsFd-GOGAT  | SREATLQSPV  | WRGREHEIRP | FGDPKASDSA  | NLDSTAELL  | RSGRSPAEL   | MILVPEAYKN  | HPTLSIKYPE  | VIDFYDYKYG  | 422 |
| BdFd-GOGAT  | SREATIQSPV  | WRGRENEIRP | FGDPKASDSA  | NLDNAELL   | RSGRSPAEL   | MMLVPEAYKN  | HPTLSIKYPE  | VIDFYDYKYG  | 415 |
| SbFd-GOGAT  | SRETTLQSPV  | WRGREHEICP | FGDPKASDSA  | NLDSTAELL  | RSGRSPAEL   | MILVPEAYKN  | HPTLSIKYPE  | VIDFYDYKYG  | 424 |
| AtFd-GOGAT1 | SREASLKAAV  | WNGRENEIRP | FGNPRGSDSA  | NLDSAAELMI | RSGRTPAEL   | MILVPEAYKN  | HPTLSVKYPE  | VDFDYDYKYG  | 457 |
| AtFd-GOGAT2 | SREASLRSPV  | WHGRENDIRP | ISNPKASDSA  | NLDSAAELL  | RSGRTPAEL   | MILVPEAYKN  | HPTLMIKYPE  | AVDFDYDYKYG | 433 |
| NnFdGOGAT   | SRETSLKSPV  | WRGREDEICP | YGNPKASDSA  | NLDSAAELL  | RSGRSPAEL   | MILVPEAYKN  | HPTLMIKYPE  | VDFDYDYKYG  | 440 |
| Consensus   | SREATLXSPV  | WRGRENEIRP | FGNPKASDSA  | NLDSAAELL  | RSGRSPAEL   | MILVPEAYKN  | HPTLSIKYPE  | VIDFYDYKYG  |     |
| SpFd-GOGAT  | QMEAWDGPAL  | LLFSDGKTVG | ACLDNRGLRP  | ARYWRTVDV  | VYVASEVGV   | PMDESKITMK  | GRLGPGMMIT  | VDLQNGQVYE  | 514 |
| OsFd-GOGAT  | QMEAWDGPAL  | LLFSDGRTVG | ACLDNRGLRP  | ARYWRTSDV  | VYVASEVGV   | PMDESKVVMK  | GRLGPGMMIT  | VDLQTGQVLE  | 502 |
| BdFd-GOGAT  | QMEAWDGPAL  | LLFSDGRTVG | ACLDNRGLRP  | ARYWRTSDG  | VYVASEVGV   | PMDESKVVMK  | GRLGPGMMIT  | VDLQTGQVLE  | 495 |
| SbFd-GOGAT  | QMEAWDGPAL  | LLFSDGRTVG | ATLDNRGLRP  | ARYWRTSDV  | VYVASEVGV   | PMDESKVVMK  | GRLGPGMMIT  | VDLQTGQVLE  | 504 |
| AtFd-GOGAT1 | QMEAWDGPAL  | LLFSDGKTVG | ACLDNRGLRP  | ARYWRTSDNF | VYVASEVGV   | PVDEAKVTMK  | GRLGPGMMIA  | VDLVNGQVYE  | 537 |
| AtFd-GOGAT2 | QMEPWDGPAL  | VLFSDGKTVG | ACLDNRGLRP  | ARYWRTSDNV | VYVASEVGV   | PMDESKVTMK  | GRLGPGMMIS  | VDELNGQVYE  | 513 |
| NnFdGOGAT   | QMEAWDGPAL  | LLFSDGKTVG | ACLDNRGLRP  | ARYWRTVDNV | VYVASEVGV   | PMDESRVTMK  | GRLGPGMMIT  | ADLLTGQVYE  | 520 |
| Consensus   | QMEAWDGPAL  | LLFSDGKTVG | ACLDNRGLRP  | ARYWRTSDXF | VYVASEVGVX  | PMDESKVTMK  | GRLGPGMMIT  | VDLQTGQVYE  |     |
| SpFd-GOGAT  | NTDVKKKVAS  | AHPYQWLNE  | NMRSMKPVNF  | LSSPVMDEL  | VLRHQQAQFY  | SSDEVQMVE   | TMASQGKEPT  | FCMGDDIPLA  | 594 |
| OsFd-GOGAT  | NTEVKKKVAS  | ANPYGSWLQ  | STRSIKPVNF  | QSSVAMDNET | VLRHQQAQFY  | SSDEVQMVE   | TMASQGKEPT  | FCMGDDIPLA  | 582 |
| BdFd-GOGAT  | NTEVKKKVAS  | AKPYGTWLQ  | STRSIKPVNF  | QSSPVMDET  | VLRHQQAQFY  | SSDEVQMVE   | TMASQGKEPT  | FCMGDDIPLA  | 575 |
| SbFd-GOGAT  | NTEVKKTVAL  | ASPYGTWLQ  | RTRSIKPVNF  | LSTTIMDNET | VLRHQQAQFY  | SSDEVQMVE   | SMASQGKEPT  | FCMGDDIPLA  | 584 |
| AtFd-GOGAT1 | NTEVKKRIS   | FNYPGKWIKE | NSRFLKPVNF  | KSSTVMNEE  | ILRSQQAQFY  | SSDEVQMVE   | SMASQGKEPT  | FCMGDDIPLA  | 617 |
| AtFd-GOGAT2 | NTEVKKRVAS  | YNYPGKVVSE | NLRNLKPSNY  | LSSAILETDE | TLRRQQAQFY  | SSDEVQMVE   | SMAAQGKEPT  | FCMGDDTPVA  | 593 |
| NnFdGOGAT   | NTDVKKRVAL  | SNYPGKWLSE | NMRTLKPVNF  | LSASVMDKEI | ILRHQQAQFY  | SSDEVQMVE   | TMAAQGKEPT  | FCMGDDIPLA  | 600 |
| Consensus   | NTEVKKRVAS  | ANPYGKWLQ  | NTRSXKPVNF  | LSSXVMDNET | VLRHQQAQFY  | SSDEVQMVE   | TMASQGKEPT  | FCMGDDIPLA  |     |
| SpFd-GOGAT  | XLSQXPHMIY  | DYFKQRFQAV | TNPAIDPLRE  | GLVMSLEVN  | GKRGNILEVG  | PQNAQVILS   | SPVLNEGELE  | TLMKDTALTP  | 674 |
| OsFd-GOGAT  | VLSQKPHMLF  | DYFKQRFQAV | TNPAIDPLRE  | GLVMSLEVN  | GKRGNILEVG  | PENADQVTL   | SPVLNEGELE  | SLLNDSKLKP  | 662 |
| BdFd-GOGAT  | VLSQKPHMLF  | DYFKQRFQAV | TNPAIDPLRE  | GLVMSLEVN  | GKRGNILEVG  | PENADQVALS  | SPVLNEGELE  | SLLDKTKLP   | 655 |
| SbFd-GOGAT  | VLSQRPHELLY | DYFKQRFQAV | TNPAIDPLRE  | GLVMSLEVN  | GKRGNILEVG  | PENADLVALS  | SPVLNEGELE  | TLLKDKPKLP  | 664 |
| AtFd-GOGAT1 | GLSQRPHELLY | DYFKQRFQAV | TNPAIDPLRE  | GLVMSLEVN  | GKRGNILEVG  | PENASQVILS  | NPVLNEGALE  | ELMKDQYLKP  | 697 |
| AtFd-GOGAT2 | VLSQKPHMLY  | DYFKQRFQAV | TNPAIDPLRE  | GLVMSLEVN  | GKRGNILEVG  | PQNVSQVLS   | GPVLNERELE  | GLLGDPLLS   | 673 |
| NnFdGOGAT   | ALSQKPHMLF  | DYFKQRFQAV | TNPAIDPLRE  | GLVMSLEVN  | GKRGNILEVG  | PENASQVILS  | SPVLNEGELE  | LLMEDPYLKP  | 680 |
| Consensus   | VLSQKPHMLY  | DYFKQRFQAV | TNPAIDPLRE  | GLVMSLEVN  | GKRGNILEVG  | PENAXQVILS  | SPVLNEGELE  | XLLKDKPKLP  |     |



|             |                |              |             |             |               |              |              |               |      |
|-------------|----------------|--------------|-------------|-------------|---------------|--------------|--------------|---------------|------|
|             |                | 740          |             | 760         |               | 780          |              | 800           |      |
| SpFd-GOGAT  | QVLPTFFD I G   | KGIDGSLQKA   | LEELCEAADE  | AVRNGSQLL I | LSDRSEEL I EP | TRPAIPILLA   | VGAVHQHL I Q | NGLRMSAS I V  | 754  |
| OsFd-GOGAT  | KVLSTYFD I R   | KGLDGS LDKA  | IKVLCD EADA | AVRNGSQLLV  | LSDRSEALEP    | TRPAIPILLA   | VGAIHQHL I Q | NGLRMSAS I V  | 742  |
| BdFd-GOGAT  | TVLSTYFS I R   | KGLDGS LDKA  | IKALCEEADA  | AVRSGSQLLV  | LSDRSEALEP    | TRPAIPILLA   | VGAIHQHL I Q | NGLRMSAS I V  | 735  |
| SbFd-GOGAT  | KVLSTYFD I R   | KGLDGS LDKT  | IQALCEEADA  | AVRSGSQLLV  | LSDRSEALEP    | TRPAIPILLA   | VGAIHQHL I Q | NGLRMSAS I V  | 744  |
| AtFd-GOGAT1 | KVLSTYFD I R   | KGVEGSLQKA   | LYYLCEAA DD | AVRSGSQLLV  | LSDRSDRL EP   | TRPSIPIMLA   | VGAVHQHL I Q | NGLRMSAS I V  | 777  |
| AtFd-GOGAT2 | QILPTFFD I R   | RGIEGSLKKG   | LLKLCEAADE  | AVRNGSQLLV  | LSDRSDNPEP    | TRPAIPMLLA   | VGAVHQHL I Q | NGLRMSAS I I  | 753  |
| NnFdGOGAT   | QVLPTFFD I R   | KGLDGSLEKT   | IKKLCEADA E | AVRNGSQLL I | LSDRSEEL EP   | TRPAIPILLA   | VGSVHQHL I Q | NGLRMSAS I V  | 760  |
| Consensus   | XVLSTYFD I R   | KGLDGS LDKA  | IKXLCEXAD X | AVRNGSQLLV  | LSDRSEALEP    | TRPAIPILLA   | VGAVHQHL I Q | NGLRMSAS I V  |      |
|             |                | 820          |             | 840         |               | 860          |              | 880           |      |
| SpFd-GOGAT  | ADTAQCFSTH     | QFACL IGYGA  | SAICPYLA FE | TCRQWRLSTK  | TVNLMKNGKM    | PTVTMEQCQR   | NFSKAVK SGL  | LKILSKMG I S  | 834  |
| OsFd-GOGAT  | ADTAQCFSTH     | QFACL IGYGA  | SAICPYLA FE | TCRQWRLSNK  | TVNLMRNGKM    | PTVTIEQAQR   | NFIKAVK SGL  | LKILSKMG I S  | 822  |
| BdFd-GOGAT  | ADTAQCFSTH     | QFACL IGYGA  | SAICPYLA FE | TCRQWRLSNK  | TVNLMRNGKM    | PTVTIEQAQR   | NFIKAVK SGL  | LKILSKMG I S  | 815  |
| SbFd-GOGAT  | ADTAQCFSTH     | HFACL IGYGA  | SAVCPYLA FE | TCRQWRLSNK  | TVNLMRNGKM    | PTVTIEQAQR   | NFTKAVK LGL  | LKILSKMG I S  | 824  |
| AtFd-GOGAT1 | ADTAQCFSTH     | HFACL VGYGA  | SAVCPYLA FE | TCRQWRLSNK  | TVAFMRNGK I   | PTVTIEQAQK   | NYTKAVNAGL   | LKILSKMG I S  | 857  |
| AtFd-GOGAT2 | ADTAQCFSTH     | HFACL IGYGA  | SAICPHLA FE | TCRQWRLSNK  | TVNMMRNGKM    | PTVTMEQAQK   | NYRKAVNTGL   | LKVL SKMG I S | 833  |
| NnFdGOGAT   | ADTAQCFSTH     | QFACL IGYGA  | SAVCPYLA FE | TCRQWRLSTK  | TVNLMRNGKM    | PTVTMEQAQR   | NFKAVK SGL   | LKILSKMG I S  | 840  |
| Consensus   | ADTAQCFSTH     | QFACL IGYGA  | SAICPYLA FE | TCRQWRLSNK  | TVNLMRNGKM    | PTVTIEQAQR   | NFXKAVK SGL  | LKILSKMG I S  |      |
|             |                | 900          |             | 920         |               | 940          |              | 960           |      |
| SpFd-GOGAT  | LLSSYCGAQ I    | FEIYGLGHD I  | VDAFCGSVS   | KIGGLNFDEL  | ARETLSFWVK    | AFSEDTAKRL   | ENFGFIQFRP   | GGEYHGNPQ     | 914  |
| OsFd-GOGAT  | LLSSYCGAQ I    | FEIYGLGQEV   | VDAFCGSVS   | KIGGLTLDEL  | GRETLSFWVK    | AFSEDTAKRL   | ENFGFIQSRP   | GGEYHANNPE    | 902  |
| BdFd-GOGAT  | LLSSYCGAQ I    | FEIYGLGQEV   | VDAFCGSVS   | KIGGLTLDEL  | GRETLSFWVK    | AFSEDTAKRL   | ENFGFIQSRP   | GGEFHANNPE    | 895  |
| SbFd-GOGAT  | LLSSYCGAQ I    | FEIYGLGQEV   | VDAFCGSVS   | KIGGLTLDEL  | GRETLSFWVK    | AFSEDTAKRL   | ENFGFIQSRP   | GGEYHANNPE    | 904  |
| AtFd-GOGAT1 | LLSSYCGAQ I    | FEIYGLGQDV   | VDAFTGGSVS  | KISGLTFDEL  | ARETLSFWVK    | AFSEDTTKRL   | ENFGFIQFRP   | GGEYHNNPPE    | 937  |
| AtFd-GOGAT2 | LFSSYCGAQ I    | FEIYGLGNEV   | VEFSFRGSAS  | KIGGLTLDEL  | ARETLTFWVR    | AFSEDTAKRL   | ENFGFIQFRP   | GGEYHGNPPE    | 913  |
| NnFdGOGAT   | LLSSYCGAQ I    | FEIYGLGKDI   | VDAFCGSVS   | NIGGLTLDEL  | ARETLSFWVK    | AFSEDTAKRL   | ENFGFIQFRP   | GGEYHGNPPE    | 920  |
| Consensus   | LLSSYCGAQ I    | FEIYGLGQEV   | VDAFCGSVS   | KIGGLTLDEL  | ARETLSFWVK    | AFSEDTAKRL   | ENFGFIQFRP   | GGEYHNNPPE    |      |
|             |                | 980          |             | 1,000       |               | 1,020        |              | 1,040         |      |
| SpFd-GOGAT  | MSKLLHKA VR    | QKSESA YAVY  | QQHLASRPVS  | VLRDLLEFKS  | DRAPIPVGKV    | EPASSIVORF   | CTGGMSLGA I  | SRETHEA I A I | 994  |
| OsFd-GOGAT  | MSKLLHKA VR    | EKSDNAYTVY   | QQHLASRPVN  | VLRDLLELKS  | DRAPIPIGKV    | EPATSI VERF  | CTGGMSLGA I  | SRETHEA I A I | 982  |
| BdFd-GOGAT  | MSKLLHKA I R   | EKSDNAYTIY   | QQHLASRPVN  | VLRDLVELKS  | DRAPIPIGKV    | EPATSI VERF  | CTGGMSLGA I  | SRETHEA I A I | 975  |
| SbFd-GOGAT  | MTKLLHKA I R   | EKRDNAYTVY   | QQHLASRPVN  | VLRDLLELKS  | DRAPIPIGKV    | EPATSI VERF  | CTGGMSLGA I  | SRETHEA I A I | 984  |
| AtFd-GOGAT1 | MSKLLHKA VR    | EKSETAYAVY   | QQHLASRPVN  | VLRDLLEFKS  | DRAPIPVGKV    | EPAVAI VORF  | CTGGMSLGA I  | SRETHEA I A I | 1017 |
| AtFd-GOGAT2 | MSKLLHKA VR    | EKSETAYAVY   | QQHLANRPIT  | VFRDLLEFKS  | DRNP IPVGKV   | EPASSI VERF  | CTGGMSLGA I  | SRETHEA I A I | 993  |
| NnFdGOGAT   | MSKLLHKA VR    | QKNESVYSIY   | QQHLANRPVN  | VLRDLLEFKS  | DRPPIPVGKV    | ESAA SI VORF | CTGGMSLGA I  | SRETHEA I A I | 1000 |
| Consensus   | MSKLLHKA VR    | EKSENAYXVY   | QQHLASRPVN  | VLRDLLEFKS  | DRAPIPVGKV    | EPATSI VERF  | CTGGMSLGA I  | SRETHEA I A I |      |
|             |                | 1,060        |             | 1,080       |               | 1,100        |              | 1,120         |      |
| SpFd-GOGAT  | AMNRLGGKSN     | SGEGGEDP I R | WNPLTDVTDG  | YSPTLPHLKG  | LQNGDTATSA    | IKQVASGRFG   | VTPTFLVNAD   | QLEIK I AQGA  | 1074 |
| OsFd-GOGAT  | AMNR IGGKSN    | SGEGGEDP I R | WSPLADVEDG  | YSPTLPHLKG  | LQNGDTATSA    | IKQVASGRFG   | VTPTFLVNAE   | QIEIK I AQGA  | 1062 |
| BdFd-GOGAT  | AMNR IGGKSN    | SGEGGEDP I R | WSPLADVDDG  | YSPTLPHLKG  | LQNGDTATSA    | IKQVASGRFG   | VTPTFLVNAE   | QIEIK I AQGA  | 1055 |
| SbFd-GOGAT  | AMNR IGGKSN    | SGEGGEDP I R | WNPLTDVVDDG | YSPTLPHLKG  | LQNGDTATSA    | IKQVASGRFG   | VTPTFLVNAN   | QIEIK I AQGA  | 1064 |
| AtFd-GOGAT1 | AMNR IGGKSN    | SGEGGEDP I R | WKPLTDVVDDG | YSPTLPHLKG  | LQNGDIATSA    | IKQVASGRFG   | VTPTFLVNAD   | QLEIKVAQGA    | 1097 |
| AtFd-GOGAT2 | AMNRLGGKSN     | SGEGGEDP I R | WKPLTDVVDDG | YSSTLPHLKG  | LQNGDTATSA    | IKQVASGRFG   | VTPTFLVNAD   | QLEIKVAQGA    | 1073 |
| NnFdGOGAT   | AMNRLGGKSN     | SGEGGEDP I R | WSPLTDVVDDG | YSPTLPHLKG  | LQNGDTATSA    | IKQVASGRFG   | VTPTFLVNAD   | QLEIK I AQGA  | 1080 |
| Consensus   | AMNR IGGKSN    | SGEGGEDP I R | WSPLTDVVDDG | YSPTLPHLKG  | LQNGDTATSA    | IKQVASGRFG   | VTPTFLVNAD   | QLEIK I AQGA  |      |
|             |                | 1,140        |             | 1,160       |               | 1,180        |              | 1,200         |      |
| SpFd-GOGAT  | KPGEGGQLPG     | KKVSAYIARL   | RNSKPGVPLI  | SPPPHHDIYS  | IEDLAQLIYD    | LHQVNP KAKV  | SVKLVAEAGI   | GTVASGVAKG    | 1154 |
| OsFd-GOGAT  | KPGEGGQLPG     | KKVSAYIARL   | RNSKPGVPLI  | SPPPHHDIYS  | IEDLAQLIYD    | LHQINPKAKV   | SVKLVAEAGI   | GTVASGVSKG    | 1142 |
| BdFd-GOGAT  | KPGEGGQLPG     | KKVSAYIARL   | RNSKPGVPLI  | SPPPHHDIYS  | IEDLAQLIYD    | LHQINPKAKV   | SVKLVAEAGI   | GTVASGVSKA    | 1135 |
| SbFd-GOGAT  | KPGEGGQLPG     | KKVSAYIARL   | RNSKPGVPLI  | SPPPHHDIYS  | IEDLAQLIYD    | LHQINPKAKV   | SVKLVSEAGI   | GTVASGVSKG    | 1144 |
| AtFd-GOGAT1 | KPGEGGQLPG     | KKVSAYIARL   | RSSKPGVPLI  | SPPPHHDIYS  | IEDLAQLIYD    | LHQINPNKAV   | SVKLVAEAGI   | GTVASGVAKG    | 1177 |
| AtFd-GOGAT2 | KPGEGGQLPG     | KKVSAYIARL   | RNSKPGVPLI  | SPPPHHDIYS  | IEDLAQLIYD    | LHQVNP KAKV  | SVKLVSETGI   | GTVASGVAKG    | 1153 |
| NnFdGOGAT   | KPGEGGQLPG     | KKVSAYIARL   | RNSKPGVPLI  | SPPPHHDIYS  | IEDLAQLIYD    | LHQVNP KAKV  | SVKLVAEAGI   | GTVASGVAKG    | 1160 |
| Consensus   | KPGEGGQLPG     | KKVSAYIARL   | RNSKPGVPLI  | SPPPHHDIYS  | IEDLAQLIYD    | LHQINPKAKV   | SVKLVAEAGI   | GTVASGVAKG    |      |
|             |                | 1,220        |             | 1,240       |               | 1,260        |              | 1,280         |      |
| SpFd-GOGAT  | NADI I Q I SGH | DGGTGASPI S  | SIKHAGGPWE  | LGLAETHQTL  | IANGLRERV I   | LRVDGGFKSG   | VDVLMAA SMG  | ADEYGFGSVA    | 1234 |
| OsFd-GOGAT  | NADI I Q I SGH | DGGTGASPI S  | SIKHAGGPWE  | LGLSETHQTL  | IQNGLRERVV    | LRVDGGFRSG   | LDVLMAAAMG   | ADEYGFGSVA    | 1222 |
| BdFd-GOGAT  | NADVIQ I SGH   | DGGTGASPI S  | SIKHAGGPWE  | LGLTETHQTL  | IQNGLRERVV    | LRVDGGFRSG   | LDVLLAAAMG   | ADEYGFGSVA    | 1215 |
| SbFd-GOGAT  | NADI I Q I SGH | DGGTGASPI S  | SIKHAGGPWE  | LGLTETHQTL  | IQNGLRERVV    | LRVDGGFRSG   | RDVLMAAAMG   | ADEYGFGSVA    | 1224 |
| AtFd-GOGAT1 | NADI I Q I SGH | DGGTGASPI S  | SIKHAGGPWE  | LGLTETHQTL  | IANGLRERV I   | LRVDGGGLKSG  | VDVLMAAAMG   | ADEYGFGLSA    | 1257 |
| AtFd-GOGAT2 | NADI I Q I SGY | DGGTGASPI S  | SIKHAGGPWE  | LGLAETQKTL  | IANGLRERV I   | LRVDGGFKSG   | VDVLI AAAMG  | ADEYGFGLTA    | 1233 |
| NnFdGOGAT   | NADI I Q I SGH | DGGTGASPI S  | SIKHAGGPWE  | LGLTETHQTL  | IENGLRERV I   | LRVDGGFKSG   | VDVLMAAAMG   | ADEYGFGSVA    | 1240 |
| Consensus   | NADI I Q I SGH | DGGTGASPI S  | SIKHAGGPWE  | LGLTETHQTL  | IQNGLRERV I   | LRVDGGFKSG   | VDVLMAAAMG   | ADEYGFGSVA    |      |
|             |                | 1,300        |             | 1,320       |               | 1,340        |              | 1,360         |      |
| SpFd-GOGAT  | MIATGCVMAR     | ICHTNNCPVG   | VASQREELRA  | RFPGVPGDLV  | NYFLYVAEEV    | RGILAQLGYE   | KMDDVI GRTD  | LLRPRHVS L M  | 1314 |
| OsFd-GOGAT  | MIATGCVMAR     | ICHTNNCPVG   | VASQREELRA  | RFPGVPGDLV  | NYFLFVAEEV    | RATLAQLGFE   | KLDDI I GRTD | ILKAKHVS L A  | 1302 |
| BdFd-GOGAT  | MIATGCVMAR     | ICHTNNCPVG   | VASQREELRA  | RFPGVPGDLV  | NYFLFVAEEV    | RATLAQLGYE   | KLDDI TGRD   | LLKPKHVS L V  | 1295 |
| SbFd-GOGAT  | MIATGCVMAR     | ICHTNNCPVG   | VASQREELRA  | RFPGVPGDLV  | NYFLFVAEEV    | RATLAQLGYE   | KLDDVI GRTD  | LLKPKHVS L V  | 1304 |
| AtFd-GOGAT1 | MIATGCVMAR     | ICHTNNCPVG   | VASQREELRA  | RFPGVPGDLV  | NYFLYVAEEV    | RGILAQLGYN   | SLDDI I GRTE | LLRPDI S L V  | 1337 |
| AtFd-GOGAT2 | MIATGCI MAR    | ICHTNNCPVG   | VASQREELRA  | RFPGLPGDLV  | NFFLYIAEEV    | RGILAQLGYE   | KLDDI I GRTD | LLKARDI S L V | 1313 |
| NnFdGOGAT   | MIATGCVMAR     | ICHTNNCPVG   | VASQREELRA  | RFPGVPGDLV  | NYFMFVAEEV    | RGILAQLGYE   | KMDDI I GRTD | ILRPNI S L V  | 1320 |
| Consensus   | MIATGCVMAR     | ICHTNNCPVG   | VASQREELRA  | RFPGVPGDLV  | NYFLYVAEEV    | RGILAQLGYE   | KLDDI I GRTD | LLKPRHVS L V  |      |
|             |                | 1,380        |             | 1,400       |               | 1,420        |              | 1,440         |      |
| SpFd-GOGAT  | KTQQIDL SYL    | LSSVGLPKWS   | STEIRNQPVH  | TNGPVLD DVL | LSDPEI TEA I  | EKEKVVNKTI   | KIYNVDRAVC   | GR IAGV IAKK  | 1394 |
| OsFd-GOGAT  | KTQHIDL KYL    | LSSAGLPKWS   | SSQIRSQDVH  | SNGPVLD ETL | LADPD I SDAI  | ENEKEVSKTF   | KIYNVDRAVC   | GRVAGV IAKK   | 1382 |
| BdFd-GOGAT  | KTQHIDL GYL    | LMNSGLPKWS   | SSQIRSQDVH  | SNGPVLD ETL | LADPEVSDAI    | ENEKEVSKTF   | KIYNVDRAVC   | GRVAGV IAKK   | 1375 |
| SbFd-GOGAT  | KTQHIDL GYL    | LSNAGLPKWS   | SSQIRSQDVH  | TNGPVLD ETL | LADPEI ADI A  | ENEKEVSKTF   | KIYNVDRAVC   | GRVAGV IAKK   | 1384 |
| AtFd-GOGAT1 | KTQHL DLSYL    | LSSVGTSPLS   | STEIRKQEVH  | TNGPVLDDDI  | LADPLV IDAI   | ENEKVVEKTV   | KIYNVDRAVC   | GRVAGV IAKK   | 1417 |
| AtFd-GOGAT2 | KT - HLDLSYL   | LSSVGLPKRS   | STSIRKQEVH  | SNGPVLD DTL | LQDPEI MDAI   | ENEKTVHKTM   | KIYNVDRSVC   | GR IAGV IAKK  | 1392 |
| NnFdGOGAT   | KTQHL DLSYI    | LSSVGLPKLS   | STKIRNQDVH  | TNGPVLD DVI | LSDPEI SDAI   | ENEKVVNKTI   | KIYNVDRAVC   | GR IAGV VAKK  | 1400 |
| Consensus   | KTQHIDL SYL    | LSSVGLPKWS   | STQIRSQDVH  | TNGPVLD DTL | LADPEI SDAI   | ENEKXVSKTF   | KIYNVDRAVC   | GRVAGV IAKK   |      |

|             |            |            |            |            |            |             |            |             |                 |
|-------------|------------|------------|------------|------------|------------|-------------|------------|-------------|-----------------|
|             |            | 1,460      |            | 1,480      |            | 1,500       |            | 1,520       |                 |
| SpFd-GOGAT  | YGD        | TGFAGQL    | NITFMGSAGQ | SFGCFLTPGM | NIRLVGEAND | YVGKGMAGGE  | LVLTPPENFG | FCPEEATIVG  | NTCLYGATGG 1474 |
| OsFd-GOGAT  | YGD        | TGFAGQL    | NITFTGSAGQ | SFGCFLTPGM | NIRLVGEAND | YVGKGMAGGE  | LVVVPVEKTG | FVPEDAAIVG  | NTCLYGATGG 1462 |
| BdFd-GOGAT  | YGD        | TGFAGQL    | NITFTGSAGQ | SFGCFLTPGM | NVRLVGEAND | YVGKGMAGGE  | LVVVPVDDTG | FVPEEAAIVG  | NTCLYGATGG 1455 |
| SbFd-GOGAT  | YGD        | TGFAGQL    | NITFNGSAGQ | SFGCFLTPGM | NIRLVGEAND | YVGKGMAGGE  | LVVVPVDKTG | FVPEDATIVG  | NTCLYGATGG 1464 |
| AtFd-GOGAT1 | YGD        | TGFAGQV    | NLTFLGSAGQ | SFGCFLIPGM | NIRLIGESND | YVGKGMAGGE  | IVVTPVEKIG | FVPEEATIVG  | NTCLYGATGG 1497 |
| AtFd-GOGAT2 | YGD        | TGFAGQL    | NLTFTGSAGQ | SFACFLTPGM | NIRLVGEAND | YVGKGMAGGE  | VVILPVESTG | FRPEDATIVG  | NTCLYGATGG 1472 |
| NnFdGOGAT   | YGD        | TGFAGQL    | NITFTGSAGQ | SFACFLTPGM | NIRLIGEAND | YVGKSMAGGE  | LVVTPVENTG | FCPEDATIVG  | NTCLYGATGG 1480 |
| Consensus   | YGD        | TGFAGQL    | NITFTGSAGQ | SFGCFLTPGM | NIRLVGEAND | YVGKGMAGGE  | LVVXPVEKTG | FVPEDATIVG  | NTCLYGATGG      |
|             |            | 1,540      |            | 1,560      |            | 1,580       |            | 1,600       |                 |
| SpFd-GOGAT  | QLF        | VRGKAGE    | RFAVRNSLTE | AVVEGTGDHC | CEYMTGGCVV | VLGKVGRNVA  | AGMTGGLAYI | LDEDDTL LPK | VNREIVRMQR 1554 |
| OsFd-GOGAT  | QVF        | VRGKTGE    | RFAVRNSLQ  | AVVEGTGDHC | CEYMTGGCVV | VLGKVGRNVA  | AGMTGGLAYI | LDEDDTL LPK | VNKEIVKMQR 1542 |
| BdFd-GOGAT  | QVF        | VRGKTGE    | RFAVRNSLQ  | AVVEGTGDHC | CEYMTGGCVV | VLGKVGRNVA  | AGMTGGLAYI | LDEDDTL LPK | VNKEIVKMQR 1535 |
| SbFd-GOGAT  | QVF        | VRGKAGE    | RFAVRNSLCQ | AVVEGTGDHC | CEYMTGGCVV | VLGKAGR NVA | AGMTGGLAYI | LDEDDTL LPK | VNKEIVKMQR 1544 |
| AtFd-GOGAT1 | QIF        | ARGKAGE    | RFAVRNSLA  | AVVEGTGDHC | CEYMTGGCVV | VLGKVGRNVA  | AGMTGGLAYL | LDEDDTL LPK | INREIVKIQR 1577 |
| AtFd-GOGAT2 | LLF        | VRGKAGE    | RFAVRNSLAQ | AVVEGTGDHC | CEYMTGGCVV | ILGKVGRNVA  | AGMTGGLAYI | LDEDDTL LPK | MNKEIVKIQR 1552 |
| NnFdGOGAT   | QVF        | VRGKAGE    | RFAVRNSLAQ | AVVEGTGDHC | CEYMTGGCVV | VLGKVGRNVA  | AGMTGGLAYI | LDEDDTL LPK | VNKEIVKIQR 1560 |
| Consensus   | QVF        | VRGKAGE    | RFAVRNSLAQ | AVVEGTGDHC | CEYMTGGCVV | VLGKVGRNVA  | AGMTGGLAYI | LDEDDTL LPK | VNKEIVKMQR      |
|             |            | 1,620      |            | 1,640      |            | 1,660       |            |             |                 |
| SpFd-GOGAT  | VNAPV      | GQMQL      | KSLIEAHVEK | TGSTKGATIL | REWEAYLPLF | WQIVPPSEED  | TPEASAEIQR | V-PT-K----  | EMQSA---- 1623  |
| OsFd-GOGAT  | VNAPAGQMQL | KGLIEAYVEK | TGSEKGATIL | REWEAYLPLF | WQLVPPSEED | SPEACAEFER  | VLAKQA---T | TVQSAK---   | 1615            |
| BdFd-GOGAT  | VNAPAGQMQL | KGLIEAYVEK | TGSVKGAKIL | SEWEAYLPLF | WQLVPPSEED | SPEACAEFER  | VLARQA---T | AVQSAK---   | 1608            |
| SbFd-GOGAT  | VNAPAGQMQL | KSLIESYVEK | TGSEKGATIL | REWEAYLPLF | WQLVPPSEED | SPEACAEFER  | VLAKQAKQAT | TQLSAK---   | 1620            |
| AtFd-GOGAT1 | VTAPAGELQL | KSLIEAHVEK | TGSSKGATIL | NEWKEYLPLF | WQLVPPSEED | TPEASAAAYVR | TSTGEV---- | TFQSA----   | 1648            |
| AtFd-GOGAT2 | VTSPVGTQL  | KSLIEAHVEK | TGSSKGAMIV | EEWDKYLAMF | WQLVPPSEED | TPEANSD--H  | ILKTTTGDEE | QVSSTLAEK   | 1629            |
| NnFdGOGAT   | VNAPAGQIQL | KSLIEAHVEK | TGSNKGSAIL | KDWEAYLPLF | WQLVPPSEED | TPEACADFER  | ISPGQV---- | TLQKA----   | 1631            |
| Consensus   | VNAPAGQMQL | KSLIEAHVEK | TGSXKGATIL | REWEAYLPLF | WQLVPPSEED | TPEACAEFER  | VLAXQA---T | TVQSAK---   |                 |

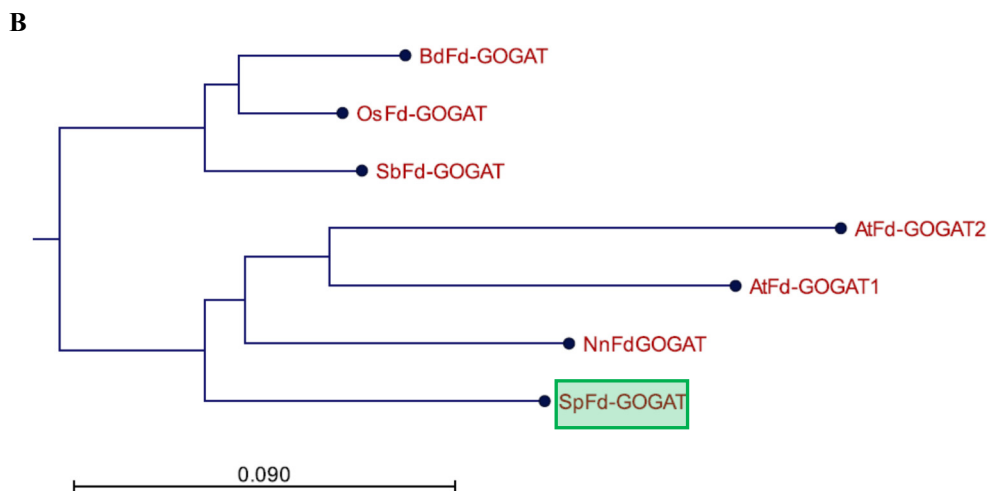

**Figure S11.** Sequence alignment of Fd-GOGAT protein from *S. polyrhiza* with other representative species **(A)** and the resulted phylogenetic tree **(B)**. AtFd-GOGAT1 - *A. thaliana*, NP\_850763.1, AtFd-GOGAT2 - *A. thaliana*, NP\_181655.1, BdFd-GOGAT - *B. distachyon*, XP\_003559858.1, NnFd-GOGAT - *N. nucifera*, XP\_010276670, OsFd-GOGAT - *O. sativa*, XP\_015646712.1, SbFd-GOGAT - *S. bicolor*, XP\_002463318.2, SpFdGOGAT - *S. polyrhiza* (sequence translated from Acc. ID MZ605910)



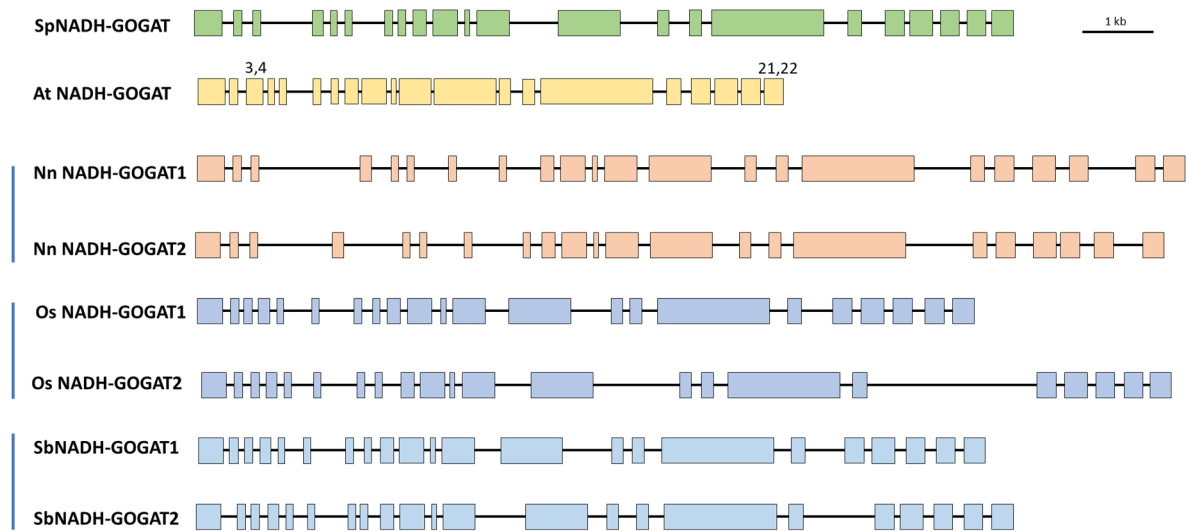

**Figure S12.** Diagrammatic representation of the structure of *NADH-GOGAT* genes. Coding sequences are colored boxes. Introns are black lines. The bar is 1 kb. *At NADH-GOGAT* - *A. thaliana*, At5g53460, *NnNADH-GOGAT1* - *N. nucifera*, LOC104600364, *NnNADH-GOGAT2* - *N. nucifera*, LOC104604004, *OsNADH-GOGAT1* - *O. sativa*, LOC4324398, *OsNADH-GOGAT2* - *O. sativa*, LOC4339561, *SbNADH-GOGAT1* - *S. bicolor*, LOC8068026, *SbNADH-GOGAT* - *S. bicolor*, LOC8074568, *SpNADH-GOGAT* - *S. polyrhiza* CP019094, the 8<sup>th</sup> chromosome, position from 4978991 to 4990379.

A

|  |  |  |  |  |  |  |  |  |  |  |  |  |  |  |  |  |  |  |  |  |  |  |  |  |  |  |  |  |  |  |  |  |  |  |  |  |  |  |  |  |  |  |  |  |  |  |  |  |  |  |  |  |  |  |  |  |  |  |  |  |  |  |  |  |  |  |  |  |  |  |  |  |  |  |  |  |  |  |  |  |  |  |  |  |  |  |  |  |  |  |  |  |  |  |  |  |  |  |  |  |  |  |  |  |  |  |  |  |  |  |  |  |  |  |  |  |  |  |  |  |  |  |  |  |  |  |  |  |  |  |  |  |  |  |  |  |  |  |  |  |  |  |  |  |  |  |  |  |  |  |  |  |  |  |  |  |  |  |  |  |  |  |  |  |  |  |  |  |  |  |  |  |  |  |  |  |  |  |  |  |  |  |  |  |  |  |  |  |  |  |  |  |  |  |  |  |  |  |  |  |  |  |  |  |  |  |  |  |  |  |  |  |  |  |  |  |  |  |  |  |  |  |  |  |  |  |  |  |  |  |  |  |  |  |  |  |  |  |  |  |  |  |  |  |  |  |  |  |  |  |  |  |  |  |  |  |  |  |  |  |  |  |  |  |  |  |  |  |  |  |  |  |  |  |  |  |  |  |  |  |  |  |  |  |  |  |  |  |  |  |  |  |  |  |  |  |  |  |  |  |  |  |  |  |  |  |  |  |  |  |  |  |  |  |  |  |  |  |  |  |  |  |  |  |  |  |  |  |  |  |  |  |  |  |  |  |  |  |  |  |  |  |  |  |  |  |  |  |  |  |  |  |  |  |  |  |  |  |  |  |  |  |  |  |  |  |  |  |  |  |  |  |  |  |  |  |  |  |  |  |  |  |  |  |  |  |  |  |  |  |  |  |  |  |  |  |  |  |  |  |  |  |  |  |  |  |  |  |  |  |  |  |  |  |  |  |  |  |  |  |  |  |  |  |  |  |  |  |  |  |  |  |  |  |  |  |  |  |  |  |  |  |  |  |  |  |  |  |  |  |  |  |  |  |  |  |  |  |  |  |  |  |  |  |  |  |  |  |  |  |  |  |  |  |  |  |  |  |  |  |  |  |  |  |  |  |  |  |  |  |  |  |  |  |  |  |  |  |  |  |  |  |  |  |  |  |  |  |  |  |  |  |  |  |  |  |  |  |  |  |  |  |  |  |  |  |  |  |  |  |  |  |  |  |  |  |  |  |  |  |  |  |  |  |  |  |  |  |  |  |  |  |  |  |  |  |  |  |  |  |  |  |  |  |  |  |  |  |  |  |  |  |  |  |  |  |  |  |  |  |  |  |  |  |  |  |  |  |  |  |  |  |  |  |  |  |  |  |  |  |  |  |  |  |  |  |  |  |  |  |  |  |  |  |  |  |  |  |  |  |  |  |  |  |  |  |  |  |  |  |  |  |  |  |  |  |  |  |  |  |  |  |  |  |  |  |  |  |  |  |  |  |  |  |  |  |  |  |  |  |  |  |  |  |  |  |  |  |  |  |  |  |  |  |  |  |  |  |  |  |  |  |  |  |  |  |  |  |  |  |  |  |  |  |  |  |  |  |  |  |  |  |  |  |  |  |  |  |  |  |  |  |  |  |  |  |  |  |  |  |  |  |  |  |  |  |  |  |  |  |  |  |  |  |  |  |  |  |  |  |  |  |  |  |  |  |  |  |  |  |  |  |  |  |  |  |  |  |  |  |  |  |  |  |  |  |  |  |  |  |  |  |  |  |  |  |  |  |  |  |  |  |  |  |  |  |  |  |  |  |  |  |  |  |  |  |  |  |  |  |  |  |  |  |  |  |  |  |  |  |  |  |  |  |  |  |  |  |  |  |  |  |  |  |  |  |  |  |  |  |  |  |  |  |  |  |  |  |  |  |  |  |  |  |  |  |  |  |  |  |  |  |  |  |  |  |  |  |  |  |  |  |  |  |  |  |  |  |  |  |  |  |  |  |  |  |  |  |  |  |  |  |  |  |  |  |  |  |  |  |  |  |  |  |  |  |  |  |  |  |  |  |  |  |  |  |  |  |  |  |  |  |  |  |  |  |  |  |  |  |  |  |  |  |  |  |  |  |  |  |  |  |  |  |  |  |  |  |  |  |  |  |  |  |  |  |  |  |  |  |  |  |  |  |  |  |  |  |  |  |  |  |  |  |  |  |  |  |  |  |  |  |  |  |  |  |  |  |  |  |  |  |  |  |  |  |  |  |  |  |  |  |  |  |  |  |  |  |  |  |  |  |  |  |  |  |  |  |  |  |  |  |  |  |  |  |  |  |  |  |  |  |  |  |  |  |  |  |  |  |  |  |  |  |  |  |  |  |  |  |  |  |  |  |  |  |  |  |  |  |  |  |  |  |  |  |  |  |  |  |  |  |  |  |  |  |  |  |  |  |  |  |  |  |  |  |  |  |  |  |  |  |  |  |  |  |  |  |  |  |  |  |  |  |  |  |  |  |  |  |  |  |  |  |  |  |  |  |  |  |  |  |  |  |  |  |  |  |  |  |  |  |  |  |  |  |  |  |  |  |  |  |  |  |  |  |  |  |  |  |  |  |  |  |  |  |  |  |  |  |  |  |  |  |  |  |  |  |  |  |  |  |  |  |  |  |  |  |  |  |  |  |  |  |  |  |  |  |  |  |  |  |  |  |  |  |  |  |  |  |  |  |  |  |  |  |  |  |  |  |  |  |  |  |  |  |  |  |  |  |  |  |  |  |  |  |  |  |  |  |  |  |  |  |  |  |  |  |  |  |  |  |  |  |  |  |  |  |  |  |  |  |  |  |  |  |  |  |  |  |  |  |  |  |  |  |  |  |  |  |  |  |  |  |  |  |  |  |  |  |  |  |  |  |  |  |  |  |  |  |  |  |  |  |  |  |  |  |  |  |  |  |  |  |  |  |  |  |  |  |  |  |  |  |  |  |  |  |  |  |  |  |  |  |  |  |  |  |  |  |  |  |  |  |  |  |  |  |  |  |  |  |  |  |  |  |  |  |  |  |  |  |  |  |  |  |  |  |  |  |  |  |  |  |  |  |  |  |  |  |  |  |  |  |  |  |  |  |  |  |  |  |  |  |  |  |  |  |  |  |  |  |  |  |  |  |  |  |  |  |  |  |  |  |  |  |  |  |  |  |  |  |  |  |  |  |  |  |  |  |  |  |  |  |  |  |  |  |  |  |  |  |  |  |  |  |  |  |  |  |  |  |  |  |  |  |  |  |  |  |  |  |  |  |  |  |  |  |  |  |  |  |  |  |  |  |  |  |  |  |  |  |  |  |  |  |  |  |  |  |  |  |  |  |  |  |  |  |  |  |  |  |  |  |  |  |  |  |  |  |  |  |
|--|--|--|--|--|--|--|--|--|--|--|--|--|--|--|--|--|--|--|--|--|--|--|--|--|--|--|--|--|--|--|--|--|--|--|--|--|--|--|--|--|--|--|--|--|--|--|--|--|--|--|--|--|--|--|--|--|--|--|--|--|--|--|--|--|--|--|--|--|--|--|--|--|--|--|--|--|--|--|--|--|--|--|--|--|--|--|--|--|--|--|--|--|--|--|--|--|--|--|--|--|--|--|--|--|--|--|--|--|--|--|--|--|--|--|--|--|--|--|--|--|--|--|--|--|--|--|--|--|--|--|--|--|--|--|--|--|--|--|--|--|--|--|--|--|--|--|--|--|--|--|--|--|--|--|--|--|--|--|--|--|--|--|--|--|--|--|--|--|--|--|--|--|--|--|--|--|--|--|--|--|--|--|--|--|--|--|--|--|--|--|--|--|--|--|--|--|--|--|--|--|--|--|--|--|--|--|--|--|--|--|--|--|--|--|--|--|--|--|--|--|--|--|--|--|--|--|--|--|--|--|--|--|--|--|--|--|--|--|--|--|--|--|--|--|--|--|--|--|--|--|--|--|--|--|--|--|--|--|--|--|--|--|--|--|--|--|--|--|--|--|--|--|--|--|--|--|--|--|--|--|--|--|--|--|--|--|--|--|--|--|--|--|--|--|--|--|--|--|--|--|--|--|--|--|--|--|--|--|--|--|--|--|--|--|--|--|--|--|--|--|--|--|--|--|--|--|--|--|--|--|--|--|--|--|--|--|--|--|--|--|--|--|--|--|--|--|--|--|--|--|--|--|--|--|--|--|--|--|--|--|--|--|--|--|--|--|--|--|--|--|--|--|--|--|--|--|--|--|--|--|--|--|--|--|--|--|--|--|--|--|--|--|--|--|--|--|--|--|--|--|--|--|--|--|--|--|--|--|--|--|--|--|--|--|--|--|--|--|--|--|--|--|--|--|--|--|--|--|--|--|--|--|--|--|--|--|--|--|--|--|--|--|--|--|--|--|--|--|--|--|--|--|--|--|--|--|--|--|--|--|--|--|--|--|--|--|--|--|--|--|--|--|--|--|--|--|--|--|--|--|--|--|--|--|--|--|--|--|--|--|--|--|--|--|--|--|--|--|--|--|--|--|--|--|--|--|--|--|--|--|--|--|--|--|--|--|--|--|--|--|--|--|--|--|--|--|--|--|--|--|--|--|--|--|--|--|--|--|--|--|--|--|--|--|--|--|--|--|--|--|--|--|--|--|--|--|--|--|--|--|--|--|--|--|--|--|--|--|--|--|--|--|--|--|--|--|--|--|--|--|--|--|--|--|--|--|--|--|--|--|--|--|--|--|--|--|--|--|--|--|--|--|--|--|--|--|--|--|--|--|--|--|--|--|--|--|--|--|--|--|--|--|--|--|--|--|--|--|--|--|--|--|--|--|--|--|--|--|--|--|--|--|--|--|--|--|--|--|--|--|--|--|--|--|--|--|--|--|--|--|--|--|--|--|--|--|--|--|--|--|--|--|--|--|--|--|--|--|--|--|--|--|--|--|--|--|--|--|--|--|--|--|--|--|--|--|--|--|--|--|--|--|--|--|--|--|--|--|--|--|--|--|--|--|--|--|--|--|--|--|--|--|--|--|--|--|--|--|--|--|--|--|--|--|--|--|--|--|--|--|--|--|--|--|--|--|--|--|--|--|--|--|--|--|--|--|--|--|--|--|--|--|--|--|--|--|--|--|--|--|--|--|--|--|--|--|--|--|--|--|--|--|--|--|--|--|--|--|--|--|--|--|--|--|--|--|--|--|--|--|--|--|--|--|--|--|--|--|--|--|--|--|--|--|--|--|--|--|--|--|--|--|--|--|--|--|--|--|--|--|--|--|--|--|--|--|--|--|--|--|--|--|--|--|--|--|--|--|--|--|--|--|--|--|--|--|--|--|--|--|--|--|--|--|--|--|--|--|--|--|--|--|--|--|--|--|--|--|--|--|--|--|--|--|--|--|--|--|--|--|--|--|--|--|--|--|--|--|--|--|--|--|--|--|--|--|--|--|--|--|--|--|--|--|--|--|--|--|--|--|--|--|--|--|--|--|--|--|--|--|--|--|--|--|--|--|--|--|--|--|--|--|--|--|--|--|--|--|--|--|--|--|--|--|--|--|--|--|--|--|--|--|--|--|--|--|--|--|--|--|--|--|--|--|--|--|--|--|--|--|--|--|--|--|--|--|--|--|--|--|--|--|--|--|--|--|--|--|--|--|--|--|--|--|--|--|--|--|--|--|--|--|--|--|--|--|--|--|--|--|--|--|--|--|--|--|--|--|--|--|--|--|--|--|--|--|--|--|--|--|--|--|--|--|--|--|--|--|--|--|--|--|--|--|--|--|--|--|--|--|--|--|--|--|--|--|--|--|--|--|--|--|--|--|--|--|--|--|--|--|--|--|--|--|--|--|--|--|--|--|--|--|--|--|--|--|--|--|--|--|--|--|--|--|--|--|--|--|--|--|--|--|--|--|--|--|--|--|--|--|--|--|--|--|--|--|--|--|--|--|--|--|--|--|--|--|--|--|--|--|--|--|--|--|--|--|--|--|--|--|--|--|--|--|--|--|--|--|--|--|--|--|--|--|--|--|--|--|--|--|--|--|--|--|--|--|--|--|--|--|--|--|--|--|--|--|--|--|--|--|--|--|--|--|--|--|--|--|--|--|--|--|--|--|--|--|--|--|--|--|--|--|--|--|--|--|--|--|--|--|--|--|--|--|--|--|--|--|--|--|--|--|--|--|--|--|--|--|--|--|--|--|--|--|--|--|--|--|--|--|--|--|--|--|--|--|--|--|--|--|--|--|--|--|--|--|--|--|--|--|--|--|--|--|--|--|--|--|--|--|--|--|--|--|--|--|--|--|--|--|--|--|--|--|--|--|--|--|--|--|--|--|--|--|--|--|--|--|--|--|--|--|--|--|--|--|--|--|--|--|--|--|--|--|--|--|--|--|--|--|--|--|--|--|--|--|--|--|--|--|--|--|--|--|--|--|--|--|--|--|--|--|--|--|--|--|--|--|--|--|--|--|--|--|--|--|--|--|--|--|--|--|--|--|--|--|--|--|--|--|--|--|--|--|--|--|--|--|--|--|--|--|--|--|--|--|--|--|--|--|--|--|--|--|--|--|--|--|--|--|--|--|--|--|--|--|--|--|--|--|--|--|--|--|--|--|--|--|--|--|--|--|--|--|--|--|--|--|--|--|--|--|--|--|--|--|--|--|--|--|--|--|--|--|--|--|--|--|--|--|--|--|--|--|--|--|--|--|--|--|--|--|--|--|--|--|--|--|--|--|--|--|--|--|--|--|--|--|--|--|--|--|
|  |  |  |  |  |  |  |  |  |  |  |  |  |  |  |  |  |  |  |  |  |  |  |  |  |  |  |  |  |  |  |  |  |  |  |  |  |  |  |  |  |  |  |  |  |  |  |  |  |  |  |  |  |  |  |  |  |  |  |  |  |  |  |  |  |  |  |  |  |  |  |  |  |  |  |  |  |  |  |  |  |  |  |  |  |  |  |  |  |  |  |  |  |  |  |  |  |  |  |  |  |  |  |  |  |  |  |  |  |  |  |  |  |  |  |  |  |  |  |  |  |  |  |  |  |  |  |  |  |  |  |  |  |  |  |  |  |  |  |  |  |  |  |  |  |  |  |  |  |  |  |  |  |  |  |  |  |  |  |  |  |  |  |  |  |  |  |  |  |  |  |  |  |  |  |  |  |  |  |  |  |  |  |  |  |  |  |  |  |  |  |  |  |  |  |  |  |  |  |  |  |  |  |  |  |  |  |  |  |  |  |  |  |  |  |  |  |  |  |  |  |  |  |  |  |  |  |  |  |  |  |  |  |  |  |  |  |  |  |  |  |  |  |  |  |  |  |  |  |  |  |  |  |  |  |  |  |  |  |  |  |  |  |  |  |  |  |  |  |  |  |  |  |  |  |  |  |  |  |  |  |  |  |  |  |  |  |  |  |  |  |  |  |  |  |  |  |  |  |  |  |  |  |  |  |  |  |  |  |  |  |  |  |  |  |  |  |  |  |  |  |  |  |  |  |  |  |  |  |  |  |  |  |  |  |  |  |  |  |  |  |  |  |  |  |  |  |  |  |  |  |  |  |  |  |  |  |  |  |  |  |  |  |  |  |  |  |  |  |  |  |  |  |  |  |  |  |  |  |  |  |  |  |  |  |  |  |  |  |  |  |  |  |  |  |  |  |  |  |  |  |  |  |  |  |  |  |  |  |  |  |  |  |  |  |  |  |  |  |  |  |  |  |  |  |  |  |  |  |  |  |  |  |  |  |  |  |  |  |  |  |  |  |  |  |  |  |  |  |  |  |  |  |  |  |  |  |  |  |  |  |  |  |  |  |  |  |  |  |  |  |  |  |  |  |  |  |  |  |  |  |  |  |  |  |  |  |  |  |  |  |  |  |  |  |  |  |  |  |  |  |  |  |  |  |  |  |  |  |  |  |  |  |  |  |  |  |  |  |  |  |  |  |  |  |  |  |  |  |  |  |  |  |  |  |  |  |  |  |  |  |  |  |  |  |  |  |  |  |  |  |  |  |  |  |  |  |  |  |  |  |  |  |  |  |  |  |  |  |  |  |  |  |  |  |  |  |  |  |  |  |  |  |  |  |  |  |  |  |  |  |  |  |  |  |  |  |  |  |  |  |  |  |  |  |  |  |  |  |  |  |  |  |  |  |  |  |  |  |  |  |  |  |  |  |  |  |  |  |  |  |  |  |  |  |  |  |  |  |  |  |  |  |  |  |  |  |  |  |  |  |  |  |  |  |  |  |  |  |  |  |  |  |  |  |  |  |  |  |  |  |  |  |  |  |  |  |  |  |  |  |  |  |  |  |  |  |  |  |  |  |  |  |  |  |  |  |  |  |  |  |  |  |  |  |  |  |  |  |  |  |  |  |  |  |  |  |  |  |  |  |  |  |  |  |  |  |  |  |  |  |  |  |  |  |  |  |  |  |  |  |  |  |  |  |  |  |  |  |  |  |  |  |  |  |  |  |  |  |  |  |  |  |  |  |  |  |  |  |  |  |  |  |  |  |  |  |  |  |  |  |  |  |  |  |  |  |  |  |  |  |  |  |  |  |  |  |  |  |  |  |  |  |  |  |  |  |  |  |  |  |  |  |  |  |  |  |  |  |  |  |  |  |  |  |  |  |  |  |  |  |  |  |  |  |  |  |  |  |  |  |  |  |  |  |  |  |  |  |  |  |  |  |  |  |  |  |  |  |  |  |  |  |  |  |  |  |  |  |  |  |  |  |  |  |  |  |  |  |  |  |  |  |  |  |  |  |  |  |  |  |  |  |  |  |  |  |  |  |  |  |  |  |  |  |  |  |  |  |  |  |  |  |  |  |  |  |  |  |  |  |  |  |  |  |  |  |  |  |  |  |  |  |  |  |  |  |  |  |  |  |  |  |  |  |  |  |  |  |  |  |  |  |  |  |  |  |  |  |  |  |  |  |  |  |  |  |  |  |  |  |  |  |  |  |  |  |  |  |  |  |  |  |  |  |  |  |  |  |  |  |  |  |  |  |  |  |  |  |  |  |  |  |  |  |  |  |  |  |  |  |  |  |  |  |  |  |  |  |  |  |  |  |  |  |  |  |  |  |  |  |  |  |  |  |  |  |  |  |  |  |  |  |  |  |  |  |  |  |  |  |  |  |  |  |  |  |  |  |  |  |  |  |  |  |  |  |  |  |  |  |  |  |  |  |  |  |  |  |  |  |  |  |  |  |  |  |  |  |  |  |  |  |  |  |  |  |  |  |  |  |  |  |  |  |  |  |  |  |  |  |  |  |  |  |  |  |  |  |  |  |  |  |  |  |  |  |  |  |  |  |  |  |  |  |  |  |  |  |  |  |  |  |  |  |  |  |  |  |  |  |  |  |  |  |  |  |  |  |  |  |  |  |  |  |  |  |  |  |  |  |  |  |  |  |  |  |  |  |  |  |  |  |  |  |  |  |  |  |  |  |  |  |  |  |  |  |  |  |  |  |  |  |  |  |  |  |  |  |  |  |  |  |  |  |  |  |  |  |  |  |  |  |  |  |  |  |  |  |  |  |  |  |  |  |  |  |  |  |  |  |  |  |  |  |  |  |  |  |  |  |  |  |  |  |  |  |  |  |  |  |  |  |  |  |  |  |  |  |  |  |  |  |  |  |  |  |  |  |  |  |  |  |  |  |  |  |  |  |  |  |  |  |  |  |  |  |  |  |  |  |  |  |  |  |  |  |  |  |  |  |  |  |  |  |  |  |  |  |  |  |  |  |  |  |  |  |  |  |  |  |  |  |  |  |  |  |  |  |  |  |  |  |  |  |  |  |  |  |  |  |  |  |  |  |  |  |  |  |  |  |  |  |  |  |  |  |  |  |  |  |  |  |  |  |  |  |  |  |  |  |  |  |  |  |  |  |  |  |  |  |  |  |  |  |  |  |  |  |  |  |  |  |  |  |  |  |  |  |  |  |  |  |  |  |  |  |  |  |  |  |  |  |  |  |  |  |  |  |  |  |  |  |  |  |  |  |  |  |  |  |  |  |  |  |  |  |  |  |  |  |  |  |  |  |  |  |  |  |  |  |  |  |  |  |  |  |  |  |  |  |  |  |  |  |  |  |  |  |  |  |  |  |  |  |  |  |  |  |  |  |  |  |
|--|--|--|--|--|--|--|--|--|--|--|--|--|--|--|--|--|--|--|--|--|--|--|--|--|--|--|--|--|--|--|--|--|--|--|--|--|--|--|--|--|--|--|--|--|--|--|--|--|--|--|--|--|--|--|--|--|--|--|--|--|--|--|--|--|--|--|--|--|--|--|--|--|--|--|--|--|--|--|--|--|--|--|--|--|--|--|--|--|--|--|--|--|--|--|--|--|--|--|--|--|--|--|--|--|--|--|--|--|--|--|--|--|--|--|--|--|--|--|--|--|--|--|--|--|--|--|--|--|--|--|--|--|--|--|--|--|--|--|--|--|--|--|--|--|--|--|--|--|--|--|--|--|--|--|--|--|--|--|--|--|--|--|--|--|--|--|--|--|--|--|--|--|--|--|--|--|--|--|--|--|--|--|--|--|--|--|--|--|--|--|--|--|--|--|--|--|--|--|--|--|--|--|--|--|--|--|--|--|--|--|--|--|--|--|--|--|--|--|--|--|--|--|--|--|--|--|--|--|--|--|--|--|--|--|--|--|--|--|--|--|--|--|--|--|--|--|--|--|--|--|--|--|--|--|--|--|--|--|--|--|--|--|--|--|--|--|--|--|--|--|--|--|--|--|--|--|--|--|--|--|--|--|--|--|--|--|--|--|--|--|--|--|--|--|--|--|--|--|--|--|--|--|--|--|--|--|--|--|--|--|--|--|--|--|--|--|--|--|--|--|--|--|--|--|--|--|--|--|--|--|--|--|--|--|--|--|--|--|--|--|--|--|--|--|--|--|--|--|--|--|--|--|--|--|--|--|--|--|--|--|--|--|--|--|--|--|--|--|--|--|--|--|--|--|--|--|--|--|--|--|--|--|--|--|--|--|--|--|--|--|--|--|--|--|--|--|--|--|--|--|--|--|--|--|--|--|--|--|--|--|--|--|--|--|--|--|--|--|--|--|--|--|--|--|--|--|--|--|--|--|--|--|--|--|--|--|--|--|--|--|--|--|--|--|--|--|--|--|--|--|--|--|--|--|--|--|--|--|--|--|--|--|--|--|--|--|--|--|--|--|--|--|--|--|--|--|--|--|--|--|--|--|--|--|--|--|--|--|--|--|--|--|--|--|--|--|--|--|--|--|--|--|--|--|--|--|--|--|--|--|--|--|--|--|--|--|--|--|--|--|--|--|--|--|--|--|--|--|--|--|--|--|--|--|--|--|--|--|--|--|--|--|--|--|--|--|--|--|--|--|--|--|--|--|--|--|--|--|--|--|--|--|--|--|--|--|--|--|--|--|--|--|--|--|--|--|--|--|--|--|--|--|--|--|--|--|--|--|--|--|--|--|--|--|--|--|--|--|--|--|--|--|--|--|--|--|--|--|--|--|--|--|--|--|--|--|--|--|--|--|--|--|--|--|--|--|--|--|--|--|--|--|--|--|--|--|--|--|--|--|--|--|--|--|--|--|--|--|--|--|--|--|--|--|--|--|--|--|--|--|--|--|--|--|--|--|--|--|--|--|--|--|--|--|--|--|--|--|--|--|--|--|--|--|--|--|--|--|--|--|--|--|--|--|--|--|--|--|--|--|--|--|--|--|--|--|--|--|--|--|--|--|--|--|--|--|--|--|--|--|--|--|--|--|--|--|--|--|--|--|--|--|--|--|--|--|--|--|--|--|--|--|--|--|--|--|--|--|--|--|--|--|--|--|--|--|--|--|--|--|--|--|--|--|--|--|--|--|--|--|--|--|--|--|--|--|--|--|--|--|--|--|--|--|--|--|--|--|--|--|--|--|--|--|--|--|--|--|--|--|--|--|--|--|--|--|--|--|--|--|--|--|--|--|--|--|--|--|--|--|--|--|--|--|--|--|--|--|--|--|--|--|--|--|--|--|--|--|--|--|--|--|--|--|--|--|--|--|--|--|--|--|--|--|--|--|--|--|--|--|--|--|--|--|--|--|--|--|--|--|--|--|--|--|--|--|--|--|--|--|--|--|--|--|--|--|--|--|--|--|--|--|--|--|--|--|--|--|--|--|--|--|--|--|--|--|--|--|--|--|--|--|--|--|--|--|--|--|--|--|--|--|--|--|--|--|--|--|--|--|--|--|--|--|--|--|--|--|--|--|--|--|--|--|--|--|--|--|--|--|--|--|--|--|--|--|--|--|--|--|--|--|--|--|--|--|--|--|--|--|--|--|--|--|--|--|--|--|--|--|--|--|--|--|--|--|--|--|--|--|--|--|--|--|--|--|--|--|--|--|--|--|--|--|--|--|--|--|--|--|--|--|--|--|--|--|--|--|--|--|--|--|--|--|--|--|--|--|--|--|--|--|--|--|--|--|--|--|--|--|--|--|--|--|--|--|--|--|--|--|--|--|--|--|--|--|--|--|--|--|--|--|--|--|--|--|--|--|--|--|--|--|--|--|--|--|--|--|--|--|--|--|--|--|--|--|--|--|--|--|--|--|--|--|--|--|--|--|--|--|--|--|--|--|--|--|--|--|--|--|--|--|--|--|--|--|--|--|--|--|--|--|--|--|--|--|--|--|--|--|--|--|--|--|--|--|--|--|--|--|--|--|--|--|--|--|--|--|--|--|--|--|--|--|--|--|--|--|--|--|--|--|--|--|--|--|--|--|--|--|--|--|--|--|--|--|--|--|--|--|--|--|--|--|--|--|--|--|--|--|--|--|--|--|--|--|--|--|--|--|--|--|--|--|--|--|--|--|--|--|--|--|--|--|--|--|--|--|--|--|--|--|--|--|--|--|--|--|--|--|--|--|--|--|--|--|--|--|--|--|--|--|--|--|--|--|--|--|--|--|--|--|--|--|--|--|--|--|--|--|--|--|--|--|--|--|--|--|--|--|--|--|--|--|--|--|--|--|--|--|--|--|--|--|--|--|--|--|--|--|--|--|--|--|--|--|--|--|--|--|--|--|--|--|--|--|--|--|--|--|--|--|--|--|--|--|--|--|--|--|--|--|--|--|--|--|--|--|--|--|--|--|--|--|--|--|--|--|--|--|--|--|--|--|--|--|--|--|--|--|--|--|--|--|--|--|--|--|--|--|--|--|--|--|--|--|--|--|--|--|--|--|--|--|--|--|--|--|--|--|--|--|--|--|--|--|--|--|--|--|--|--|--|--|--|--|--|--|--|--|--|--|--|--|--|--|--|--|--|--|--|--|--|--|--|--|--|--|--|--|--|--|--|--|--|--|--|--|--|--|--|--|--|--|--|--|--|--|--|--|--|--|--|--|--|--|--|--|--|--|--|--|--|--|--|--|--|--|--|--|--|--|--|--|--|--|--|--|--|--|--|--|--|--|--|--|--|--|--|--|--|--|--|--|--|--|--|--|--|--|--|--|



|               |             |            |             |             |             |             |             |            |            |     |  |  |     |  |  |  |  |     |  |
|---------------|-------------|------------|-------------|-------------|-------------|-------------|-------------|------------|------------|-----|--|--|-----|--|--|--|--|-----|--|
|               |             |            |             | 580         |             |             |             | 600        |            |     |  |  | 620 |  |  |  |  | 640 |  |
| SpNADH-GOGAT  | CLEDVLSVSP  | ETDRLSPPI  | S           | GVVQADSHDD  | SMENVGVRL   | LQPLKAFGYT  | VEALEMLLP   | MVKDATEALG | SMGNDTPLAV | 633 |  |  |     |  |  |  |  |     |  |
| AINADH-GOGAT  | ELKDIIESVP  | EAEIRAPSI  | S           | GVVPAASND   | SMESMGIHGL  | LSPLKAFGYT  | VEALEMLLP   | MAKDGEALG  | SMGNDTPLAV | 630 |  |  |     |  |  |  |  |     |  |
| NnNADH-GOGAT1 | ELKDIVDSVH  | EADRVPPAIS | S           | GSVPASSHDD  | NMENMGIHGL  | VAPLKAFGYT  | VEALEMLLP   | MAKDGEALG  | SMGNDTPLAV | 625 |  |  |     |  |  |  |  |     |  |
| NnNADH-GOGAT2 | ELKDIVSVH   | ESDRVPPAIS | S           | GAVPASSHDD  | NMENMGIHGL  | LAPLKSFGYT  | VEALEMLLP   | MAKDGEALG  | SMGNDTPLAV | 625 |  |  |     |  |  |  |  |     |  |
| OsNADH-GOGAT1 | YLKDIIVESVP | ETERVAPGIS | S           | GSLTQKN--E  | KKEHAGVNGI  | VTPLKAFGYT  | VEALEMLLP   | MAKDGEALG  | SMGNDTPLAV | 611 |  |  |     |  |  |  |  |     |  |
| SbNADH-GOGAT1 | HLKDIIVESVP | ETDRVAPIS  | S           | SSLPQKN--E  | NKDDVGVNGI  | LTPLKAFGYT  | VEALEMLLP   | MAKDGEALG  | SMGNDTPLAV | 607 |  |  |     |  |  |  |  |     |  |
| BdNADH-GOGAT1 | YLKDIIVESVP | ETDRVAPIS  | A           | GSIPQMN--D  | NKECKGVNGI  | VTPLKAFGYT  | VEALEMLLP   | MAKDGEALG  | SMGNDAPLAV | 607 |  |  |     |  |  |  |  |     |  |
| OsNADH-GOGAT2 | QLTDIIIESVN | EAEIRAPSI  | S           | GALPI TK--E | NKADMGICGI  | LTPLKAFGYT  | REALEMLLP   | MAKDGEALG  | SMGNDTPLAV | 618 |  |  |     |  |  |  |  |     |  |
| SbNADH-GOGAT2 | QLADIIIESVP | ETERGAPRID | S           | -MLPQKN--E  | NKEAFCIHGI  | LAPLKAFGYT  | VTETLEMLLP  | MAKNGVEALG | SMGNDTPLAV | 628 |  |  |     |  |  |  |  |     |  |
| BdNADH-GOGAT2 | ELRDIIESVS  | ATERIAPMIS | S           | GAL-----    | -REPVGVNGI  | LAPLKAFGYT  | LETLDMLLP   | MAKDGEALG  | SMGNDTPLAV | 611 |  |  |     |  |  |  |  |     |  |
| Consensus     | ELKDIIVESVP | ETXRVAPIS  | S           | GSLPXXN--E  | NKENMGI XGI | LXPLKAFGYT  | VEALEMLLP   | MAKDGEALG  | SMGNDTPLAV |     |  |  |     |  |  |  |  |     |  |
|               |             |            |             | 660         |             |             |             |            |            |     |  |  |     |  |  |  |  |     |  |
| SpNADH-GOGAT  | MSDRAKIPSE  | YFKQMFQVNT | NPPIDPIREK  | IVTSMCEMIG  | PEGDLTETTE  | EQCHRLALKG  | PLLSIGEMEA  | IKKMNFGQWR | 710        |     |  |  |     |  |  |  |  |     |  |
| AINADH-GOGAT  | MSNREKLCFE  | YFKQMFQVNT | NPPIDPIREK  | IVTSMCEMIG  | PEGDLTETTE  | EQCHRLSLKG  | PLLLIEEMEA  | IKKMNVRGWR | 710        |     |  |  |     |  |  |  |  |     |  |
| NnNADH-GOGAT1 | MSNREKLTFE  | YFKQMFQVNT | NPPIDPIREK  | IVTSMCEMIG  | PEGDLTETTE  | QQCHRLSLKG  | PLLSIEEMEA  | IKKMNVRGWR | 705        |     |  |  |     |  |  |  |  |     |  |
| NnNADH-GOGAT2 | MSNREKLTFE  | YFKQMFQVNT | NPPIDPIREK  | IVTSMCEMIG  | PEGDLTETTE  | EQCHRLSLKG  | PLLSMDEMEA  | IKKMNVRGWR | 705        |     |  |  |     |  |  |  |  |     |  |
| OsNADH-GOGAT1 | MSNREKLTFE  | YFKQMFQVNT | NPPIDPIREK  | IVTSMCEMIG  | PEGDLTETTE  | KQCNRALLEG  | PLVSIDEMEA  | IKKMNVRGWR | 691        |     |  |  |     |  |  |  |  |     |  |
| SbNADH-GOGAT1 | MSNREKLTFE  | YFKQMFQVNT | NPPIDPIREK  | IVTSMCEMIG  | PEGDLTETTE  | KQCNRALLEG  | PLVSIDEMEA  | IKKMDVRGWR | 687        |     |  |  |     |  |  |  |  |     |  |
| BdNADH-GOGAT1 | MSNREKLTFE  | YFKQMFQVNT | NPPIDPIREK  | IVTSMCEMIG  | PEGDLLEITE  | KQCNRALIKG  | PLVSIDEMEA  | IKKMDVRGWR | 687        |     |  |  |     |  |  |  |  |     |  |
| OsNADH-GOGAT2 | MSNREKLTFE  | YFKQMFQVNT | NPPIDPIREK  | IVTSMCEMIG  | PEGDLSETTE  | RQCNRLLTKS  | PLLNTNEMEA  | IKKMNVRGWR | 698        |     |  |  |     |  |  |  |  |     |  |
| SbNADH-GOGAT2 | MSNREKMPFD  | YFKQMFQVNT | NPPIDPIREK  | IVTSMCEMIG  | PEGDLSETTE  | HQCNRLLKLG  | PLLIIDEMEA  | IKKMNVRGWR | 708        |     |  |  |     |  |  |  |  |     |  |
| BdNADH-GOGAT2 | MSNREKLTAE  | YFKQMFQVNT | NPPIDPIREK  | IVTSMCEMIG  | PEGDLSETTE  | RQCNRLLTKS  | PLLIIDEMEA  | IKKMNVRGWR | 691        |     |  |  |     |  |  |  |  |     |  |
| Consensus     | MSNREKLTFE  | YFKQMFQVNT | NPPIDPIREK  | IVTSMCEMIG  | PEGDLTETTE  | EQCHRLALKG  | PLLSIDEMEA  | IKKMNVRGWR |            |     |  |  |     |  |  |  |  |     |  |
|               |             |            |             | 740         |             |             |             |            |            |     |  |  |     |  |  |  |  |     |  |
| SpNADH-GOGAT  | SKVLDITYSK  | NRGRKGLEET | LDRICSEARA  | AIREGYTLLV  | LSDRGFSSER  | VGVSLLAVG   | AVHQHLSVKL  | ERTRIGLIVE | 793        |     |  |  |     |  |  |  |  |     |  |
| AINADH-GOGAT  | TKVLDITYAK  | ERGTRKLEET | LDRICSEANE  | AIKEGYTLLV  | LSDRAFSPNR  | VAVSSLLAVG  | AVHHHLVKLT  | ARTQVGLVVE | 790        |     |  |  |     |  |  |  |  |     |  |
| NnNADH-GOGAT1 | SKVLDITYLK  | SGRGRKLEEM | LDRICSEAEH  | AIKEGTILLV  | LSDRAFSPNR  | VAVSSLLAVG  | AVHHHLVKEL  | ERTRIGLIVE | 785        |     |  |  |     |  |  |  |  |     |  |
| NnNADH-GOGAT2 | SKVLDITYPK  | SRGMKGLEET | LDRICSEARD  | ALKEGYTLLV  | LSDRAFSPNR  | VAVSSLLAVG  | AVHHHLVKL   | ERTRIGLIVE | 785        |     |  |  |     |  |  |  |  |     |  |
| OsNADH-GOGAT1 | SKVLDITYPK  | KSGRKGLEET | LDRICTEARG  | AIKKGTYTLV  | LSDRGFSSDR  | VAVSSLLAVG  | AVHQHLSVANL | ERTRVGLLVE | 771        |     |  |  |     |  |  |  |  |     |  |
| SbNADH-GOGAT1 | SKVLDITYPK  | KSGRKGLEEA | LDRICAEARE  | AISKGYTILLV | LSDRGFSSDR  | VAVSSLLAVG  | AVHQHLSVANH | ERTRIGLIVE | 767        |     |  |  |     |  |  |  |  |     |  |
| BdNADH-GOGAT1 | SKVLDITYPK  | KSGRKGLEET | LDRICAEARE  | AIRNGYKILV  | LSDRGFSSDR  | VAVSSLLAVG  | AVHQHLSVANL | ERTRVGLLVE | 767        |     |  |  |     |  |  |  |  |     |  |
| OsNADH-GOGAT2 | SKVLDITYPK  | KNGRMGLQET | LDKICAQARE  | AIHEGYTILLV | LSDRGFSSER  | VAVSSLLAVG  | AVHQHLSVSHL | ERTRIGLIVE | 778        |     |  |  |     |  |  |  |  |     |  |
| SbNADH-GOGAT2 | SKVLDITYPK  | VYGRKGLEQT | LDKLCAQARE  | AIHGYTILLI  | LSDRGFSPDR  | VPVSSLLAVG  | AVHQHLSVNL  | DRTRIGLLVD | 788        |     |  |  |     |  |  |  |  |     |  |
| BdNADH-GOGAT2 | SKVLDITYPK  | KYGRKGLEQT | LDKVCAQARE  | AIQEGYKILV  | ISDRGFSPDH  | VAVSSLLAVG  | AVHQHLSVNH  | ERTHVGLLVE | 771        |     |  |  |     |  |  |  |  |     |  |
| Consensus     | SKVLDITYPK  | KRGRKGLEET | LDRICAEARE  | AIKEGYTILLV | LSDRGFSSDR  | VAVSSLLAVG  | AVHQHLSVNL  | ERTRIGLIVE |            |     |  |  |     |  |  |  |  |     |  |
|               |             |            |             | 820         |             |             |             |            |            |     |  |  |     |  |  |  |  |     |  |
| SpNADH-GOGAT  | SAEPREVHNF  | CTLVGYGADA | ICPYLAIEAI  | WRLQIDGKIP  | PKASGELHSR  | DELVORYFKA  | SNDGMMKVLA  | KMGISTLAS  | 873        |     |  |  |     |  |  |  |  |     |  |
| AINADH-GOGAT  | SAEPREVHNF  | CTLVGFGADA | ICPYLAVEAV  | YRLQVDGKIP  | PKSNGEFHSK  | EELVKKYFKA  | SNYGMKVLA   | KMGISTLAS  | 870        |     |  |  |     |  |  |  |  |     |  |
| NnNADH-GOGAT1 | SAEPREVHNF  | CTLVGFGADA | ICPYLAIEAI  | WRLQIDGKIP  | PKASGELHSR  | EELVKKYFKA  | SNYGMKVLA   | KMGISTLAS  | 865        |     |  |  |     |  |  |  |  |     |  |
| NnNADH-GOGAT2 | SAEPREVHNF  | CTLVGYGADA | ICPYLAIEAI  | WRLQVDGKIP  | PKASGEFHSK  | EELVKKYFKA  | STYGMKVLA   | KMGISTLAS  | 865        |     |  |  |     |  |  |  |  |     |  |
| OsNADH-GOGAT1 | SAEPREVHNF  | CTLVGFGADA | VCPYLAIEAI  | WCLQNDGKIP  | PNGDGKPYSK  | EELVKKYFYA  | SNYGMKVLA   | KMGISTLAS  | 851        |     |  |  |     |  |  |  |  |     |  |
| SbNADH-GOGAT1 | SAEPREVHNF  | CTLVGFGADA | ICPYLAIEAI  | WCLQNDGKIP  | PNGDGQLYSK  | EELVKKYFYA  | SNYGMKVLA   | KMGISTLAS  | 847        |     |  |  |     |  |  |  |  |     |  |
| BdNADH-GOGAT1 | SAEPREVHNF  | CTLVGFGADA | ICPYLAIEAI  | WCLQIDGKIP  | PNGDGQPDSC  | EELVKKYFYA  | SIYGMKVLA   | KMGISTLAS  | 847        |     |  |  |     |  |  |  |  |     |  |
| OsNADH-GOGAT2 | SAEPREVHNF  | STLIGFGADA | ICPYLAIEAI  | WRLQIDGRIP  | P-NDGKPYTQ  | EQLIEKYFYA  | SNYGMKVLA   | KMGISTLAS  | 857        |     |  |  |     |  |  |  |  |     |  |
| SbNADH-GOGAT2 | SAEPREVHNF  | CTLLGFGADA | ICPYLAIEAI  | WRLQIDEXIP  | PKDDGQLYPK  | E-LIDKYFYA  | SNNGIMKVLA  | KMGISTLAS  | 867        |     |  |  |     |  |  |  |  |     |  |
| BdNADH-GOGAT2 | SAEPHEVHNF  | CTLIGYGADA | ICPYLAIEVI  | CRLQIDGRIP  | CTDGEQYTTQ  | EQXLAQKYFNA | SNYGMKVLA   | KMGISTLAS  | 851        |     |  |  |     |  |  |  |  |     |  |
| Consensus     | SAEPREVHNF  | CTLVGFGADA | ICPYLAIEAI  | WRLQIDGKIP  | PKXDGXPYSK  | EELVKKYFYA  | SNYGMKVLA   | KMGISTLAS  |            |     |  |  |     |  |  |  |  |     |  |
|               |             |            |             | 900         |             |             |             |            |            |     |  |  |     |  |  |  |  |     |  |
| SpNADH-GOGAT  | KGAQIFEALG  | LSSEVIKCF  | NGTPSRVEGA  | NFEILARDAL  | RLHESAFPSR  | ALPPGSAEAV  | ALPNPGDYHW  | RKGGEVHLND | 953        |     |  |  |     |  |  |  |  |     |  |
| AINADH-GOGAT  | KGAQIFEALG  | LSSEVIKCF  | AGTPSRVEGA  | TFEMLARDGL  | QLHELAFPT   | GYAPGSAEAS  | ALTNPNGYHW  | RKNGEIHLND | 950        |     |  |  |     |  |  |  |  |     |  |
| NnNADH-GOGAT1 | KGAQIFEALG  | LSSEVIKCF  | AGTPSRVEGA  | TFEMLARDAL  | RLHESAFPT   | ALPPGSAEAV  | ALPNPGDYHW  | RKGGEIHLND | 945        |     |  |  |     |  |  |  |  |     |  |
| NnNADH-GOGAT2 | KGAQIFEALG  | LSSEVIKCF  | KGTSPSRVEGA | TFEMLALDAL  | QLHEMAFPTR  | AMPPGSAEAV  | ALPNPGDYHW  | RKGGEIHLND | 945        |     |  |  |     |  |  |  |  |     |  |
| OsNADH-GOGAT1 | KGAQIFEALG  | LSSEVIKCF  | DGTSPRIEGA  | TFEMLARDAL  | RLHELAFPSR  | APPPGSAEAD  | ALPNPGDYHW  | RKNGEVHLND | 931        |     |  |  |     |  |  |  |  |     |  |
| SbNADH-GOGAT1 | KGAQIFEALG  | LSSEVIKCF  | EGTPSRIEGA  | TFEMLARDAL  | RLHELAFPSR  | TPPAGSADAK  | ALPNPGDYHW  | RKNGEIHLND | 927        |     |  |  |     |  |  |  |  |     |  |
| BdNADH-GOGAT1 | KGAQIFEALG  | LSSEVIKCF  | EGTPSRIEGA  | TFEMLARDAL  | RLHELAFPSR  | LPPAGSADAK  | ALPNPGDYHW  | RKNGEIHLND | 927        |     |  |  |     |  |  |  |  |     |  |
| OsNADH-GOGAT2 | KGAQIFEALG  | LASEVVSCKF | EGTPSRVEGA  | TFEMLAQDAL  | RLHEIAFPSS  | TLPPGSAEAD  | ALPNPGDYHW  | RKNGEVHLND | 937        |     |  |  |     |  |  |  |  |     |  |
| SbNADH-GOGAT2 | KGAQIFEALG  | LASEVVSCKF | EGTPSRVEGS  | TFEMLAQDAL  | HLLKLAFPSR  | TLPPGSAEAD  | SLPNPGDHHW  | RKNGEVHLND | 947        |     |  |  |     |  |  |  |  |     |  |
| BdNADH-GOGAT2 | KGAQIFEALG  | LASEVIKCF  | EGTPSKVEGA  | KFDMLANDAL  | RLHDLAFPSR  | SWPHGSAEAD  | ALPNPGDYHW  | RKNGEVHLND | 931        |     |  |  |     |  |  |  |  |     |  |
| Consensus     | KGAQIFEALG  | LSSEVIKCF  | EGTPSRVEGA  | TFEMLARDAL  | RLHELAFPSR  | ALPPGSAEAX  | ALPNPGDYHW  | RKNGEIHLND |            |     |  |  |     |  |  |  |  |     |  |
|               |             |            |             | 980         |             |             |             |            |            |     |  |  |     |  |  |  |  |     |  |
| SpNADH-GOGAT  | PLAIAKLQEA  | ARANSVAAYK | EYSRRVQELN  | KECNLRGMLK  | FKDVPKINL   | DEVEPASEIV  | KRFCTGAMS   | GSISLEAHTT | 103        |     |  |  |     |  |  |  |  |     |  |
| AINADH-GOGAT  | PLAIAKLQEA  | ARTNSVAAYK | EYSKRINELN  | KQSNLRGLMK  | FKDADVKIPL  | DEVEPASEIV  | KRFCTGAMS   | GSISLEAHTT | 103        |     |  |  |     |  |  |  |  |     |  |
| NnNADH-GOGAT1 | PLAMAKLQEA  | ARNSVAAYR  | EYSKRINELN  | KQSNLRGLMK  | FKEAKGVPL   | DEVEPASEIV  | KRFCTGAMS   | GSISLEAHTT | 102        |     |  |  |     |  |  |  |  |     |  |
| NnNADH-GOGAT2 | PLAIAKLQEA  | ARNSVAAYR  | EYSKRINELN  | KQSNLRGLMK  | FKEAEVKVPL  | DEVEPASEIV  | KRFCTGAMS   | GSISLEAHTT | 102        |     |  |  |     |  |  |  |  |     |  |
| OsNADH-GOGAT1 | PLAMAKLQEA  | ARVNSRAAYK | EYSRRVQELN  | KTCNLRGLMK  | FKDADIMSV   | DEVEPASEIV  | KRFVTGAMS   | GSISLEAHTT | 101        |     |  |  |     |  |  |  |  |     |  |
| SbNADH-GOGAT1 | PLAMGKLQEA  | ARVNSRAAYK | EYSKRINELN  | KACNLRGLMK  | FKDISDKISL  | DEVEPASEIV  | KRFCTGAMS   | GSISLEAHTT | 100        |     |  |  |     |  |  |  |  |     |  |
| BdNADH-GOGAT1 | PLAMAKLQEA  | AKVNSRAAYK | EYSKRINELN  | KACNLRGLMK  | FKDISNKISL  | DEVEPASEIV  | KRFCTGAMS   | GSISLEAHTT | 100        |     |  |  |     |  |  |  |  |     |  |
| OsNADH-GOGAT2 | PFSIAKLQEA  | ARINSREAYK | EYSRRVQELN  | KACTLRGLMK  | FREIPNOISL  | DEVEPASEIV  | KRFCTGAMS   | GSISLEAHTT | 101        |     |  |  |     |  |  |  |  |     |  |
| SbNADH-GOGAT2 | PFSIAKLQEA  | ARLDSREAYK | EYSRRTEELS  | KQCTLRGLMK  | FREIPVIRISL | DEVEPASEIV  | KRFCTGAMS   | GSISLEAHTT | 102        |     |  |  |     |  |  |  |  |     |  |
| BdNADH-GOGAT2 | PLSIAKLQEA  | ARINSKEAYK | EYSRLIQDNN  | KACTLRGLMK  | FRETDRIRISL | DEVEPASEIM  | KRFCTGAMS   | GSISLEAHTT | 101        |     |  |  |     |  |  |  |  |     |  |
| Consensus     | PLAIAKLQEA  | ARVNSRAAYK | EYSXRIQELN  | KACNLRGLMK  | FKXIPVKISL  | DEVEPASEIV  | KRFCTGAMS   | GSISLEAHTT |            |     |  |  |     |  |  |  |  |     |  |
|               |             |            |             | 1,060       |             |             |             |            |            |     |  |  |     |  |  |  |  |     |  |
| SpNADH-GOGAT  | LAIAMNKLGG  | KSNTGEGGEL | PSRLVPLPDG  | SMNPKRSAIK  | QVASGRFGVT  | SYLITNADEL  | QIKMAQGA    | GEGGELPGHK | 111        |     |  |  |     |  |  |  |  |     |  |
| AINADH-GOGAT  | LAMAMNKLGG  | KSNTGEGGEL | PSRMEPLADG  | SRNPKRSSIK  | QIASGRFGVS  | SYLITNADEL  | QIKMAQGA    | GEGGELPGHK | 111        |     |  |  |     |  |  |  |  |     |  |
| NnNADH-GOGAT1 | LAIAMNKLGG  | KSNTGEGGEL | PSRMQPLPDG  | SMNPKRSAIK  | QVASGRFGVS  | SYLITNADEL  | QIKMAQGA    | GEGGELPGHK | 110        |     |  |  |     |  |  |  |  |     |  |
| NnNADH-GOGAT2 | LAIAMNKLGG  | KSNTGEGGEL | PSRMQPLPDG  | SRNPKRSAIK  | QVASGRFGVS  | SYLITNADEL  | QIKMAQGA    | GEGGELPGHK | 110        |     |  |  |     |  |  |  |  |     |  |
| OsNADH-GOGAT1 | LAMAMNKLGG  | KSNTGEGGEL | PSRMEPLADG  | SMNPKRSAIK  | QVASGRFGVS  | SYLITNADEL  | QIKMAQGA    | GEGGELPGHK | 109        |     |  |  |     |  |  |  |  |     |  |
| SbNADH-GOGAT1 | LAIAMNKLGG  | KSNTGEGGEL | PSRMEPLPDG  | SMNPKRSAIK  | QVASGRFGVS  | SYLITNADEL  | QIKMAQGA    | GEGGELPGHK | 108        |     |  |  |     |  |  |  |  |     |  |
| BdNADH-GOGAT1 | LAVAMNKLGG  | KSNTGEGGEL | PSRMEPLPDG  | SMNPKRSAIK  | QVASGRFGVS  | SYLITNADEL  | QIKMAQGA    | GEGGELPGHK | 108        |     |  |  |     |  |  |  |  |     |  |
| OsNADH-GOGAT2 | LAEAMNKLGG  | KSNTGEGGEL | PCRMVPLPDG  | SKNPRISAIK  | QVASGRFGVS  | IYYLTNAVEV  | QIKMAQGA    | GEGGELPGHK | 109        |     |  |  |     |  |  |  |  |     |  |
| SbNADH-GOGAT2 | MARAQNIKRA  | KSNTGEGGEL | PSRMEPLPDG  | SMNPLSSAIK  | QVASGRFGVS  | IYYLTNAIEL  | QIKMAQGA    | GEGGELPGHK | 110        |     |  |  |     |  |  |  |  |     |  |
| BdNADH-GOGAT2 | LAEAMNKLGG  | KSNTGEGGEL | PSRMELLADG  | SMNPRISAIK  | QVASGRFGVS  | IYYLTNAIEI  | QIKMAQGA    | GEGGELPGHK | 109        |     |  |  |     |  |  |  |  |     |  |
| Consensus     | LAIAMNKLGG  | KSNTGEGGEL | PSRMEPLPDG  | SMNPKRSAIK  | QVASGRFGVS  | SYLITNADEL  | QIKMAQGA    | GEGGELPGHK |            |     |  |  |     |  |  |  |  |     |  |



|               |             |            |             |            |             |             |             |             |       |  |
|---------------|-------------|------------|-------------|------------|-------------|-------------|-------------|-------------|-------|--|
|               |             |            | 1,140       |            | 1,160       |             | 1,180       |             | 1,200 |  |
| SpNADH-GOGAT  | VIGDIAVTRN  | STAGVGLISP | PPHHDYSISIE | DLAQLIHDLK | NSNPGARISV  | KLVSEAGVGV  | IASGVVKGHA  | DHVLISGHDG  | 1193  |  |
| AINADH-GOGAT  | VIGDIAITRN  | STAGVGLISP | PPHHDYSISIE | DLAQLIHDLK | NANPGARISV  | KLVSEAGVGV  | IASGVVKGHA  | DHVLISGHDG  | 1190  |  |
| NnNADH-GOGAT1 | VIGDIAVTRN  | STAGVGLISP | PPHHDYSISIE | DLAQLIHDLK | NANPGARISV  | KLVSVAGVGV  | IASGVVKGHA  | EHVLSGHDG   | 1185  |  |
| NnNADH-GOGAT2 | VIGDIAVTRN  | STAGVGLISP | PPHHDYSISIE | DLAQLIHDLK | NSNPGARISV  | KLVSEAGVGV  | IASGVVKGHA  | DHVLISGHDG  | 1185  |  |
| OsNADH-GOGAT1 | VIGDIAVTRH  | STAGVGLISP | PPHHDYSISIE | DLAQLIHDLK | NSNPRARISV  | KLVSEAGVGV  | VASGVVKGHA  | DHVLISGHDG  | 1171  |  |
| SbNADH-GOGAT1 | VIGDIAVTRH  | STAGVGLISP | PPHHDYSISIE | DLAQLIHDLK | NSNPGARISV  | KLVSEAGVGV  | VASGVVKGHA  | DHVLISGHDG  | 1167  |  |
| BdNADH-GOGAT1 | VIGDIAVTRH  | STAGVGLISP | PPHHDYSISIE | DLAQLIHDLK | NSNPGARISV  | KLVSEAGVGV  | VASGVVKGHA  | DHVLISGHDG  | 1167  |  |
| OsNADH-GOGAT2 | VIGDIAVTRH  | STAGVGLISP | PPHHDYSISIE | DLAQLIHDLK | NANPGARISV  | KLVSEAGVGV  | VASGVVKGHA  | DHVLISGHDG  | 1177  |  |
| SbNADH-GOGAT2 | VIGDIAVTRH  | STAGVGLISP | PPHHDYSISIE | DLAQLIYDLK | SNPGARISV   | KLVSEAGVGV  | VASGVVKGHA  | DHVLISGHDG  | 1187  |  |
| BdNADH-GOGAT2 | VIGDIAVTRH  | STAGVGLISP | PPHHDYSISIE | DLSQLIHDLK | NANPGARISV  | KLVSEAGVGV  | VASGVVKAHA  | DHVLISGHDG  | 1171  |  |
| Consensus     | VIGDIAVTRX  | STAGVGLISP | PPHHDYSISIE | DLAQLIHDLK | NSNPGARISV  | KLVSEAGVGV  | VASGVVKGHA  | DHVLISGHDG  |       |  |
|               |             | 1,220      |             | 1,240      |             | 1,260       |             | 1,280       |       |  |
| SpNADH-GOGAT  | GTGASRWTGI  | KNAGLPWELG | LAETHQTLVA  | NDLRGRTVLQ | TDGQLKTGKD  | VAAIALLGAE  | EFGFSTAPLI  | TLGCIIMMRKC | 1273  |  |
| AINADH-GOGAT  | GTGASRWTGI  | KNAGLPWELG | LAETHQTLVA  | NDLRGRTVLQ | TDGQLKTGRD  | VAAIALLGAE  | EFGFSTAPLI  | TLGCIIMMRKC | 1270  |  |
| NnNADH-GOGAT1 | GTGASRWTGI  | KNAGLPWELG | LAETHQTLVA  | NDLRGRITLQ | TDGQLKTGRD  | VVAIALLGAE  | EFGFSTAPLI  | TLGCIIMMRKC | 1265  |  |
| NnNADH-GOGAT2 | GTGASRWTGI  | KNAGLPWELG | LAETHQTLVA  | NDLRGRITLQ | TDGQLKTGRD  | VVAIALLGAE  | EFGFSTAPLI  | TMGCIIMMRKC | 1265  |  |
| OsNADH-GOGAT1 | GTGASRWTGI  | KNAGLPWELG | LAETHQTLVA  | NGLRGRAILQ | TDGQLKTGKD  | VAVACLLGAE  | EFGFSTAPLI  | TLGCIIMMRKC | 1251  |  |
| SbNADH-GOGAT1 | GTGASRWTGI  | KNAGLPWELG | LAETHQTLVA  | NGLRGRAVLQ | TDGQLKTGRD  | VAVACLLGAE  | EFGFSTAPLI  | TLGCIIMMRKC | 1247  |  |
| BdNADH-GOGAT1 | GTGASRWTGI  | KNAGLPWELG | LAETHQTLVA  | NGLRGRAVLQ | TDGQLKTGRD  | VAVACLLGAE  | EFGFSTAPLI  | TLGCIIMMRKC | 1247  |  |
| OsNADH-GOGAT2 | GTGASRWTGI  | KNAGLPWELG | LAETHQTLVA  | NGLRGRAVLQ | TDGQMKTGKD  | VAVACLLGAE  | EFGFSTAPLI  | TLGCIIMMRKC | 1257  |  |
| SbNADH-GOGAT2 | GTGASRWTGI  | KNAGLPWELG | LAETHQTLVA  | NGLRGRAVLQ | TDGQMKTGKD  | VVAIACLLGAE | EFGFSTAPLI  | ALGCIIMMRKC | 1267  |  |
| BdNADH-GOGAT2 | GTGASRWTGI  | KNAGLPWELG | LAETHQTLVA  | NGLRGRAVLQ | TDGQLKTGRD  | VVAIACLLGAE | EFGFSTAPLI  | TLGCIIMMRKC | 1251  |  |
| Consensus     | GTGASRWTGI  | KNAGLPWELG | LAETHQTLVA  | NGLRGRAVLQ | TDGQLKTGRD  | VAXACLLGAE  | EFGFSTAPLI  | TLGCIIMMRKC |       |  |
|               |             | 1,300      |             | 1,320      |             | 1,340       |             | 1,360       |       |  |
| SpNADH-GOGAT  | HKNTCPVGIA  | TQDPVLRKFF | AGEPEHVINF  | FFMLAEVRE  | IMAQLGFRTL  | LEMVGRSDML  | EIDQVNVNSN  | EKLENDLSL   | 1353  |  |
| AINADH-GOGAT  | HKNTCPVGIA  | TQDPVLRKFF | AGEPEHVINF  | FFMLAEVRE  | IMSGLGFRTV  | TEMIGRADML  | ELDRVVKNN   | EKLENDLSL   | 1350  |  |
| NnNADH-GOGAT1 | HKNTCPVGIA  | TQDPVLRKFF | AGEPEHVINF  | FFMLAEVRE  | IMSGLGFRTI  | NEMVGRSDML  | EVDKEVVNSN  | EKLENDLSL   | 1345  |  |
| NnNADH-GOGAT2 | HKNTCPVGIA  | TQDPVLRKFF | AGEPEHVINF  | FFMLAEVRE  | IMSGLGFRTI  | NEMVGRSDML  | EVDKEVKNK   | EKLENDLSL   | 1345  |  |
| OsNADH-GOGAT1 | HTNTCPVGIA  | TQDPVLRKFF | AGEPEHVINF  | FFMLAEELRE | IMSGLGFRTI  | TEMVGRSDML  | EVDPEVVKSN  | EKLENDLSL   | 1331  |  |
| SbNADH-GOGAT1 | HMNTCPVGIA  | TQDPVLRKFF | AGEPEHVINF  | FFMLAEELRE | IMANLGFRTI  | TEMVGRSDML  | EVDPEVVKSN  | EKLENDLSL   | 1327  |  |
| BdNADH-GOGAT1 | HTNTCPVGIA  | TQDPVLRKFF | AGEPEHVINF  | FFMLAEELRE | IMAQLGLRSI  | NEMVGRSDML  | EVDPEVVKSN  | EKLENDLSL   | 1327  |  |
| OsNADH-GOGAT2 | HTNTCPAGIA  | TQDPVLRKFF | AGKPEHVINY  | FFMLAEVRE  | IMAQLGFRTV  | NEMVGRSDML  | EIDPKVLEGN  | EKLENDLSR   | 1337  |  |
| SbNADH-GOGAT2 | HTNTCPVGIA  | TQDPVLRKFF | SGKPEHLINF  | FFMLAEVRE  | IMSGLGFRTI  | NEMVGRSDML  | EVDPEVLKGN  | EKLQNDLSL   | 1347  |  |
| BdNADH-GOGAT2 | HTNTCPVGIA  | TQDPVLRKFF | SGKPEHVINY  | FFMVAEVRE  | IMSRLGFRTV  | NEMVGRSDML  | EVDPEVLKGN  | EKLENDLSQ   | 1331  |  |
| Consensus     | HTNTCPVGIA  | TQDPVLRKFF | AGEPEHVINF  | FFMLAEVRE  | IMSGLGFRTI  | NEMVGRSDML  | EVDPEVVKSN  | EKLENDLSL   |       |  |
|               |             | 1,380      |             | 1,400      |             | 1,420       |             | 1,440       |       |  |
| SpNADH-GOGAT  | LLKPAAEIRP  | EAAQYCIQKQ | DHGLDMALDN  | KLIVLSKAAL | EKGLPVYIDL  | PVQNVNRAVG  | TMLSHEVTKR  | YRMDGLPSDC  | 1433  |  |
| AINADH-GOGAT  | LLRPAAEIRP  | EAAQYCVQKQ | DHGLDMALDQ  | ELIALSKAAL | EKSLPVYIET  | PICNVNRAVG  | TMLSHEVTKR  | YHGLTLPKDT  | 1430  |  |
| NnNADH-GOGAT1 | LLRPAADIRP  | EAAQYCIQKQ | DHGLDMALDN  | KLIALSTPAL | EKGLPVYIEV  | PIRNVNRAVG  | TMLSHEVTKR  | YHMAGLPADT  | 1425  |  |
| NnNADH-GOGAT2 | LLRPAADIRP  | EAAQYCIQKQ | DHGLDMALDQ  | KLIALSKAAL | EKALPVYIEL  | PIRNVNRAVG  | TMLSHEVTKR  | YHIALGLPADT | 1425  |  |
| OsNADH-GOGAT1 | LLKPAAEIRP  | EAAQYCVQKQ | DHGLDMALDN  | KLIALSKAAL | EKEVRFVLET  | PIQNTNRAVG  | TMLSHEVTKR  | YHMKGLPAGT  | 1411  |  |
| SbNADH-GOGAT1 | LLKPAASEIRP | GVAQYCVQKQ | DHGLDMALDN  | KLIDLSRTAI | EKQVRVFIET  | PIQNTNRAVG  | TMLSHEVTKR  | YHMSGLPAGT  | 1407  |  |
| BdNADH-GOGAT1 | LLKPAAEIRP  | GAAQYCVQKQ | DHGLDMALDN  | KLIALSKAAL | EKQVRVFIET  | PIKNTNRAVG  | TMLSHEVTKR  | YHMKGLDSDT  | 1407  |  |
| OsNADH-GOGAT2 | LLKPAAEISP  | GAVQYCVQKQ | DHGLDMALDN  | KLIASSTAAL | EKGVRVFIET  | PVRNINRAVG  | TMLSHEVTKR  | YHIGHLPSDT  | 1417  |  |
| SbNADH-GOGAT2 | LLKPAAEISP  | EAVQYCVQKQ | DHGLDKALDN  | KLIASSRAAL | EKRFRVFIET  | LKNTDRAVG   | TMLSHEVTKL  | FRMPGLPDDT  | 1427  |  |
| BdNADH-GOGAT2 | LLKPAASKISP | GAAQYCVQKQ | DHGLHRAALDN | KLIALSRVAL | EKGSRVFIET  | SVRNTNRTVG  | AMLSHEVTKR  | YHIGHLPSDT  | 1411  |  |
| Consensus     | XLKPAAEIRP  | GAAQYCVQKQ | DHGLDMALDN  | KLIALSKAAL | EKGXRVFIET  | PIRNTNRAVG  | TMLSHEVTKR  | YHMXGLPXD   |       |  |
|               |             | 1,460      |             | 1,480      |             | 1,500       |             | 1,520       |       |  |
| SpNADH-GOGAT  | IHIKLGSGSAG | QSLGAFLCPG | ITLELEGDSN  | DYVGKGLSGG | KVIVYPPRKS  | NFDPKENIVI  | GNVALYGATK  | GEAYFNGMAA  | 1513  |  |
| AINADH-GOGAT  | IHIKFTGSAG  | QSLGAFLCPG | IMLELEGDSN  | DYVGKGLSGG | KVVYPPKGS   | SFDPKENIVI  | GNVALYGATS  | GEAYFNGMAA  | 1510  |  |
| NnNADH-GOGAT1 | IHIKLGGSAG  | QSLGAFLCPG | ITLELEGDSN  | DYVGKGLSGG | KIVVYPPRES  | QFDPKENIVI  | GNVALYGATS  | GEAYFNGMAA  | 1505  |  |
| NnNADH-GOGAT2 | IHIKLTGSAG  | QSFGAFLCPG | IMLELEGDSN  | DYVGKGLSGG | KIVVYPPRKS  | QFDPKENIVI  | GNVALYGATS  | GEAYFNGMAA  | 1505  |  |
| OsNADH-GOGAT1 | IHVKL TGSAG | QSLGAFLCPG | ITLELEGDSN  | DYVGKGLSGG | KIVVYPPRDS  | TFIPEDNIVI  | GNVALYGATI  | GEAYFNGMAA  | 1491  |  |
| SbNADH-GOGAT1 | IHVYKFTGSAG | QSFGAFLCPG | ITLELEGDSN  | DYVGKGLSGG | KIVVYPPRNS  | SFVPEDNIVI  | GNVALYGATK  | GEAYFNGMAA  | 1487  |  |
| BdNADH-GOGAT1 | IHVKL TGSAG | QSFGAFICPG | ITLELEGDSN  | DYVGKGLSGG | KIVVYPPRNS  | TFIPEDNIVI  | GNVALYGATK  | GEAYFNGMAA  | 1487  |  |
| OsNADH-GOGAT2 | IHIKLGSGSAG | QSFGAFLCPG | ITLELEGDSN  | DYVGKGLSGG | KIVVYPPRNS  | RFNPDQDNIVI | GNVALYGATK  | GEAYFNGMAA  | 1497  |  |
| SbNADH-GOGAT2 | IHVKLNGSAG  | QSFGAFLCPG | ITLELEGDSN  | DYVGKGLSGG | KIVVYPPRNS  | RFIPQDNIVI  | GNVALYGSTK  | GEAYFNGMAA  | 1507  |  |
| BdNADH-GOGAT2 | IHVKLNGSAG  | QSFGAFLCPG | ITLKLEGDSN  | DYVGKGLSGG | KIVVYPPRNS  | RFNPDQDNIVI | GNVALYGSTK  | GEAYFNGMAA  | 1491  |  |
| Consensus     | IHXKLTGSAG  | QSFGAFLCPG | ITLELEGDSN  | DYVGKGLSGG | KIVVYPPRNS  | RFDPKDNIVI  | GNVALYGATK  | GEAYFNGMAA  |       |  |
|               |             | 1,540      |             | 1,560      |             | 1,580       |             | 1,600       |       |  |
| SpNADH-GOGAT  | ERFCVRNSGA  | KAVVEGVGDH | GCEYMTGGTV  | VVLGKTGRNF | AAGMSGGVIAY | VLDADSTFKT  | RCNLELVOLD  | KVEEEDDITT  | 1593  |  |
| AINADH-GOGAT  | ERFSVRNSGA  | KAVVEGLGDH | GCEYMTGGTV  | VVLGKTGRNF | AAGMSGGIAY  | VLDVDGKFNT  | RCNLELVOLD  | KVEEEDDKMT  | 1590  |  |
| NnNADH-GOGAT1 | ERFCVRNSGA  | KAVVEGVGDH | GCEYMTGGTV  | VVLGKTGRNF | AAGMSGGIAY  | VLDVDGKFQS  | RCNLELVOLD  | KVEEEDIMT   | 1585  |  |
| NnNADH-GOGAT2 | ERFCVRNSGA  | KAVVEGVGDH | GCEYMTGGTV  | VVLGKTGRNF | AAGMSGGIAY  | VLDVDEKFQS  | RCNLELVOLD  | KVEEEDIMT   | 1585  |  |
| OsNADH-GOGAT1 | ERFCVRNSGA  | QAVVEGIGDH | GCEYMTGGTV  | VILGKTGRNF | AAGMSGGIAY  | VYDIDGKFSV  | RCNHELVDLY  | HVEEEDDITT  | 1571  |  |
| SbNADH-GOGAT1 | ERFCVRNSGA  | QAVVEGIGDH | GCEYMTGGTV  | VILGKTGRNF | AAGMSGGIAY  | VYDVGKFSV   | RCNHELVDLY  | HVEEEDDITT  | 1567  |  |
| BdNADH-GOGAT1 | ERFCVRNSGA  | ITVVEGIGDH | GCEYMTGGTV  | VILGKTGRNF | AAGMSGGIAY  | VYDVGTFSA   | RCNHELVDLY  | HVEEEDDITT  | 1567  |  |
| OsNADH-GOGAT2 | ERFCVRNSGA  | QAVVEGIGDH | GCEYMTGGTV  | VILGKTGRNF | AAGMSGGIAY  | VYDVGKFSV   | RCNYELVDLY  | AVVEEDDITT  | 1577  |  |
| SbNADH-GOGAT2 | ERFCVRNSGA  | QAVVEGIGDH | GCEYMTGGTV  | VILGKTGRNF | AAGMSGGIAY  | VYDVGMFST   | RCNHELVDLY  | NVDEEDDITT  | 1587  |  |
| BdNADH-GOGAT2 | ERFCVRNSGA  | EAVVEGIGDH | GCEYMTGGTV  | VILGKTGRNF | AAGMSGGIAY  | VYDVGKFSV   | RCNHELVELY  | RVVEEDDIT   | 1571  |  |
| Consensus     | ERFCVRNSGA  | XAVVEGIGDH | GCEYMTGGTV  | VILGKTGRNF | AAGMSGGIAY  | VYDVGKFSV   | RCNXELVDLY  | KVEEEXDITT  |       |  |
|               |             | 1,620      |             | 1,640      |             | 1,660       |             | 1,680       |       |  |
| SpNADH-GOGAT  | LRVMIQQHQR  | HTNSELAKEV | LANFDELLPK  | FVKVFPDYK  | RVLQNMKAEE  | AAKEAQ----  | ---QREE-AE  | LMKKDAFQEL  | 1665  |  |
| AINADH-GOGAT  | LKMMIQQHQR  | HTNSQLAQEV | LADFENLLPK  | FIKVFPDYK  | RVLSAMKHEE  | VSKQATIRAS  | EEADETEEKE  | LEEKDAFAEL  | 1670  |  |
| NnNADH-GOGAT1 | LRMMIQQHQR  | HTNSELAREV | LANFENLLPK  | FIKVFPDYK  | RVLANLRAEQ  | AAKDAKERRA  | KEAEEQEEAE  | LMEKDAFEEL  | 1665  |  |
| NnNADH-GOGAT2 | LRMMIQQHQR  | HTNSELAREV | LADFENLLPK  | FIKVFPDYK  | RVLANMKAEQ  | AAK-----KVV | REAQEEQEEAE | LMKKDAFEEL  | 1661  |  |
| OsNADH-GOGAT1 | LKMMIEQHRL  | NTGSVARDI  | LSNFDNLLPK  | FVKVFPDYK  | RVLQNMKAEE  | AA-----A    | LKAKEP----  | -----       | 1630  |  |
| SbNADH-GOGAT1 | LKMMIEQHRL  | NTESVLARDI | LSDFDNLLPK  | FVKVFPDYK  | RVLQNMKAEE  | AV-----A    | KAKEP-----  | -----       | 1626  |  |
| BdNADH-GOGAT1 | LKMMIEQHRL  | HTGSVLAKDI | LKSFSSLLPK  | FVKVFPDYK  | RVLQNMKAEE  | AA-----A    | SHAKEP----  | -----       | 1626  |  |
| OsNADH-GOGAT2 | LRMMIQQHRL  | HTQSDLRDI  | LSNFDNLLPK  | FIKVFPDYK  | RVLQNMKAEE  | AA-----A    | KEAEQKAREV  | V-DKKPVEVI  | 1648  |  |
| SbNADH-GOGAT2 | LRVMIQQHRL  | NTESVLAKDI | LSNFDNLLPK  | FVKVFPDYK  | RVLQNMKAEE  | V-----A     | KEAEQKMRKK  | GWKKKAGEMI  | 1659  |  |
| BdNADH-GOGAT2 | LRMMIEQHRL  | NTESHLAKYI | LSSFEDQLPK  | FVKVFPDYK  | RVLQNMKAEE  | VAKA-----   | ---AEEKTRKM | LMDKKAGEET  | 1643  |  |
| Consensus     | LRMMIQQHRL  | HTXSVLARDI | LSNFDNLLPK  | FVKVFPDYK  | RVLQNMKAEE  | AAK-----A   | KEAEEEXE-XE | LMDKDAFEEL  |       |  |



|               |            |             |            |             |            |            |            |             |      |
|---------------|------------|-------------|------------|-------------|------------|------------|------------|-------------|------|
| SpNADH-GOGAT  | KKLASASINE | KAN-GRIEEP  | QPLKRPTRVA | NAVKHGRGFVN | YEREGVSYRD | PNARIQDWKE | -VSEESKPGP | LLKTQSARCM  | 1743 |
| AINADH-GOGAT  | KNMMAASSKE | EMSGNGVAAE  | A---RPSKVD | NAVKNGGFIA  | YEREGVKYRD | PNVRLNDWNE | -VMEESKPGP | LLTQSARCM   | 1746 |
| NnNADH-GOGAT1 | KKLAAASLND | KAS-QKVEKA  | VQLKRPTKVD | NAIKNGGFIA  | YERESISYRD | PSNRISDWKE | -VMEEPKPGP | LLNTQSARCM  | 1743 |
| NnNADH-GOGAT2 | KKLALASSND | RDKVNKEQV   | VASKRPTKVD | NAVKNGGFIA  | YERESISYRD | PTVRVNDWKE | -VMEESKLG  | LLKTQSARCM  | 1740 |
| OsNADH-GOGAT1 | KISNGVSVTT | K-----KVQPE | QSTNRPTRSV | NAKKYRGFIS  | YERESISYRD | PNERVKDWKE | -VAIESVPGP | LLNTQSARCM  | 1705 |
| SbNADH-GOGAT1 | KVANGISVTT | K-----KVQPD | QSASRPTRVA | NAKKYRGFIT  | YERESISYRD | PKERVKDWKE | -VAIESTPGP | LLNTQSARCM  | 1701 |
| BdNADH-GOGAT1 | KVPNGVSVTT | K-----KIQTE | QSTSRPTRVA | NAKKYRGFIS  | YEREGISYRD | PNERVKDWKE | -VAIESVPGP | LLNTQSARCM  | 1701 |
| OsNADH-GOGAT2 | QAPNGISVKT | E-----KVMNE | EPSSRPSRVS | NAVKYRGFIK  | YEREGTSYRD | PNERVKDWNE | -VAIELVPGP | LLKTQSARCM  | 1723 |
| SbNADH-GOGAT2 | KAPNGISVIT | K-----KVQNK | KSSSRPTQVF | NAERPRGFVE  | YEQQGISYRD | ENERVKDWGE | -VTNELVPGP | LLNTQSARCM  | 1734 |
| BdNADH-GOGAT2 | KASNGSSVVT | K-----QMNDR | KPSGQPTQVS | NAIKEQGFI   | FGREEVSCRD | PNERTKDWDE | LVKNELVPGP | LLRTQSARCM  | 1719 |
| Consensus     | KXXNGASVXT | K-----KVQXE | QSSSRPTRVX | NAVKYRGFIA  | YEREGISYRD | PNERVKDWKE | -VAXESVPGP | LLNTQSARCM  |      |
| SpNADH-GOGAT  | DCGTPFCHQD | NSG--CPLGN  | KIPEFNELVH | QERWREALDR  | LLETNNFPEF | TGRVCPAPCE | GSCVLGIIEN | PVSIKSIIECS | 1821 |
| AINADH-GOGAT  | DCGTPFCHQE | NSG--CPLGN  | KIPEFNELVY | QNRWQREALNR | LLETNNFPEF | TGRVCPAPCE | GSCVLGIIEN | PVSIKSIIECA | 1824 |
| NnNADH-GOGAT1 | DCGTPFCHQE | NSG--CPLGN  | KIPEFNELVY | QNRWREALDR  | LLETNNFPEF | TGRVCPAPCE | GSCVLGIIEN | PVSIKSIIECT | 1821 |
| NnNADH-GOGAT2 | DCGTPFCHQE | NSG--CPLGN  | KIPEFNELVY | QNRWREALDR  | LLETNNFPEF | TGRVCPAPCE | GSCVLGIIEN | PVSIKSIIECA | 1818 |
| OsNADH-GOGAT1 | DCGTPFCHQE | SSGAGCPLGN  | KIPEFNELVH | QNRWREALDR  | LLETNNFPEF | TGRVCPAPCE | GSCVLGIIEN | PVSIKSIIECA | 1785 |
| SbNADH-GOGAT1 | DCGTPFCHQE | SSGAGCPLGN  | KIPEFNELVH | QNRWREALDR  | LLETNNFPEF | TGRVCPAPCE | GSCVLGIIEN | PVSIKSIIECA | 1781 |
| BdNADH-GOGAT1 | DCGTPFCHQE | SSGAGCPLGN  | KIPEFNELVH | QNRWREALDR  | LLETNNFPEF | TGRVCPAPCE | GSCVLGIIEN | PVSIKSIIECS | 1781 |
| OsNADH-GOGAT2 | DCGTPFCHQE | SSGAGCPLGN  | KIPEFNELVH | QNRWREALDR  | LLETNNFPEF | TGRVCPAPCE | GSCVLGIIEN | PVSIKSIIECA | 1803 |
| SbNADH-GOGAT2 | DCGTPFCHQE | SSGAGCPLGN  | KIPEFNELVH | QNRWREALDR  | LLETNNFPEF | TGRVCPAPCE | GSCVLGIIEN | PVSIKSIIECA | 1814 |
| BdNADH-GOGAT2 | DCGTPFCHQE | SSGAGCPLGN  | KIPEFNELVH | QNRWREALDR  | LLETNNFPEF | TGRVCPAPCE | GSCVLGIIEN | PVSIKTIIECA | 1799 |
| Consensus     | DCGTPFCHQE | NSGAGCPLGN  | KIPEFNELVH | QNRWREALDR  | LLETNNFPEF | TGRVCPAPCE | GSCVLGIIEN | PVSIKSIIECA |      |
| SpNADH-GOGAT  | IIDKAFEEGW | MVPRPPLK--  | RTGKKIAIVG | SGPAGLAAAD  | QLNKMGHVT  | VFERADRIIG | LMMYGVPNMK | ADKVDIVQRR  | 1899 |
| AINADH-GOGAT  | IIDKAFEEGW | MVPRPPLK--  | RTGKKIAIVG | SGPAGLAAAD  | QLNKMGHVT  | VYERSDRIGG | LMMYGVPNMK | TDKIDVVQRR  | 1902 |
| NnNADH-GOGAT1 | IIDKAFKEGW | MVPRPPLR--  | RTGKRVAIVG | SGPAGLAAAD  | QLNKMGHVT  | VLERADRIIG | LMMYGVPNMK | ADKVDIVQRR  | 1899 |
| NnNADH-GOGAT2 | IIDKAFNEGW | MVPRPPPK--  | RTGKRVAIVG | SGPAGLAAAD  | QLNKMGHVT  | VFERADRIIG | LMMYGVPNMK | ADKVDIVQRR  | 1896 |
| OsNADH-GOGAT1 | IIDKGFEFGW | MVPRPPLQ--  | RTGKKIAIVG | SGPAGLAAAD  | QLNKMGHVT  | VFERADRIIG | LMMYGVPNMK | TDKIEIVQRR  | 1863 |
| SbNADH-GOGAT1 | IIDKGFEFGW | MVPRPPLQ--  | RTGKRVAIVG | SGPAGLAAAD  | QLNKMGHVT  | VFERADRIIG | LMMYGVPNMK | TDKIGIVQRR  | 1859 |
| BdNADH-GOGAT1 | IIDKGFEFGW | MVPRPPLQ--  | RTGKKIAIVG | SGPAGLAAAD  | QLNKMGHVT  | VYERSDRIGG | LMMYGVPNMK | TDKIGVVQRR  | 1859 |
| OsNADH-GOGAT2 | IIDKGFEFGW | MVPRPPLR--  | RTGKRVAIVG | SGPAGLAAAD  | QLNKMGHVT  | VFERADRIIG | LMMYGVPNMK | ADKEGIVQRR  | 1881 |
| SbNADH-GOGAT2 | IIDKGFEFGW | MVPRPPLQSQ  | RTGMTVAIVG | SGPAGLAAAD  | QLNKMGHVYV | VFERADRIIG | LMMYGVPNMK | ADKARIVKRR  | 1894 |
| BdNADH-GOGAT2 | IIDKGFEFGW | MVPRPPVH--  | RTGKEVAIVG | SGPAGMAAAD  | QLNKMGHVT  | VYERSDRIGG | LMMYGVPNMK | ADKTRIVQRR  | 1877 |
| Consensus     | IIDKGFEFGW | MVPRPPLQ--  | RTGKKVAIVG | SGPAGLAAAD  | QLNKMGHVT  | VFERADRIIG | LMMYGVPNMK | ADKIDIVQRR  |      |
| SpNADH-GOGAT  | VNLMAEEGVN | FVVNAHIGVD  | PSYSLDILRS | ENDAILLACG  | ATKPRDLPVP | GREFSGVHFA | MEFLHANTKS | LLDSNLDGDK  | 1979 |
| AINADH-GOGAT  | VDLMTKEGIN | FVVNANIGKD  | PSYSLDGLKE | ENDAIVLAVG  | STKPRDLPVP | GRDLSGVHFA | MEFLHANTKS | LLDSNHEDGN  | 1982 |
| NnNADH-GOGAT1 | VNLMAEEGVN | FVVNANVGTD  | PLYSIDLRLA | ENDAIVLALG  | ATKPRDLPVP | GRELKGVHFA | MEFLHANTKS | LLDSNLQDGN  | 1979 |
| NnNADH-GOGAT2 | VNLMAEEGVN | FVVNANVGTD  | PLYSIDLRLA | ENDAIVLALG  | ATKPRDLPVP | GRELKGVHFA | MEFLHANTKS | LLDSNLQDGN  | 1976 |
| OsNADH-GOGAT1 | VNLMAEEGIV | FVVNANVGSD  | PLYSIERLRS | ENDAVILACG  | ATKPRDLGIP | GRELSGVHFA | MEFLHANTKS | LLDSNLEDGR  | 1943 |
| SbNADH-GOGAT1 | VNLMAEEGIV | FVVNASVGS   | PLYSIERLRS | ENDAVILACG  | ATKPRDLTIP | GRELSGVHFA | MEFLHANTKS | LLDSNLEDGK  | 1939 |
| BdNADH-GOGAT1 | VNLMAEEGIV | FVVNAHVGS   | PLYSIERLRS | ENNAVILACG  | ATKPRDLSIP | GRELSGVHFA | MEFLHANTKS | LLDSNLEDGR  | 1939 |
| OsNADH-GOGAT2 | VELMAKEGVQ | FIVNAHVGS   | PLYSVEKLRS | ENDAILLACG  | ATKPKDLPVP | GRELAGIHFA | MEFLHANTKS | LLDSNLEDGN  | 1961 |
| SbNADH-GOGAT2 | VDLMDKEGVK | FIVNAHVGS   | PRYSIERLRS | ENDAVILACG  | ATPRDLPIP  | GRELSDIHFA | MDFLHSNTKS | LLDTNLEDGN  | 1974 |
| BdNADH-GOGAT2 | VDLMTKEGIV | FVVNAHVGRD  | PSYSIDLRLS | KNNAVILACG  | ATKPRDLPIP | GRQLSGIHFA | MEFLHANTKS | LLDSKLEDGN  | 1957 |
| Consensus     | VNLMAEEGVX | FVVNAHVGS   | PLYSIXRLRS | ENDAXILACG  | ATKPRDLPIP | GRELSGVHFA | MEFLHANTKS | LLDSNLEDGN  |      |
| SpNADH-GOGAT  | YISAKGKKVV | VIGGGDTGTD  | CIGTSIRHGC | TSVNVLELLP  | EPPAKRAPGN | PWPQWPRIFR | VDYGHQEAAT | KFGKDPRSIE  | 2059 |
| AINADH-GOGAT  | YISAKGKKVV | VIGGGDTGTD  | CIGTSIRHGC | TNIVNLELLP  | QPPSTRAPGN | PWPQWPRVFR | IDYGHQEAAT | KFGKDPRTYE  | 2062 |
| NnNADH-GOGAT1 | YISAKGKKVV | VIGGGDTGTD  | CIGTSIRHGC | TNIVNLELLP  | QPPQTRAPGN | PWPQWPRIFR | VDYGHQEAAT | KFGKDPRSIE  | 2059 |
| NnNADH-GOGAT2 | YISAKGKKVV | VIGGGDTGTD  | CIGTSIRHGC | TNIVNLELLP  | QPPKTRAPGN | PWPQWPRIFR | VDYGHQEAAT | KFGKDPRSIE  | 2056 |
| OsNADH-GOGAT1 | YISAKGKKVV | VIGGGDTGTD  | CIGTSIRHGC | TSVNVLELLT  | KPPSKRAADN | PWPQWPRIFR | VDYGHQEAAS | KFGNDPRTYE  | 2023 |
| SbNADH-GOGAT1 | YISARGKKVV | VIGGGDTGTD  | CIGTSIRHGC | TNLVNLELLS  | KPPSNRAADN | PWPQWPRIFR | VDYGHQEAAT | KFGKDPRTYE  | 2019 |
| BdNADH-GOGAT1 | YISAGKKVV  | VIGGGDTGTD  | CIGTSIRHGC | SSVNVLELLT  | KPPSKRAADN | PWPQWPRVFR | VDYGHQEAAS | KFGKDPRTYE  | 2019 |
| OsNADH-GOGAT2 | YISAQGRKVV | VIGGGDTGTD  | CIGTSIRHGC | TNLVNLELLP  | EPPRKRAPDN | PWPQWPRIFR | VDYGHQEATS | KFGKDPRSIE  | 2041 |
| SbNADH-GOGAT2 | YISARGKKVV | VIGGGDTGTD  | CIGTAIRHGC | SNLVNLELLP  | EPPRERAPDN | PWPQWPRIFR | RDYGHQEAAS | KFGKDPRTYQ  | 2054 |
| BdNADH-GOGAT2 | YISAGKKVV  | VIGGGDTGTD  | CIGTSIRHGC | SNLVNLELLP  | EPPTRAPDN  | NWPKFPRIFR | LDYGHQEAAS | KFGKDPRTYQ  | 2037 |
| Consensus     | YISAKGKKVV | VIGGGDTGTD  | CIGTSIRHGC | TNIVNLELLP  | EPPSKRAPDN | PWPQWPRIFR | VDYGHQEAAT | KFGKDPRTYE  |      |
| SpNADH-GOGAT  | VLTKRFIGDD | NGVVKGLEVV  | RVRWAKDASG | RFQFKEIAGS  | EEIEADLV   | LAMGFLGPEQ | KIAEELGVER | DNRSNFKADF  | 2139 |
| AINADH-GOGAT  | VLTKRFIGDD | NGVVKGLEVV  | RVSWEKDETS | RFQFKEIAGS  | EEIEADLV   | LAMGFLGPEP | TLAEKLGLEK | DNRSNFKAEY  | 2142 |
| NnNADH-GOGAT1 | VLTKRFLGDE | NGAVKGLEVV  | RVRWEKDESG | RFQFKEIAGS  | EEIEADLV   | LAMGFLGPES | TIAEKLGLEK | DNRSNFKADY  | 2139 |
| NnNADH-GOGAT2 | VLTKRFLGDE | NGTVKGLEVV  | RVQWEKDGAN | KFQFKEIAGS  | EEMIEADLV  | LAMGFLGPES | TIAEKLGLEK | DNRSNFKAEY  | 2136 |
| OsNADH-GOGAT1 | VLTKRFIGDE | NGNVKALEVV  | RVKWEK-VDG | RFQFKEIAGS  | NETIEADLV  | LAMGFLGPEA | TIAEKLGLEK | DNRSNFKAEY  | 2102 |
| SbNADH-GOGAT1 | VLTKRFIGDE | NGVKVKALEVV | RVKWEK-VDG | RFQFKEIAGS  | EEIEADLV   | LAMGFLGPEA | TIAEKLGLEK | DNRSNFKAEY  | 2098 |
| BdNADH-GOGAT1 | VLTKRFIGDE | NGKVKALEVV  | RVKWEK-VDG | RFQFKEIAGS  | QEIEADLV   | LAMGFLGPEA | TIAEKLGLEK | DNRSNFKAEY  | 2098 |
| OsNADH-GOGAT2 | VLTKRFIGDE | NGNVKALEVI  | RVEWKG-VDG | RFQFKEIAGS  | EEIEADLV   | LAMGFLGPEA | TVANKLGLEQ | DNRSNFKAEY  | 2120 |
| SbNADH-GOGAT2 | VLTKRFIGDE | NGKVKALEVV  | RVEWSK-VDG | RFQFKEIAGS  | QEIEADLV   | LAMGFLGPEA | AIKKLGLEQ  | DNRSNFKAEY  | 2133 |
| BdNADH-GOGAT2 | YMAKRFIGDE | DGKVKALEVV  | HVEWEK-VDG | RLQFKEVEGS  | EETIEADLV  | LAMGFLGPEV | TLADKLGLEQ | DNRSNFKAEY  | 2116 |
| Consensus     | VLTKRFIGDE | NGKVKALEVV  | RXWWEK-VDG | RFQFKEIAGS  | EEIEADLV   | LAMGFLGPEA | TIAEKLGLEK | DNRSNFKAEY  |      |
| SpNADH-GOGAT  | GRFSTNVEGI | FAAGDCRRGQ  | SLVWVAIAEG | RQAAQVDRY   | LKDDGSFGGD | DMASKISCHG | DLEDLVKNPG | SKRRVAA-    | 2216 |
| AINADH-GOGAT  | GRFSTTVEGV | FAAGDCRRGQ  | SLVWVAISEG | RQAAQVDRY   | LTKTDD---  | ---EDAKLQ  | DLNQMKHNTI | TN-----     | 2208 |
| NnNADH-GOGAT1 | GKFSTNVEGV | FAAGDCRRGQ  | SLVWVAISEG | RQAAQVDRY   | LMR-DSDPGT | -SDSQ----- | ---DVQKQD  | SSRLTLMT    | 2207 |
| NnNADH-GOGAT2 | GKFSTNMEGV | FATGDCRRGQ  | SLVWVAISEG | RQAAQVDRY   | LTR-EGKHS  | TSQSQC---- | ---DSAKQD  | KNQFTART    | 2207 |
| OsNADH-GOGAT1 | GNFATSVGDI | FAAGDCRRGQ  | SLVWVAITEG | RQAAAADVY   | LSR-NEQ--- | DAEDITPSG  | ---AGFVQVA | A-----      | 2167 |
| SbNADH-GOGAT1 | GDFATSVGDI | FAAGDCRRGQ  | SLVWVAITEG | RQAAAADVY   | LSR-YDQ--- | NAAGDITPSG | ---AGLVQVA | A-----      | 2163 |
| BdNADH-GOGAT1 | GDFATSVGDI | FAAGDCRRGQ  | SLVWVAITEG | REAAAADVY   | LSRDEQ---  | NSTQGITPSG | ---AGLVQIT | A-----      | 2163 |
| OsNADH-GOGAT2 | GNFATNVEGV | FAAGDCRRGQ  | SLVWVAITEG | RQAAAADVY   | LSK-DDEGET | NGTEDIAVSS | ---EGLVQPV | A-----      | 2188 |
| SbNADH-GOGAT2 | ENFATNVEGV | FAAGDCRRGQ  | SLVWVAIAEG | REAAAADVY   | LSR-E---KT | NVDENVVAPG | PCECLVQVA  | A-----      | 2200 |
| BdNADH-GOGAT2 | GNFATNVEGV | FAAGDCRRGQ  | SLVWVAITEG | REAAAADVY   | LS---DETCT | NDADDAIASS | ---IGLLQVA | AWRHQON-    | 2188 |
| Consensus     | GNFATNVEGV | FAAGDCRRGQ  | SLVWVAITEG | RQAAAADVY   | LSR-XDX--T | NSAEDITPSG | ---XGLVQVA | A-----      |      |



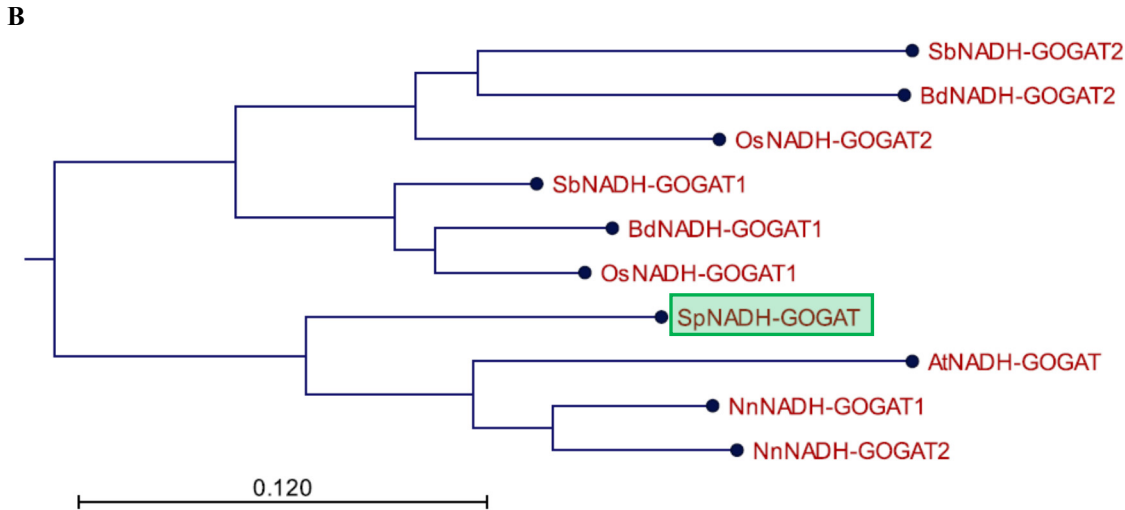

**Figure S13.** Sequence alignment NADH-GOGAT protein from *S.polyrhiza* with other representative species **(A)** and the resulted phylogenetic tree **(B)**. AtNADH-GOGAT - *A. thaliana*, NP\_200158.2, BdNADH-GOGAT1 - *B. distachyon*, XP\_003566997.1, BdNADH-GOGAT2 - *B. distachyon*, XP\_024315185.1, NnNADH-GOGAT1 - *N. nucifera*, XP\_010261570.1, NnNADH-GOGAT - *N. nucifera*, XP\_010266511.1, OsNADH-GOGAT1 - *O. sativa*, XP\_015649242.1, OsNADH-GOGAT2 - *O. sativa*, XP\_015640407.1, SbNADH-GOGAT1 - *S. bicolor*, XP\_002458326.1, SbNADH-GOGAT2 - *S. bicolor*, XP\_021302649.1, SpNADH-GOGAT - *S. polyrhiza* (sequence translated from. Acc. OL421563)

***SpNR***

[illegible]

***SpNiR***

CAGTTTAAAGCTCTATTATGTTCAAGCCCTATGAACCCTAGAATTAATGATCAGCCCTTGCCTTTTCACTTTTTTAGATAGGC  
ATCATAACCATGACTTCATTCCCTCATTGCAATTGACAAGAATATTATTTTTTAACATTATATTTACTTTTGGATAGTGGTGCTGAT  
TTCCCTTGAGAAACAATACCATAGATAGAGAGAGACACAAAAATCTTGATTTAGCCATGATTAAAAAATTTTATTGTTCAAGGGAG  
AGTAATGGAGGAAAACAGACAGACAAATTCCAAATTTGGCATGTTTTGCAAGGACTTCCAGCAACAGGTGAAAAGGTGAGGGACT  
CTTCTCTAAATCTAGTAGTTTACGAGTACCCCGATTTCTTTTTATAGTATAATAATACGATCTCCTTGAAAATAGAACCCCTTTG  
ACTGGTCGTCCACGTGACGAGCTCTTGAGCTGCCGTGGAGCCAGCGGAGCGTTGACCAGCAAGAAGAATGTTGCGACAGGAAACA  
TTTCGACGTGCAGCTGAAACTAATGGCGAGGATTTTTCTAACATTGTATTGCGACACAGTTTTTCTGTGGCGCCGATCGTCTTAT  
CAAGAAACGAAAGCGGTGCCCGGGAGGCCTCGGTCCGACGGGCTGGCCCTGCTGTGCGGCTCACC GCCTGCGGTACGCGCCCCC  
CTCACGGCCGAGGGAGCCGCTGACCTGTGGCCCCACCCACCATCCCCCCCCCTCGCTGCCGCCGTCTTCTTCCGTCCCTAAGACC  
CTTCTCTCGTCCGTGAGTCCCGCGTCGTCTTTAGAGAGAGCGAAGAGCCC AAGGCCAGATGCCCTCTCGTGCGACCGACTCTC  
CGCCGCCGCTCGCTTGGGGGGGCAACTCCGTCTCCCTCGTCGTCTACCTCTCGAGGTGTTAAGAACCCTGCGGCCCTTCCCACTGCC  
CCGATGGAGTCGCCACCGCCGCAGAGCAGCCCGCTGCCACCATCACC CGCGACCTCGTACCGCCatg

***SpGS1;1***

ATTTAAATTATTTTATAATGTATACATTATTTATGGGCTGAAAAATATAGAGTTATTGCAGAAATTCAGACCCT  
GAAATTTCTCTAAATTAAGTAAATATAGGAAAAATGTCAATAATTCTTGCCAGATAGATCTCCGGCCGCAA  
GTATTATTGCCAACTTTTTTTCACATCAGTCCCTCCAGGAATTCCATCCAGGCGGAAATTTCCCGAAATTATTTA  
TTTCAATAGGCGGCGAAGAGAATAAGGGATATATTTTTTATATCCTGTACTTTTAAAGTTTTTTAGTCCAAAGAA  
AGCATTCTGGGGGGGCATATTACAATAATGTGGACGAATGACAGCTCTC**GATTC**GTCTGATCAGATCGCATCCGAT  
GACGACGTTTGTTCCTCAATCGGAATATG**C**CACGTCATCAAGCGCGCTCTAGATACCGCCGG**GAATC**TGTTCCC  
ACTGGCAGAGTATCGTGAGATGGCCTAACTAAGTGGGGCCACATGCAACACCAAATTACCTTAAAGCCCTCAC  
CGGCAAGTCTAATCGCAGTCGACCCCGTTGACCGGGCCCCACCCGAAAACCTTTTTCCCTTTCATTAATACATC  
TAATACTAAGTTAATTAATTGAAACATAGTACTAACGTATTTCGTATTTTAC**ATATATTTAA**AATTAATTAAAT  
TTAAAAGTCAGCAGACTTGGAAGTCAAGCGTCTATAAGGGC**AATATA**GGCATTTCACCATAACCACAACCTCCTC  
CGAAAGGGACGC**GAATC**ACCGTAACAAATCGGTGACGTTACCGGCCATCCCGGAGTTCCGCGCTCCGCTAATAG  
AAATTAATTTATTAAACTCTCTCCGTG**ACGGCTAT**TAAAGATAGCA**GCGAGCCG**CTCCCCCTGCGCCCAATCGCGT  
CATCGCCTGGTGCATCTCCCCTGCTCTCGGATCTCGCCTCCTCTCTCCCCCTCCCCCTCCCTGGGGTTCTTCCC  
GCT**GAATC**TTCCCTTCCCCTCTCTCCCGTCTCTTCCGCC**atg**

**SpGS1;2**

CATCATATCGCCATAATTTTCCTTATAATAATCCCGCATTATTGTTTTTTAATGAGGGCCGTCGATGTGCCACG  
CCAGGCCAAGTGGGCTAACAAAATAAGCCCGCGAAATTATAACAGCGAGATTCTTTTCCGCGGTTCCGATTCGA  
TCAGGCGCGGAGGAAAGTAGCGGCCATTTATTGGCGACTGGGGGCTTCGAAATCTGAAGATTCCGGGTGGCGT  
TGACCAGCATGCTCTTGTAATAGCGCTTATCCATTAATGGGAAATAAATTATCCGACCGCCGGGATATTTTCGG  
CCCAGGTGGCGGGCTTCGGTTATTACGACCCCTCCCCAGGTGAGTTACTCAGTGTGGTTGAATCTAGACACAGA  
AAATCTAGATACGGGGGTGGGGCCCCGAGGCCACGTGGGGGCAGCTGGGTGGCGGGGAAAGAGTGGACTCTCGGC

GGAGCTCGAACTTGATTATTCTGATTAAATGAGCGGATCTAGACCCGCAACCCTCTGCCAGTACGCAGCGG**AAG**  
**AGCCC**GCCACATGCACTCGTGAGAGGAGAGGAATTTTGACCGGCATTGATGCATGCGTCACTTGTCACTGAC  
 CCTCGAATGTAGTAAAGTTTTTGATCCGCGAGGGCAGTAGCGCCATTTAAGA**GAATC**GTCTCTCTCTCTAGTTG  
 CGGGAAAATCGGTCAGCGGGGGAGCAAGTGGGGCCTACAGCTCCTCCGTGGCGGCGCAAAGTTACCGTACCAAC  
 CAGTTTTTCGGCGCCGATGTCAGGCTTCTGACTTTTGGGTGCCTC**CTCCCTCTT**CCTGTCGCAGC**AGGAGGAA**GG  
 GAGGGGAGGGTGGGGGCGGGCCACTGGAGATTTCTTCCTTGTTTTTTAAGGCTT**GAATC**CGCT**TATATAAA**GCG  
 CCCCCGCCGCTTCCCCACCAATCCATTACCGCAGCGCTCTCCCTGCCCGGCGGATTGATCGCAGTTCCCTCTC  
 CCGCCCCGCCTCCTGCGTCTCCAGCTTCG**G**CCGCTGCC**atg**

***SpGS1;3***

CCAACCTGGGTTGACCAGCGCTTTCTAATGAGATCCTCCATTTTAGTAAGGCGTAAACTTGCATTATTTCAAACAAAGAGGGGCTCAGTACATCCACGGTCGAGAACAGGGCAGTGGGCGGCGGCGGAGCGTTGGTAGATTTCTTCACTGTGCGGCGGCGGCGGTGGCGTCGGCGACCTACGAGGGCGGAGATGGGAATGGCTCAAACAGCGGCGGCGAGCAGTTCCAGAGGCCGCAGCAGCTGAAGAACCA CAGGCTGCAGAGAATTGAGGTCGAGGAGATGAGGGCAAAGAGAGAATTGACACTTGGAGGGAGGGGGAGTGAGAGACGAAGGGG **GATGCTTACC**ATGAAGCT**AAGAGCCC**GTCGGCTCCCGTGGCCTCTCAGCAGCGGCGGCGGCGGCAACGATGGCGGCGGCGGCAGGGCAGTGGGGGGGCAGCAGCAGGGGCGGCCTCTTGTGGCATGGGGGGGTCCATCGTTTCAGAGGAAGGAACAAGGGGGATGAAGGAGAGATCTGTTCTTCTTCTAGGGTGGACTCTTCTCCAGGGAGATCACCATCTGCCCTTCCAGCGCCGCCACCCAGCGGTCAGAGTCTAGAGAGCAGAGACGGAGAGAGAGAGAGAGAGTGGACTATTGGACCGAGCTGATGGGTGGAGTCTACTTTGGTGTTCAAGGCCAAATCCATATAACAGATGGGCGCTCTCCAGTGGGTTTGGGCTATCCCCCCCCCATTTGGGCCATTAGGCC**AA****TAAATATATAT**GCATGGAAGAGGCCCATCTCTGTGATCATCATCAGTGAGGGCGTCGGCCCTCGAATGCCACCTATTTTCGGCTGCCACCTCCCACCCGCCAAGAGCGCGGTGTTAGGCCGCCACGTAGGAACCTCCGAGCTCTTTTTCCGATGCTGATTTTGTGCTTCTGGTTGGTTACAGTCTCTCTCTCCCCAGGGGAGTAGCGCCTGCGTGCGAGTTCCCCAGTCGGCC**atg**

**SpGS2**

AGATGAATAAAAAATACCCCTTTTTGTGCAGAGCGGCAGCAGACGGATGTGTGTATGAGAGAGAGATGGCGCCCTTATCT**GAATC**CCCT  
TGGTCTTTGAGGGCTCCCAAGGGACCCGT**TTTCCTCC**ACTCAAAGCG**AAGAACC**TATCTGCTGGCGAAGAGCCGCCGAGGCCGA  
AGCTCGCCTCTCCCTCACACAGCTTAATCCGCCGTGTCCTGGGCACGTGGACCATAAACAGCTGAGAACCTCTCTTTTCTAGAG  
TATAAACGGTCCACCCG**CTCTCTCTCCCTCTCTCTCTCTCTCTCTCT**CGCTGTGTTTGAAATCTTCTCTCCTCCTCCCAACGACG  
CCGCCGCCGCCGGAGGAGCTGGTGGGCGCCCGCATTACCTCCCTGCCTCGCCGTCGCCCGGCGTCTCTCGGTTAG**CTCTCCCTCC**  
**CTCCCTCCCTCTCTCTCTCTCTCCCTATCTCTCT**ATCTCCTTCCCATGGGCTGCCCGAGGACTGTGGAATGACGACCTCATTTGGG  
GAGCAAGGCCGGCGTTGACCTTCGCCGCTTCGAAGGGTTCCTGTGCATTTCTCGTCATTTCGATGTTTACATGTAG**GATT**CACGGGT  
TTCGGTGGGGTGGGTCCCTCCGAAATCTGCATCAGACCGGCGCCTCATCGTTTCGGTTGGCTCGGGTTT**TTTATT**TACTCCGGGT  
TGA**CC**CTGCAAGATGCGGTTCTCGCCCTCGCTACGTGGCGTG**GATT**CATTCTGCCCCCGGAGCGTTTCATTCTTCAGAGGGGG  
ATCCCCTCCATTTTTGTCTGTCGGATCCTCTGTGTTCCCTTTTCGAGTATCTCCCATGTCTGATCCGAATGTCTCCGTTTCGCCTTGC  
CG**GATTGCGGTTGATTCTCCGAGAGATT**GTTGC**TGCCTTTT**GTTTTTATGATCC**ACGAGGCG**AATTGCGAATTCTGTTTCCATCT  
TCGGATCTTGATCAAAC**TA**GTTCAGAGCGGAGGAGAAGAGAGGGGACAGAAGGCGGAAGGAAAG**atg**

***SpFd-GOGAT***

GTCTCTTTTCCGAGGTAAGTCCAGTTATTTCAAATATTTTATTTTATCTTTCATATTCTCCAATGGGGGAGTACATCTAGGA  
TCATTTTCGAAGAGAGAGAGAGCGCCGAAAAAGCCAAGAAGCGAGAGGCAGGGAGAGGAGAGAGCGGAGAGGGACAGAGAGACAGA  
GAGGGAGGGGAGAGAAGAGAGAGAAAAGGTGAGTGAGAGGAGGAGAGAGAGAGGGGGGGATAGAGAAAGAATGAGAGGAGAGAGAA  
GAGAGAGAGAGGGTGGGATAGAGAAAAGAGAGACTGAGAGGAGCGAGAAGAGAGAGAGAGGGTGGGATAGAGAAAAGAGAGACTGAG  
AGGAGCGAGAAGAGAGAGAGAGAGAGAGAGAGAGAGTGAGAGGAGAGAGAAGAGAGATGAAGAGAGGGGGGAGAGAGAGAGAGAGA  
GAGAGAGAGAGAGAGAGGGTCCGAGGATAGTGGTTGGCAGGGTGCGGTAGAGGACAAGGCAGCGGCTCCCACCAGTGCCTGTGTC  
CTCCTCCCGGAGCTCTACTCCATTCCCTCTCCGCACGACGACGACGACTACGAGCGCTGGAGGCGAGTGGCTCACATCTCTCCC  
CTCCCCGCTCTCTCATTCTCGCTCTAACC**TCTCTCTATC**CTCTCTCTC**TGCAGCCT**CTCTCTCTCTCTCTCTCTATCTGTTGG  
CCAATCCTCCCGGCTTGGCAGCGCGGGCGCATCAGGATTATCCTGCTCTT**TGGCGTTT**CCTCTCCAC**GCGAGCCT**CTCCATTTTCG  
GATTTATATATTTGCGCATCTTCAAACCTTCCTGC**ATATTTTATT**GGCGTCGCG**TATAAATTTT**CGCTTCCCTGGTTTTGTTTTCC  
TGCTCTGCCGACCAGAAAAAGTCTCCTCCTCTCCACCTCGTCTCCTCCTCCTCCTTCCACTTCGGTTCCCTGGGGGATCCTG  
CTCTGCCGAGCGGTGGT**GAATCA**AGCGCGGCAGAGAGGAACGGGAGGGAGGGGAGGAAGGTGGG**atg**

## SpNADF-GOGAT

[illegible]



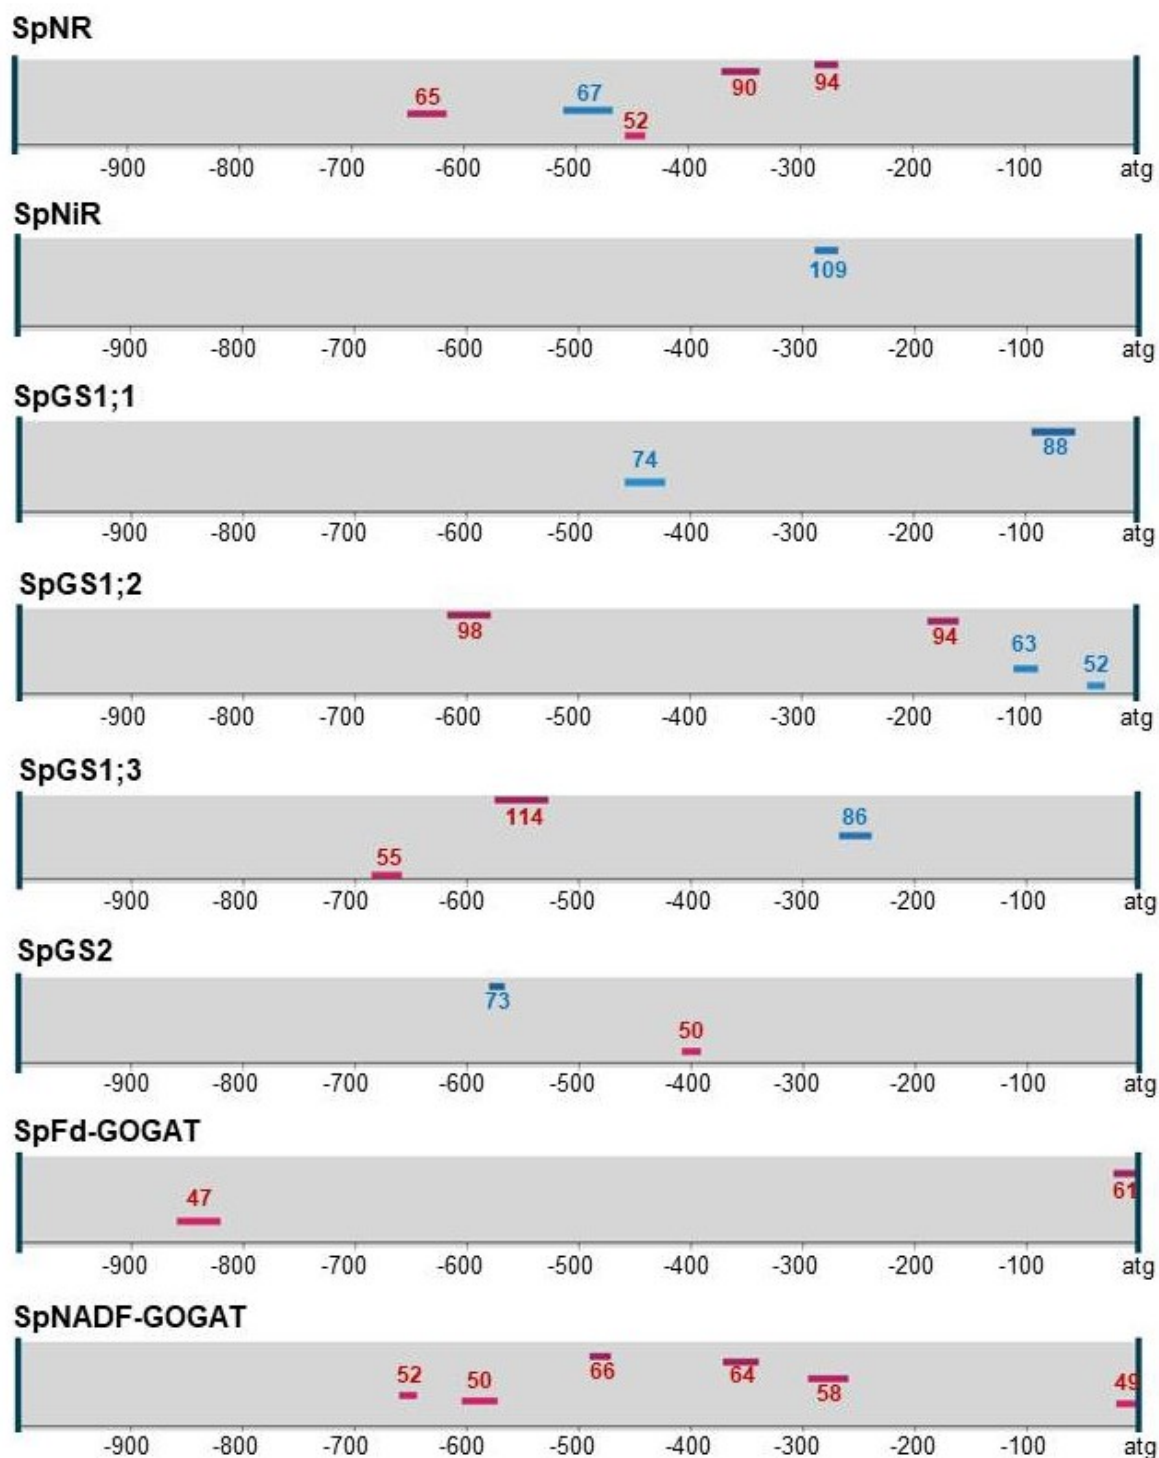

**Figure S15.** Patterns of G-quadruplex structures predicted for promoters of key *S. polyrhiza* genes involved in nitrogen assimilation, using the *pqsfinder* tool (<https://pqsfinder.fi.muni.cz>). Positions of G-quadruplex structures are indicated by horizontal lines (**red** for forward DNA strand, **blue** for reverse strand); Numbers next to bars indicate the relative strength of each G-quadruplex structure, and the negative (–) numbers indicate positions relative to the genes' translation start.
